# Supplementary material for: Genome-Wide Identification and Characterization of the Brassinazole-resistant (BZR) Gene Family and Its Expression in the Various Developmental Stage and Stress Conditions in Wheat (Triticum aestivum L.)
Source: MDPI journal article supplement (doi:10.3390/ijms22168743), 2021-08-14
Supplement: s1 [file s1]

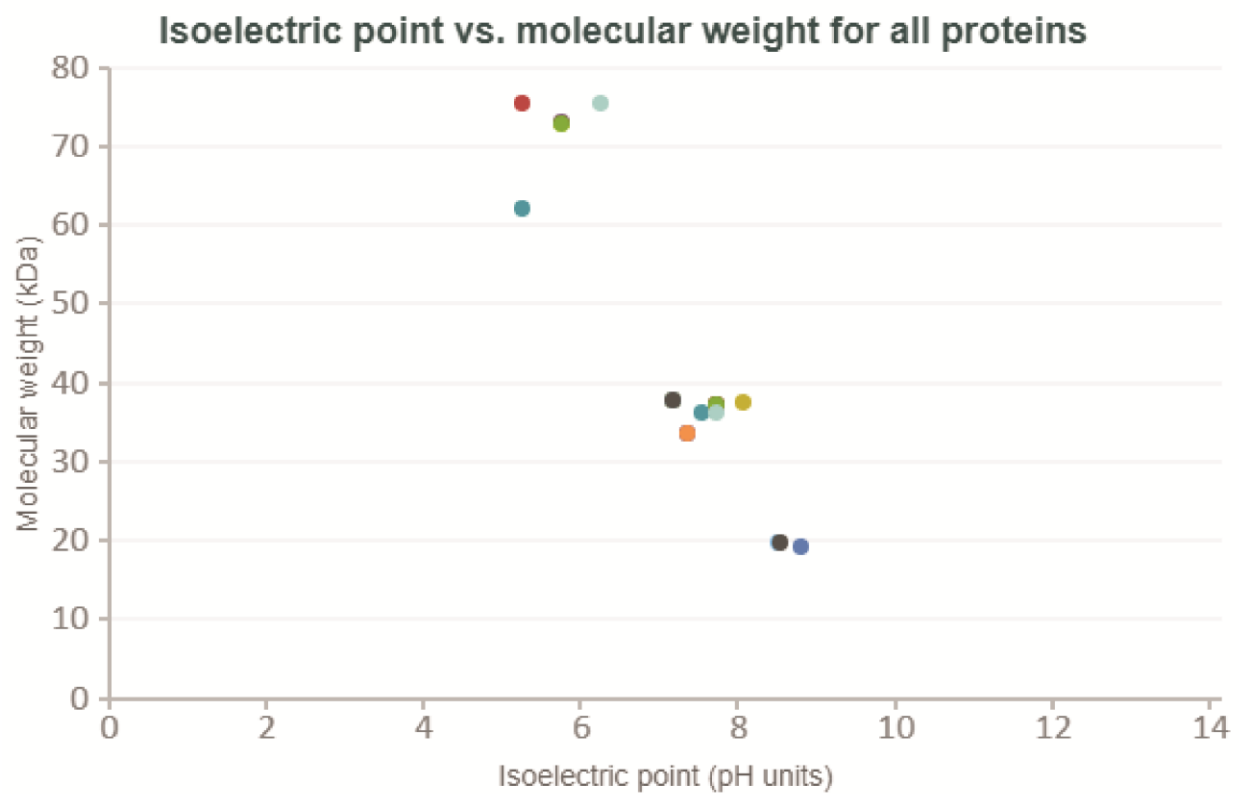

**Figure S1. Molecular weight (kDa) vs. isoelectric point plots of TaBZR genes.** The distinct round shape colors represent the *TaBZR* gene family members.

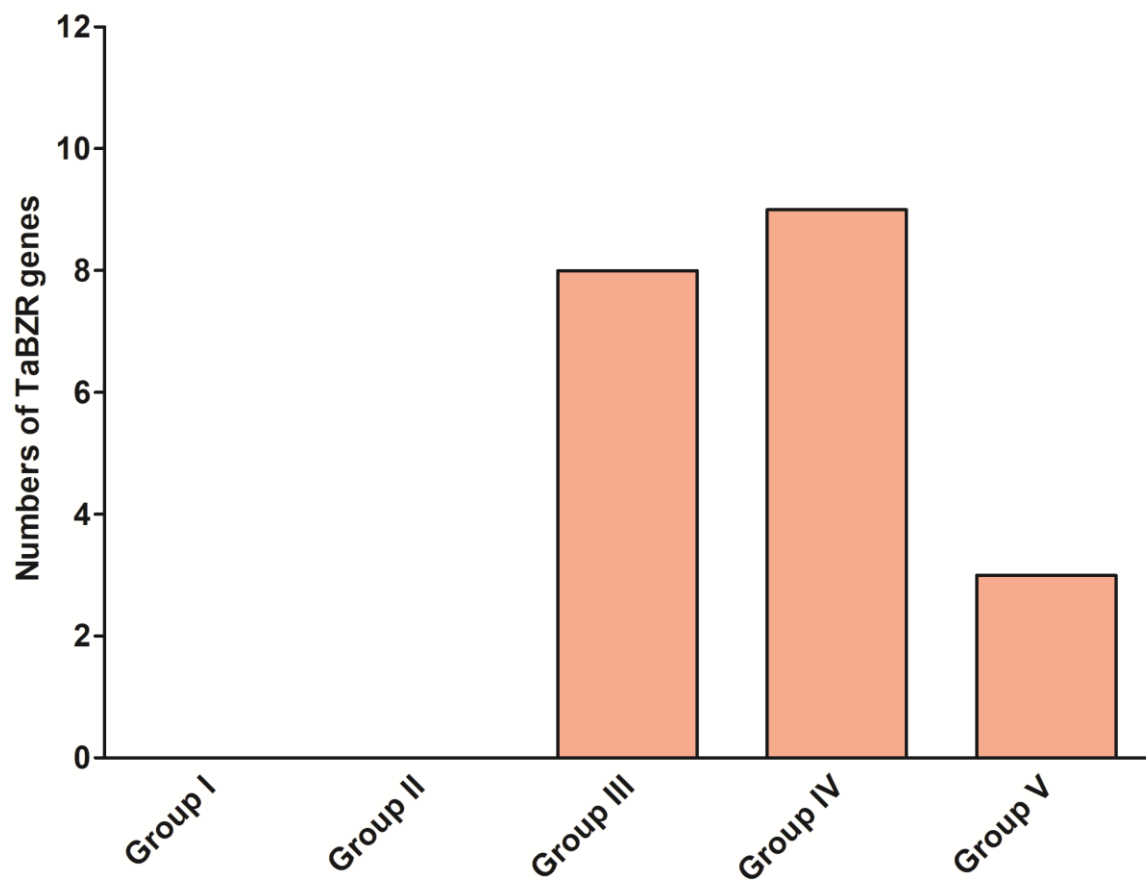

Figure S2. Distribution of *TaBZR* genes in a different group of the phylogenetic tree. The y-axis indicates the number of *TaBZR* genes and x-axis indicates the phylogenetic groups.

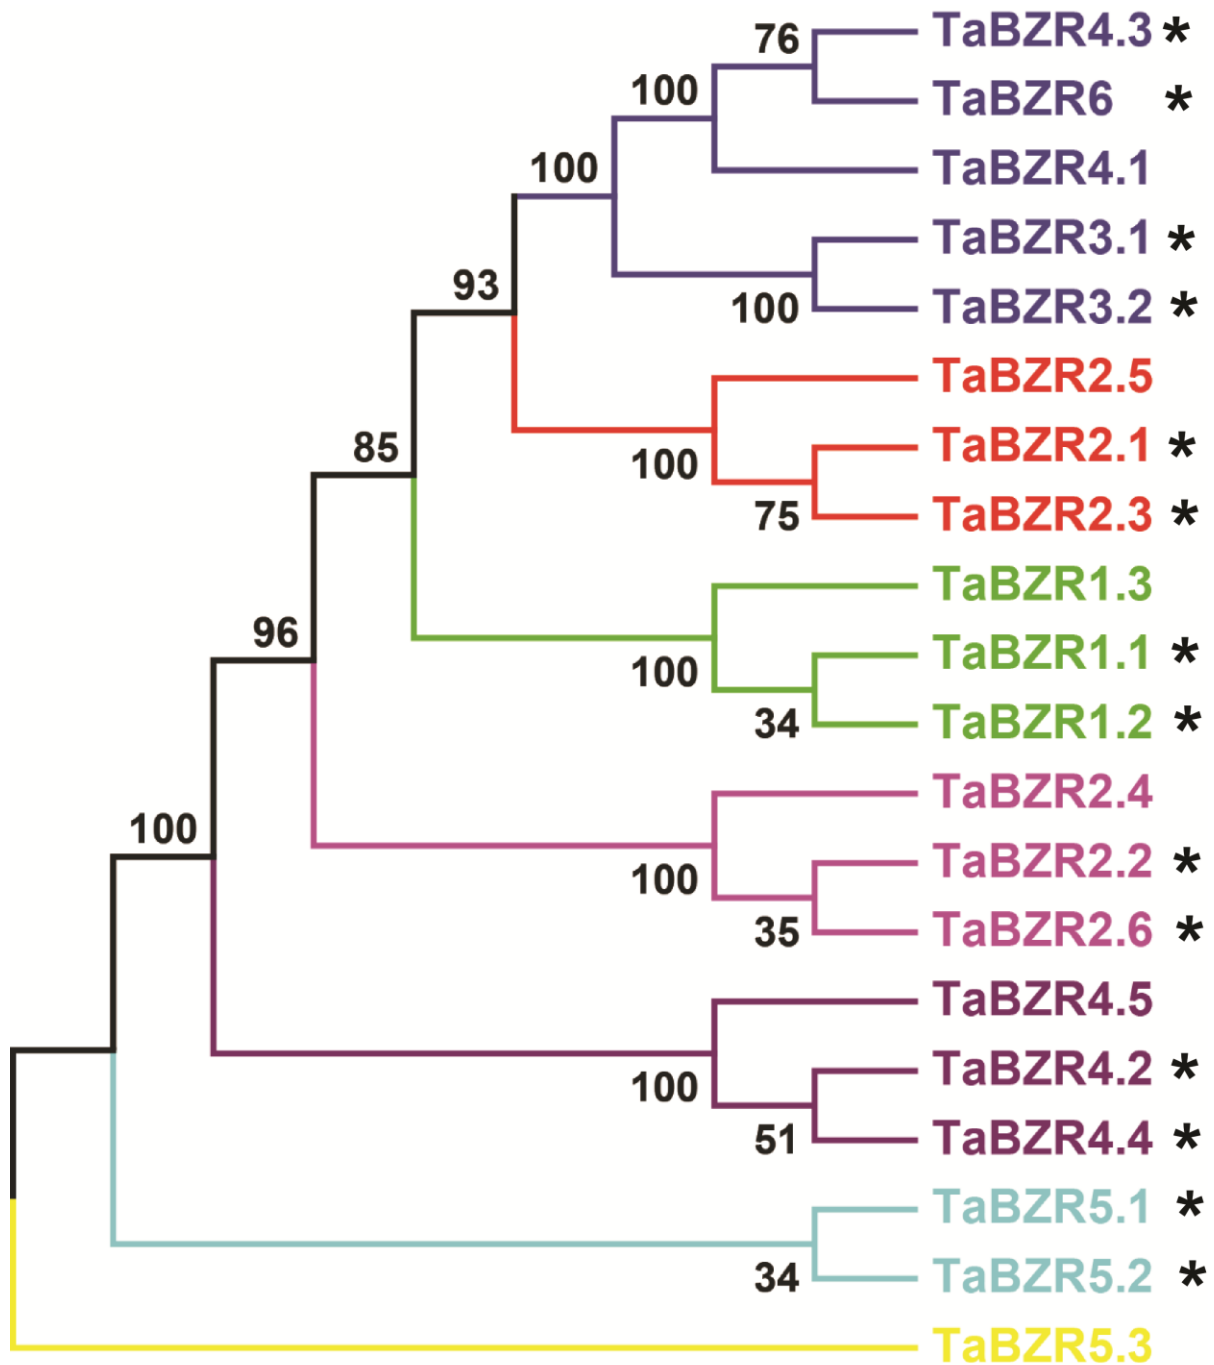

**Figure S3. Phylogenetic analysis of *TaBZR* genes.** A phylogenetic tree was constructed using MEGAX with the neighbor-joining (NJ) method and 1000 bootstrap replications. A black asterisk indicates the duplicated genes.

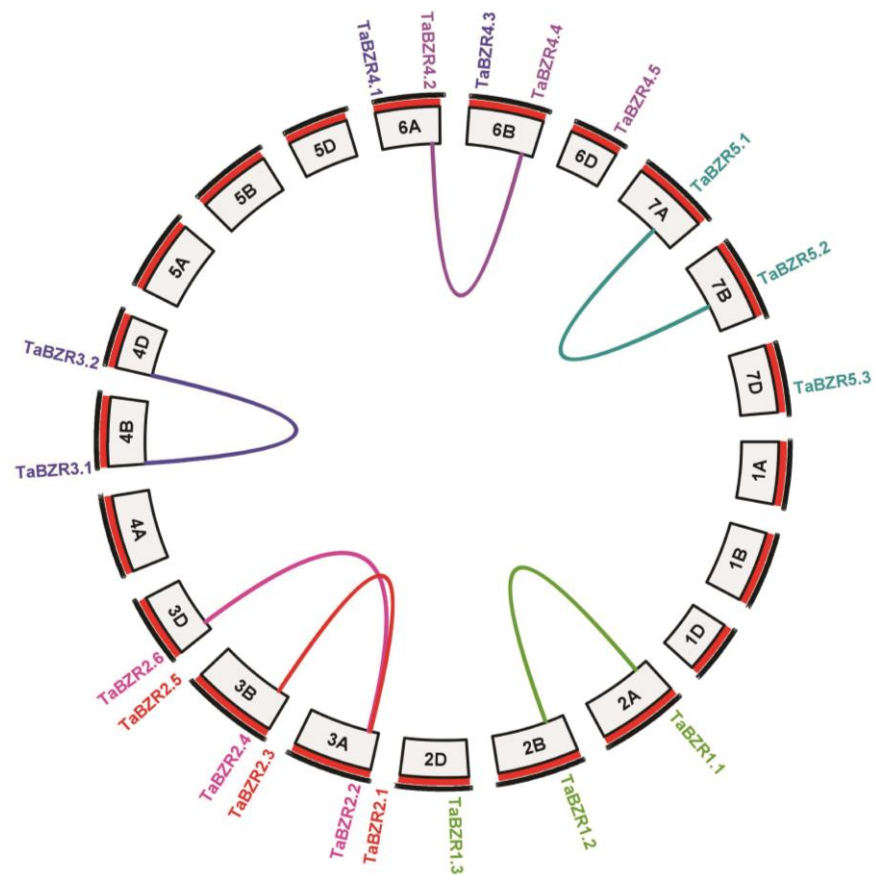

**Figure S4. Chromosomal distribution and duplicated BZR gene pairs in wheat.** Duplicated BZR gene pairs are connected with lines with distinct colors. The figure was generated using TB tools.

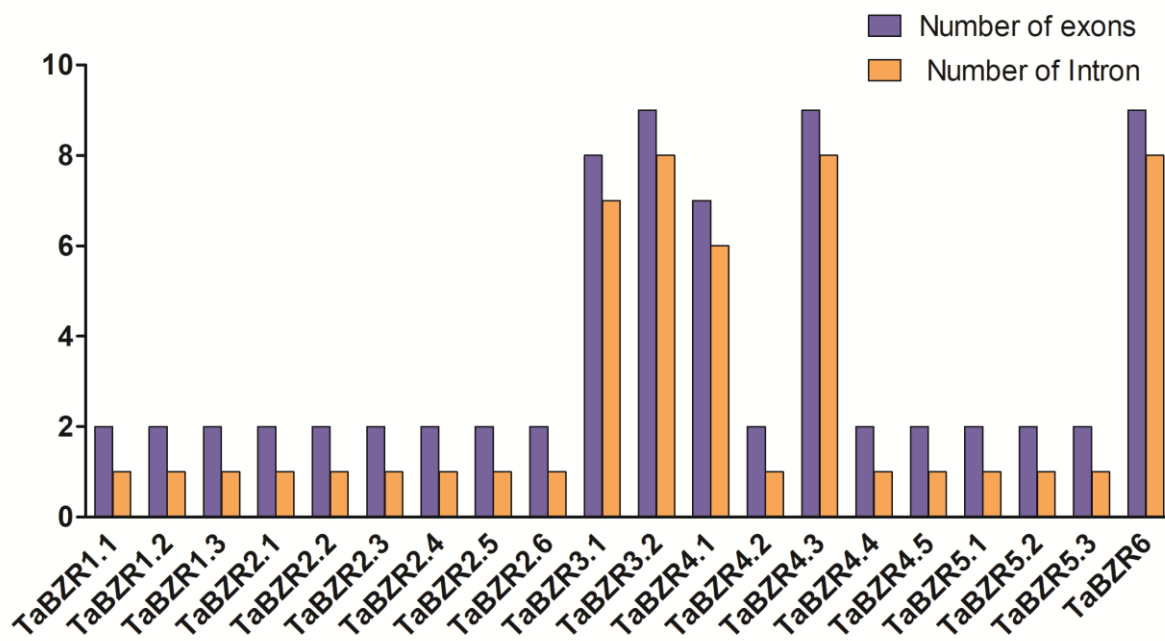

**Figure S5. Distribution of exon and introns in *TaBZR*s gene family.** The y-axis indicates the number of exon and introns and x-axis indicates the *TaBZR* genes. Exons and introns are represented by purple and orange boxes, respectively.

A

|            | *                         | 20                                                   | *                       | 40                 | *                | 60 |    |
|------------|---------------------------|------------------------------------------------------|-------------------------|--------------------|------------------|----|----|
| TaBZR1.1 : | -----                     | MTSGAARAA                                            | -----                   | AAAEAEAGLGRTPIW    | :                | 24 |    |
| TaBZR1.2 : | -----                     | MTSGAARAA                                            | -----                   | AAAEADAGLGRTPIW    | :                | 24 |    |
| TaBZR1.3 : | -----                     | MTSGAARAA                                            | -----                   | AAAEADAGLGRTPIW    | :                | 24 |    |
| TaBZR2.1 : | MEGVAKSVVAP--             | MEVAAGAVGEEAMAVAVAAGRRGCIRSTRGFWTVRRQARGGAVKTSLRHPTP | :                       | 63                 |                  |    |    |
| TaBZR2.2 : | -----                     | MATGGGGGG                                            | -----                   | GAADFGAAGGAGGEMPTW | :                | 27 |    |
| TaBZR2.3 : | MEGVAKSIMAP--             | MEVAG-AGREEAEAAEAVAGRRGCIRSTRGFWTVRRQARGGAVKTSLRHPTP | :                       | 62                 |                  |    |    |
| TaBZR2.4 : | -----                     | MATGGGGGG                                            | -----                   | ADFGAAGGAGGEMPTW   | :                | 25 |    |
| TaBZR2.5 : | MEGVAKSIMAP--             | MEVAG-AGEEEAMA--VAAGRRGCIRSTRGFWTVRRQARGGAVKTSLRHPTP | :                       | 60                 |                  |    |    |
| TaBZR2.6 : | -----                     | MATGGGGGGGGGG                                        | -----                   | ADFGAAGGAGGEMPTW   | :                | 29 |    |
| TaBZR3.1 : | MLRLDPGEYDEETMGGAVKEED--- | DSDEEGEEDDFIVA---                                    | GDE--                   | PRPPEQQGRRRGRGRE   | :                | 55 |    |
| TaBZR3.2 : | MLRLDP-----               | MGGAVKEEDGEGEDSDEE-EEEDFIADAAAGDEQHARPE---           | RRRGRGRE                | :                  | 54               |    |    |
| TaBZR4.1 : | MATKHP-----               | HGDADPSTS---                                         | PPPPPSRRPRGFASASTP----- | AAPPPPGRRRGERERE   | :                | 49 |    |
| TaBZR4.2 : | -----                     | -----                                                | -----                   | MASRVPTW           | :                | 8  |    |
| TaBZR4.3 : | MATKHP-----               | HGDADPSTS---                                         | PPPPPSRRPRGFASASNP----- | FAPPPPGRRRGERERE   | :                | 49 |    |
| TaBZR4.4 : | -----                     | -----                                                | -----                   | MASRVPTW           | :                | 8  |    |
| TaBZR4.5 : | -----                     | -----                                                | -----                   | MASRVPTW           | :                | 8  |    |
| TaBZR5.1 : | -----                     | -----                                                | -----                   | MMHGFAGGS---       | GGGGGHGLGGTRVPTW | :  | 25 |
| TaBZR5.2 : | -----                     | -----                                                | -----                   | MMHGFAGGS---       | GGGGGHGLGGTRVPTW | :  | 25 |
| TaBZR5.3 : | -----                     | -----                                                | -----                   | MMHGFAGGS---       | GGGGGHGLGGTRVPTW | :  | 25 |
| TaBZR6 :   | MATKHP-----               | HGDADPSTS---                                         | PPPPPSRRPRGFASASTP----- | AAPPPPGRRRGERERE   | :                | 49 |    |

### BES1\_N/ DUF822 Domain

|            | *                | 80           | *            | 100       | *        | 120 | *   |  |
|------------|------------------|--------------|--------------|-----------|----------|-----|-----|--|
| TaBZR1.1 : | FERENNNRRRRRRRAA | AKIFTSLALNKE | KKHCINNEVLKE | CREAGWVED | GGTTYRKG | :   | 89  |  |
| TaBZR1.2 : | FERENNNRRRRRRRAA | AKIFTSLALNKE | KKHCINNEVLKE | CREAGWVED | GGTTYRKG | :   | 89  |  |
| TaBZR1.3 : | FERENNNRRRRRRRAA | AKIFTSLALNKE | KKHCINNEVLKE | CREAGWVED | GGTTYRKG | :   | 89  |  |
| TaBZR2.1 : | FERENNNRRRRRRRAA | AKIFTSLALNKE | KKHCINNEVLKE | CREAGWVED | GGTTYRKG | :   | 89  |  |
| TaBZR2.2 : | FERENNNRRRRRRRAA | AKIFTSLALNKE | KKHCINNEVLKE | CREAGWVED | GGTTYRKG | :   | 92  |  |
| TaBZR2.3 : | FERENNNRRRRRRRAA | AKIFTSLALNKE | KKHCINNEVLKE | CREAGWVED | GGTTYRKG | :   | 90  |  |
| TaBZR2.4 : | FERENNNRRRRRRRAA | AKIFTSLALNKE | KKHCINNEVLKE | CREAGWVED | GGTTYRKG | :   | 90  |  |
| TaBZR2.5 : | FERENNNRRRRRRRAA | AKIFTSLALNKE | KKHCINNEVLKE | CREAGWVED | GGTTYRKG | :   | 94  |  |
| TaBZR2.6 : | FERENNNRRRRRRRAA | AKIFTSLALNKE | KKHCINNEVLKE | CREAGWVED | GGTTYRKG | :   | 94  |  |
| TaBZR3.1 : | FKERTILRRRRRRRAA | AKIFTSLALNKE | KKHCINNEVLKE | CREAGWVED | GGTTYRKG | :   | 115 |  |
| TaBZR3.2 : | FKERTILRRRRRRRAA | AKIFTSLALNKE | KKHCINNEVLKE | CREAGWVED | GGTTYRKG | :   | 118 |  |
| TaBZR4.1 : | FKERTILRRRRRRRAA | AKIFTSLALNKE | KKHCINNEVLKE | CREAGWVED | GGTTYRKG | :   | 114 |  |
| TaBZR4.2 : | FKERTILRRRRRRRAA | AKIFTSLALNKE | KKHCINNEVLKE | CREAGWVED | GGTTYRKG | :   | 73  |  |
| TaBZR4.3 : | FKERTILRRRRRRRAA | AKIFTSLALNKE | KKHCINNEVLKE | CREAGWVED | GGTTYRKG | :   | 114 |  |
| TaBZR4.4 : | FERENNNRRRRRRRAA | AKIFTSLALNKE | KKHCINNEVLKE | CREAGWVED | GGTTYRKG | :   | 73  |  |
| TaBZR4.5 : | FERENNNRRRRRRRAA | AKIFTSLALNKE | KKHCINNEVLKE | CREAGWVED | GGTTYRKG | :   | 73  |  |
| TaBZR5.1 : | FERENNNRRRRRRRAA | AKIFTSLALNKE | KKHCINNEVLKE | CREAGWVED | GGTTYRKG | :   | 90  |  |
| TaBZR5.2 : | FERENNNRRRRRRRAA | AKIFTSLALNKE | KKHCINNEVLKE | CREAGWVED | GGTTYRKG | :   | 90  |  |
| TaBZR5.3 : | FERENNNRRRRRRRAA | AKIFTSLALNKE | KKHCINNEVLKE | CREAGWVED | GGTTYRKG | :   | 90  |  |
| TaBZR6 :   | FKERTILRRRRRRRAA | AKIFTSLALNKE | KKHCINNEVLKE | CREAGWVED | GGTTYRKG | :   | 114 |  |

|            | 140 | *                                     | 160               | *               | 180           | * |       |
|------------|-----|---------------------------------------|-------------------|-----------------|---------------|---|-------|
| TaBZR1.1 : | P   | -----                                 |                   |                 |               |   | : 90  |
| TaBZR1.2 : | P   | -----                                 |                   |                 |               |   | : 90  |
| TaBZR1.3 : | P   | -----                                 |                   |                 |               |   | : 90  |
| TaBZR2.1 : | E   | -----                                 |                   |                 |               |   | : 127 |
| TaBZR2.2 : | P   | -----                                 |                   |                 |               |   | : 93  |
| TaBZR2.3 : | E   | -----                                 |                   |                 |               |   | : 126 |
| TaBZR2.4 : | P   | -----                                 |                   |                 |               |   | : 91  |
| TaBZR2.5 : | E   | -----                                 |                   |                 |               |   | : 124 |
| TaBZR2.6 : | P   | -----                                 |                   |                 |               |   | : 95  |
| TaBZR3.1 : |     | -----SSSHP-----                       |                   |                 |               |   | : 120 |
| TaBZR3.2 : | T   | PRFAMLAFAISLSSPSAAAAALPTLLFVSSSSCAPGI | AVPPLAARPISRRAGCA | FALRTAAASS      |               |   | : 183 |
| TaBZR4.1 : | P   | S-----LPPFAQFGAFQATSLET               | FVFTNSINSYAIGT    | PIDSQASALQTDDSL | SPSSILDSVVVAE |   | : 174 |
| TaBZR4.2 : | P   | -----                                 |                   |                 |               |   | : 74  |
| TaBZR4.3 : | P   | P-----LPPFAQFGAFQATSLET               | FVFTNSINSYAIGT    | PLDSQASALQTDDSL | SPSSILDSVVVAE |   | : 174 |
| TaBZR4.4 : | P   | P-----                                |                   |                 |               |   | : 75  |
| TaBZR4.5 : | P   | -----                                 |                   |                 |               |   | : 74  |
| TaBZR5.1 : | P   | -----                                 |                   |                 |               |   | : 91  |
| TaBZR5.2 : | P   | -----                                 |                   |                 |               |   | : 91  |
| TaBZR5.3 : | P   | -----                                 |                   |                 |               |   | : 91  |
| TaBZR6 :   | P   | P-----LPSEFAQFGAFQATSLET              | FVFTNSINSYAIGT    | PLDSQASALQTDDSL | SPSSILDSVVVAE |   | : 174 |

|            | 200 | *                 | 220              | *               | 240            | * | 260     |       |
|------------|-----|-------------------|------------------|-----------------|----------------|---|---------|-------|
| TaBZR1.1 : |     |                   |                  |                 |                |   | PSSGPF  | : 96  |
| TaBZR1.2 : |     |                   |                  |                 |                |   | PSSGPF  | : 96  |
| TaBZR1.3 : |     |                   |                  |                 |                |   | PSSGPF  | : 96  |
| TaBZR2.1 : |     |                   |                  |                 |                |   |         | : -   |
| TaBZR2.2 : |     |                   |                  |                 |                |   | AERMD   | : 98  |
| TaBZR2.3 : |     |                   |                  |                 |                |   |         | : -   |
| TaBZR2.4 : |     |                   |                  |                 |                |   | AERMD   | : 96  |
| TaBZR2.5 : |     |                   |                  |                 |                |   |         | : -   |
| TaBZR2.6 : |     |                   |                  |                 |                |   | AERMD   | : 100 |
| TaBZR3.1 : |     |                   |                  |                 |                |   |         | : -   |
| TaBZR3.2 : | P   | FAVSRVPEGGFASPLLA | VFPDDEDADAAMDGGD | GGEQTGLATREAVAP | PRPPPERDFAGTPY |   |         | : 248 |
| TaBZR4.1 : | Q   | SIKNESYGNSSSANSIN | CMGSDQLLRASAVWAG | -----           |                |   | DFTKTPY | : 215 |
| TaBZR4.2 : |     |                   |                  |                 |                |   | VTAEGTN | : 81  |
| TaBZR4.3 : | Q   | SIKNESYGNSSSANSIN | CMGSDQLLRASAVWAG | -----           |                |   | DFTKTPY | : 215 |
| TaBZR4.4 : |     |                   |                  |                 |                |   | AAAEKAN | : 82  |
| TaBZR4.5 : |     |                   |                  |                 |                |   | IAAEKAN | : 81  |
| TaBZR5.1 : |     |                   |                  |                 |                |   | PPQARP  | : 97  |
| TaBZR5.2 : |     |                   |                  |                 |                |   | PPQVRP  | : 97  |
| TaBZR5.3 : |     |                   |                  |                 |                |   | PPQART  | : 97  |
| TaBZR6 :   | Q   | SIKNESYGNSSSANSIN | CMGSDQLLRASAVCAG | -----           |                |   | DFTKTPY | : 215 |



|          |   | *                  | 280                                                   | *         | 300                              | *            | 320 |     |
|----------|---|--------------------|-------------------------------------------------------|-----------|----------------------------------|--------------|-----|-----|
| TaBZR1.1 | : | GGVSSAGMSPCSS      | SQLLSAPS-----                                         | SSFP      | FVPSYHASFASS-----                | SFPSPTRIDNPS | :   | 146 |
| TaBZR1.2 | : | GGVSSAGMSPCSS      | SQLLSAPS-----                                         | SSFP      | FVPSYHASFASS-----                | SFPSPTRIDNPS | :   | 146 |
| TaBZR1.3 | : | GGVSSAGMSPCSS      | SQLLSAPS-----                                         | SSFP      | FVPSYHASFASS-----                | SFPSPTRIDNPS | :   | 146 |
| TaBZR2.1 | : | --VSTDFGASCSS      | GHL-----                                              | QPS       | SHSHSVATEATAG-----               |              | :   | 157 |
| TaBZR2.2 | : | GIGCSVSPSPCSS      | YQPSPRASYNASPTSS                                      | SFP       | GASSPFLPHSNN--MVNGVDATPILEWLQTFS |              | :   | 161 |
| TaBZR2.3 | : | --RSPGVGASGSS      | DHL-----                                              | QPS       | SHSG--ATEATAG-----               |              | :   | 154 |
| TaBZR2.4 | : | GIGCSVSPSPCSS      | YQPSPRASYNASPTSS                                      | SFP       | GASSPFLPHSNN--MVNGVDATPILEWLQTFS |              | :   | 159 |
| TaBZR2.5 | : | --RSSGAGTGGSS      | DHP-----                                              | QPS       | SHSG--ATEATAG-----               |              | :   | 152 |
| TaBZR2.6 | : | GIGCSVSPSPCSS      | YQPSPRASYNASPTSS                                      | SFP       | GASSPFLPHSNN--MVNGVDATPILEWLQTFS |              | :   | 163 |
| TaBZR3.1 | : | -----QLGVV         | VKGEVAEAEDEIVAQLRVLKAAGVDGVMVDCWGWGVEAHRPQEYNWAGYKRLF |           |                                  |              | :   | 178 |
| TaBZR3.2 | : | VFVYVMLPLGVV       | VKGEVAEAEDEIVAQLRVLKAAGVDGVMVDCWGWGVEAHRPQEYNWAGYKRLF |           |                                  |              | :   | 313 |
| TaBZR4.1 | : | IFVYASLSMGIINCYCQI | VDPEAVRAELRHLK                                        | INVDGVVVD | CWGWGIVEAWTPQKYEWSGYRDLF         |              | :   | 280 |
| TaBZR4.2 | : | FMVRSGPS           | SPCSHQVSPRA-----                                      | SFPT      | SGTSSHTTLGGGR--GSCYEGGSLIFWLKNLS |              | :   | 135 |
| TaBZR4.3 | : | IFVYASLSMGIINCYCQI | VDPEAVRAELRHLK                                        | INVDGVVVD | CWGWGIVEAWTPQKYEWSGYRDLF         |              | :   | 280 |
| TaBZR4.4 | : | FVVRSGSR           | SPCSHFVSPRAPYNPRAGPST                                 | TFPT      | SGTSSHTTLGGG---SSYIEGSSSFIWLNLS  |              | :   | 144 |
| TaBZR4.5 | : | FMVRSGPS           | SPCSHQVSPRA-----                                      | SFPT      | SGTSSHTTLGGGGSGSYIEGSSSFIWLNLS   |              | :   | 137 |
| TaBZR5.1 | : | DEMRASAS           | SPCSYQPSPRASYNPSFASS                                  | SFP       | SGSSSHITLGGGNNFIGGVEGSSLIWLNLS   |              | :   | 162 |
| TaBZR5.2 | : | DEMRASAS           | SPCSYQPSPRASYNPSFASS                                  | SFP       | SGSSSHITLGGGNNFIGGVEGSSLIWLNLS   |              | :   | 162 |
| TaBZR5.3 | : | DEMRASAS           | SPCSYQPSPRASYNPSFASS                                  | SFP       | SGSSSHITLGGGNNFIGGVEGSSLIWLNLS   |              | :   | 162 |
| TaBZR6   | : | IFVYASLSMGIINCYCQI | VDPEAVRAELRHLK                                        | INVDGVVVD | CWGWGIVEAWTPQKYEWSGYRDLF         |              | :   | 280 |

### Serine rich phosphorylation sites

|          |   | *            | 340                   | *    | 360           | *                   | 380            | *             |               |
|----------|---|--------------|-----------------------|------|---------------|---------------------|----------------|---------------|---------------|
| TaBZR1.1 | : | FACLLPFLRGL  | ENLPPLRV-----         | NSA  | VTTPPLSSE     | TASRP-----          | PKILKED        | VEVDP         | : 195         |
| TaBZR1.2 | : | FACLLPFLRGL  | ENLPPLRV-----         | NSA  | VTTPPLSSE     | TASRP-----          | PKILKED        | VEVDP         | : 195         |
| TaBZR1.3 | : | FACLLPFLRGL  | ENLPPLRV-----         | NSA  | VTTPPLSSE     | TASRP-----          | PKILKED        | VEVDP         | : 195         |
| TaBZR2.1 | : | -----        | -----                 | GHQ  | ALLEPEAE      | -----               | -----          | -----         | : 170         |
| TaBZR2.2 | : | NS---        | TASNKRPHLPPLLI---     | HGGS | ISA           | VTTPPLSSE           | TARTPRMKTW---  | DESVIQ        | PEFHGSN : 217 |
| TaBZR2.3 | : | -----        | -----                 | DH   | QALLEPEAE     | -----               | -----          | -----         | : 167         |
| TaBZR2.4 | : | NS---        | TASNKRPHLPPLLI---     | HGGS | ISA           | VTTPPLSSE           | TARTPRMKTW---  | DESVIQ        | PEFHGSN : 215 |
| TaBZR2.5 | : | -----        | -----                 | DH   | QEL--PEAE     | -----               | -----          | -----         | : 163         |
| TaBZR2.6 | : | NS---        | TASNKRPHLPPLLI---     | HGGS | ISA           | VTTPPLSSE           | TARTPRMKTW---  | DESVIQ        | PEFHGSN : 219 |
| TaBZR3.1 | : | HIIRD        | LKLKLVVMSFHGCGGNVGDDV | SI   | IP            | EWVIEIGKSNPD        | IYFTDREGRNTECL | SGIDK         | : 243         |
| TaBZR3.2 | : | HIIRD        | LKLKLVVMSFHGCGGNVGDDV | SI   | IP            | EWVIEIGKSNPD        | IYFTDREGRNTECL | SGIDK         | : 378         |
| TaBZR4.1 | : | GIIKEFKLKVQV | VSFHGSGECGSGGV        | LIAL | PRWVLEIAQENQD | IYFTDREGRNTECL      | SGIDK          | : 345         |               |
| TaBZR4.2 | : | SGSGF        | ASSSKFPRYSPHSY-YFSGGS | ISA  | VTTPSGSE      | -RRMPCINAGWGEYPSAQV | QPF            | FGAG : 198    |               |
| TaBZR4.3 | : | GIIKEFKLKVQV | VSFHGSGECGSGGV        | LIAL | PRWVLEIAQENQD | IYFTDREGRNTECL      | SGIDK          | : 345         |               |
| TaBZR4.4 | : | SGSGF        | ASSSKFPRYSPHSYDYFSGGS | ISA  | VTTPSGSE      | -RRMPCINAGWGEYPSVQV | QPF            | FGAG : 208    |               |
| TaBZR4.5 | : | SGSGF        | PSSSKFPRYSPHSY--FSGGS | ISA  | VTTPSCSE      | -RRMPCINAGWGEYPSAQV | QPF            | FGAG : 199    |               |
| TaBZR5.1 | : | SNPSF        | ASSSKLPQLH-HLY--FNGGS | ISA  | VTTPSSSE      | -THTPRMKTW---       | ESQCVL         | PEFAGAN : 220 |               |
| TaBZR5.2 | : | SNPSF        | ASSSKLPQLH-HLY--FNGGS | ISA  | VTTPSSSE      | -THTPRMKTW---       | ESQCVL         | PEFAGAN : 220 |               |
| TaBZR5.3 | : | SNPSF        | ASSSKLPQLH-HLY--FNGGS | ISA  | VTTPSSSE      | -THTPRMKTW---       | ESQCVL         | PEFAGAN : 220 |               |
| TaBZR6   | : | GIIKEFKLKVQV | VSFHGSGECGSGGV        | LIAL | PRWVLEIAQENQD | IYFTDREGRNTECL      | SGIDK          | : 345         |               |



|          | 400      | *                    | 420                  | *                       | 440                      | *                           |                   |                   |     |     |
|----------|----------|----------------------|----------------------|-------------------------|--------------------------|-----------------------------|-------------------|-------------------|-----|-----|
| TaBZR1.1 | : FR---- | HPFFALSAFASPTRGRRHEH | PDTIPECDESD          | STVDSGRWISFQMATT-----   | A                        | :                           | 246               |                   |     |     |
| TaBZR1.2 | : FR---- | HPFFALSAFASPTRGRRHEH | PDTIPECDESD          | STVDSGRWISFQMATT-----   | A                        | :                           | 246               |                   |     |     |
| TaBZR1.3 | : FR---- | HPFFALSAFASPTRGRRHEH | PDTIPECDESD          | STVDSGRWISFQMATT-----   | A                        | :                           | 246               |                   |     |     |
| TaBZR2.1 | :        | -----                | KHK                  | SLELTLSFSYM-----        | :                        |                             | 185               |                   |     |     |
| TaBZR2.2 | :        | -----                | SPCVVNSTPPSP--G-RQMV | PDP-AWLAGIQSS           | TPSSPTFSIMSSNP--FSVFKEAI | :                           | 270               |                   |     |     |
| TaBZR2.3 | :        | -----                | KHK                  | SLELTLSFSYM-----        | :                        |                             | 182               |                   |     |     |
| TaBZR2.4 | :        | -----                | SPCVVNSTPPSP--G-RQMV | PDP-AWLAGIQSS           | TPSSPTFSIMSSNP--FSVFKEAI | :                           | 268               |                   |     |     |
| TaBZR2.5 | :        | -----                | KHK                  | SLELTLSFTYM-----        | :                        |                             | 178               |                   |     |     |
| TaBZR2.6 | :        | -----                | SPCVVNSTPPSP--G-RQMV | PDP-AWLAGIQSS           | TPSSPTFSIMSSNP--FSVFKEAI | :                           | 272               |                   |     |     |
| TaBZR3.1 | :        | ERVLQGR              | TA                   | VEVYFDFMRSFRVEFDEYFEDGI | ISEIE                    | GLGACGELRYPSYAANHGWKYPGIGEF | :                 | 308               |     |     |
| TaBZR3.2 | :        | ERVLQGR              | TA                   | VEVYFDFMRSFRVEFDEYFEDGI | ISEIE                    | GLGACGELRYPSYAANHGWKYPGIGEF | :                 | 443               |     |     |
| TaBZR4.1 | :        | ERVLRGRTG            | IEVYFDFMRSFHM        | EFRLSEEG                | LISAIE                   | GLGASGELRYPSCPEKMGWRYPGIGEF | :                 | 410               |     |     |
| TaBZR4.2 | :        | GS                   | GYDDYASL             | FNSTPSSPRGG-QGVG        | PDEA                     | AWLSGFCSS                   | AGPSSPTY          | SIMAPSNPFRVSGEMAA | :   | 262 |
| TaBZR4.3 | :        | ERVLRGRTG            | IEVYFDFMRSFHM        | EFRLSEEG                | LISAIE                   | GLGASGELRYPSCPEKMGWRYPGIGEF | :                 | 410               |     |     |
| TaBZR4.4 | :        | GS                   | AYDDYASL             | FNSTPSSPRGG-HGVG        | PDP-AWLSGFCSS            | AGPSSPTY                    | SIMAPSNPFRVSGEMAA | :                 | 271 |     |
| TaBZR4.5 | :        | GS                   | GYDDYASL             | FNSTPSSPRGGSHGVG        | PDP-AWLSGFCSS            | AGPSSPTY                    | SIMAPSSSRVFGEMAA  | :                 | 263 |     |
| TaBZR5.1 | :        | -----                | YTS                  | LENSTPPSP--G-HHVA       | PDP-AWLAGFQSS            | AGPSSPTY                    | NLVSHN-----PFGI   | :                 | 268 |     |
| TaBZR5.2 | :        | -----                | YTS                  | LENSTPPSP--G-HHVA       | PDP-AWLAGFQSS            | AGPSSPTY                    | NLVSHN-----PFGI   | :                 | 268 |     |
| TaBZR5.3 | :        | -----                | YAS                  | LENSTPPSP--G-HHVA       | PDP-AWLAGFQSS            | AGPSSPTY                    | NLVSHN-----PFGI   | :                 | 268 |     |
| TaBZR6   | :        | ERVLRGRTG            | IEVYFDFMRSFHM        | EFRLSEEG                | LISAIE                   | GLGASGELRYPSCPEKMGWRYPGIGEF | :                 | 410               |     |     |

|          | 460            | *                | 480                             | *                              | 500             | *     | 520 |  |
|----------|----------------|------------------|---------------------------------|--------------------------------|-----------------|-------|-----|--|
| TaBZR1.1 | : PTSFAYNIVNLG | ASSNSMEMEG-----  | MAGERGRSGPE                     | EDDKG-----                     | :               |       | 286 |  |
| TaBZR1.2 | : PTSFAYNIVNLG | ASSNSMEMLDG----- | MAGERGRSGPE                     | EDDKG-----                     | :               |       | 286 |  |
| TaBZR1.3 | : PTSFAYNIVNLG | ASSNSMEMDG-----  | MAGERGRSGPE                     | EDDKG-----                     | :               |       | 286 |  |
| TaBZR2.1 | :              | -----            | -----                           | -----                          | -----           | ----- | -   |  |
| TaBZR2.2 | :              | P                | GGGSSRMCTPGQSGTCSFV             | IPG-MARHPDVHMDV--VSDE          | AFGSSTNGGA----- | :     | 320 |  |
| TaBZR2.3 | :              | -----            | -----                           | -----                          | -----           | ----- | -   |  |
| TaBZR2.4 | :              | P                | GGGSSRMCTPGQSGTCSFV             | IPG-MARHPDVHMDV--VSDE          | AFGSSTNGGA----- | :     | 318 |  |
| TaBZR2.5 | :              | -----            | -----                           | -----                          | -----           | ----- | -   |  |
| TaBZR2.6 | :              | P                | GGGSSRMCTPGQSGTCSFV             | IPG-MARHPDVHMDV--VSDE          | AFGSSTNGGA----- | :     | 322 |  |
| TaBZR3.1 | :              | QCYDRYLQKNLR     | RFAAEARGHAMWAKSPDNAGHYNSEFNNTGF | CDGGDYDSYYGRFFINWYAQVL         | :               |       | 373 |  |
| TaBZR3.2 | :              | QCYDRYLQKNLR     | RFAAEARGHAMWAKSPDNAGHYNSEFNNTGF | CDGGDYDSYYGRFFINWYAQVL         | :               |       | 508 |  |
| TaBZR4.1 | :              | QCYDRYMQKNLR     | QSALTRGHLFWARGPDNAGYYNSRS       | SHETGFCDGGDYDSYYGRFFINWYSGIL   | :               |       | 475 |  |
| TaBZR4.2 | :              | ATASSSRMRTPC     | QSGTCSFVA---IAVHGDVQMGAR--AEDD  | AFGSG-----                     | :               |       | 305 |  |
| TaBZR4.3 | :              | QCYDRYMQKNLR     | QSALTRGHLFWARGPDNAGYYNSRS       | SHETGFCDGGDYDSYYGRFFINWYSGIL   | :               |       | 475 |  |
| TaBZR4.4 | :              | ATASSSRMRTPC     | QSGTCSFVA---IAAHGDVQMEHR--EADD  | AFGSG-----                     | :               |       | 314 |  |
| TaBZR4.5 | :              | ATAGSSRMCTFA     | QSGTCSFVM---IAVHGDVQMGAR--AEDD  | AFGSG-----                     | :               |       | 306 |  |
| TaBZR5.1 | :              | ALASSSR          | ACTPGQSGTCSFVMGDHAF             | FAHHDVQMEMADGAPDDAFGSNSNG----- | :               |       | 319 |  |
| TaBZR5.2 | :              | ALASSSR          | ACTPGQSGTCSFVMGDHAF             | FAHHDVQMEMVEGAADDAFGSNSNG----- | :               |       | 319 |  |
| TaBZR5.3 | :              | ALASSSR          | VCTPGQSGTCSFAMGDHAF             | FAHHDVQMEMVEGAADDAFGSNSNG----- | :               |       | 319 |  |
| TaBZR6   | :              | QCYDRYMQKNLR     | QSALARGHLFWARGPDNAGYYNSRS       | SHETGFCDGGDYDSYYGRFFINWYSGIL   | :               |       | 475 |  |

|            | *         | 540                                                                                                                                                             | *      | 560                                                            | *                             | 580 |       |
|------------|-----------|-----------------------------------------------------------------------------------------------------------------------------------------------------------------|--------|----------------------------------------------------------------|-------------------------------|-----|-------|
| TaBZR1.1 : | -----     | RVTFW <del>EG</del> ER <del>I</del> HEVA-----                                                                                                                   | AEE--  | LE <del>LT</del> LG <del>V</del> GSK-----                      |                               |     | : 313 |
| TaBZR1.2 : | -----     | RVTFW <del>EG</del> ER <del>I</del> HEVA-----                                                                                                                   | AEE--  | LE <del>LT</del> LG <del>V</del> GSK-----                      |                               |     | : 313 |
| TaBZR1.3 : | -----     | RVTFW <del>EG</del> ER <del>I</del> HEVA-----                                                                                                                   | AEE--  | LE <del>LT</del> LG <del>V</del> GSK-----                      |                               |     | : 313 |
| TaBZR2.1 : | -----     |                                                                                                                                                                 |        |                                                                |                               |     | : -   |
| TaBZR2.2 : | ---       | QCATAGLVR <del>AW</del> EG <del>ER</del> I <del>H</del> EDS-----                                                                                                | GSD--  | ELE <del>LT</del> L-----                                       | GSSRT <del>RS</del> -----     |     | : 356 |
| TaBZR2.3 : | ---       |                                                                                                                                                                 |        |                                                                |                               |     | : -   |
| TaBZR2.4 : | ---       | QCATAGLVR <del>AW</del> EG <del>ER</del> I <del>H</del> EDS-----                                                                                                | GSD--  | ELE <del>LT</del> L-----                                       | GSSRT <del>RS</del> -----     |     | : 354 |
| TaBZR2.5 : | ---       |                                                                                                                                                                 |        |                                                                |                               |     | : -   |
| TaBZR2.6 : | ---       | QCATAGLVR <del>AW</del> EG <del>ER</del> I <del>H</del> EDS-----                                                                                                | GSD--  | ELE <del>LT</del> L-----                                       | GSSRT <del>RS</del> -----     |     | : 358 |
| TaBZR3.1 : | LDHADRVLM | LARI <del>A</del> EG <del>S</del> A <del>I</del> AVKVSGIHWWYK <del>T</del> ASHAA <del>E</del> L <del>T</del> AGFYNPCN <del>R</del> DGYAPIA <del>Q</del> VLKKHGA |        |                                                                |                               |     | : 438 |
| TaBZR3.2 : | LDHADRVLM | LARI <del>A</del> EG <del>S</del> A <del>I</del> AVKVSGIHWWYK <del>T</del> ASHAA <del>E</del> L <del>T</del> AGFYNPCN <del>R</del> DGYAPIA <del>Q</del> VLKKHGA |        |                                                                |                               |     | : 573 |
| TaBZR4.1 : | IDHVDQVLS | LATIA <del>E</del> DCAA <del>I</del> VVKIPSIYWWR <del>T</del> ASHAA <del>E</del> L <del>T</del> AGFYNP <del>T</del> N <del>R</del> DGYSFVFRMLKKHSI              |        |                                                                |                               |     | : 540 |
| TaBZR4.2 : | -----     | GRFVS <del>V</del> N <del>AW</del> EG <del>ER</del> I <del>H</del> EV <del>C</del> -----                                                                        | ASDEPE | L <del>DT</del> LGL <del>G</del> SSN <del>T</del> FRASALN----- |                               |     | : 347 |
| TaBZR4.3 : | IDHVDQVLS | LATIA <del>E</del> DCAA <del>I</del> VVKIPSIYWWR <del>T</del> ASHAA <del>E</del> L <del>T</del> AGFYNP <del>T</del> N <del>R</del> DGYSFVFRMLKKHSI              |        |                                                                |                               |     | : 540 |
| TaBZR4.4 : | -----     | GRFVL <del>V</del> N <del>AW</del> EG <del>ER</del> I <del>H</del> EV <del>C</del> -----                                                                        | ASDEHE | L <del>DT</del> LGL <del>G</del> SSK <del>T</del> FRAGAVN----- |                               |     | : 356 |
| TaBZR4.5 : | -----     | GRFVS <del>V</del> N <del>AW</del> EG <del>ER</del> I <del>H</del> EV <del>C</del> -----                                                                        | ASDEPE | L <del>DT</del> LGL <del>G</del> SSK <del>T</del> FRAGAVN----- |                               |     | : 348 |
| TaBZR5.1 : | ---       | NNGSPGLV <del>K</del> A <del>W</del> EG <del>ER</del> I <del>H</del> EE <del>C</del> -----                                                                      | ASD--  | ELE <del>LT</del> L-----                                       | GSSRT <del>R</del> GEQPF----- |     | : 359 |
| TaBZR5.2 : | ---       | NNGSPGLV <del>K</del> A <del>W</del> EG <del>ER</del> I <del>H</del> EE <del>C</del> -----                                                                      | ASD--  | ELE <del>LT</del> L-----                                       | GSSRT <del>R</del> GEPPF----- |     | : 359 |
| TaBZR5.3 : | ---       | NNGSPGLV <del>K</del> A <del>W</del> EG <del>ER</del> I <del>H</del> EE <del>C</del> -----                                                                      | ASD--  | ELE <del>LT</del> L-----                                       | GSSRT <del>R</del> GEPPF----- |     | : 359 |
| TaBZR6 :   | IDHVDQVLS | LATIA <del>E</del> DCAA <del>I</del> VVKIPSIYWWR <del>T</del> ASHAA <del>E</del> L <del>T</del> AGFYNP <del>T</del> N <del>R</del> DGYSFVFRMLKKHSI              |        |                                                                |                               |     | : 540 |

### C-terminal domain

|            | *         | 600                                                                                                                       | * | 620 | * | 640 | * |       |
|------------|-----------|---------------------------------------------------------------------------------------------------------------------------|---|-----|---|-----|---|-------|
| TaBZR1.1 : | -----     |                                                                                                                           |   |     |   |     |   | : -   |
| TaBZR1.2 : | -----     |                                                                                                                           |   |     |   |     |   | : -   |
| TaBZR1.3 : | -----     |                                                                                                                           |   |     |   |     |   | : -   |
| TaBZR2.1 : | -----     |                                                                                                                           |   |     |   |     |   | : -   |
| TaBZR2.2 : | -----     |                                                                                                                           |   |     |   |     |   | : -   |
| TaBZR2.3 : | -----     |                                                                                                                           |   |     |   |     |   | : -   |
| TaBZR2.4 : | -----     |                                                                                                                           |   |     |   |     |   | : -   |
| TaBZR2.5 : | -----     |                                                                                                                           |   |     |   |     |   | : -   |
| TaBZR2.6 : | -----     |                                                                                                                           |   |     |   |     |   | : -   |
| TaBZR3.1 : | AINFTCVEL | RTMDQHEVYPEALADPEGLVWQ <del>V</del> INA <del>A</del> WDAGIQ <del>V</del> ASENALPCYDRDGFNKTLEN <del>A</del> K              |   |     |   |     |   | : 503 |
| TaBZR3.2 : | AINFTCVEL | RTMDQHEVYPEALADPEGLVWQ <del>V</del> INA <del>A</del> WDAGIQ <del>V</del> ASENALPCYDRDGFNKTLEN <del>A</del> K              |   |     |   |     |   | : 638 |
| TaBZR4.1 : | ILKVVCYG  | PEFTVQEND--EAFADPEGLTWQ <del>V</del> MNA <del>A</del> WDHGLSVSVESALPCLD <del>V</del> DMYSRILD <del>T</del> AK             |   |     |   |     |   | : 603 |
| TaBZR4.2 : | -----     |                                                                                                                           |   |     |   |     |   | : -   |
| TaBZR4.3 : | ILKVVCYG  | PEFTVQENG--EAFADPEGLTWQ <del>V</del> MNA <del>A</del> WDHGLSVSVESL <del>P</del> CLD <del>V</del> DMYSRILD <del>T</del> AK |   |     |   |     |   | : 603 |
| TaBZR4.4 : | -----     |                                                                                                                           |   |     |   |     |   | : -   |
| TaBZR4.5 : | -----     |                                                                                                                           |   |     |   |     |   | : -   |
| TaBZR5.1 : | -----     |                                                                                                                           |   |     |   |     |   | : -   |
| TaBZR5.2 : | -----     |                                                                                                                           |   |     |   |     |   | : -   |
| TaBZR5.3 : | -----     |                                                                                                                           |   |     |   |     |   | : -   |
| TaBZR6 :   | ILKVVCYG  | PEFTVQEND--EAFADPEGLTWQ <del>V</del> MNA <del>A</del> WDHGLSVSVESALPCLD <del>V</del> DMYSRILD <del>T</del> AK             |   |     |   |     |   | : 603 |

|            | 660                                                              | * | 680 | * | 700 | * |   |     |
|------------|------------------------------------------------------------------|---|-----|---|-----|---|---|-----|
| TaBZR1.1 : | -----                                                            |   |     |   |     |   | : | -   |
| TaBZR1.2 : | -----                                                            |   |     |   |     |   | : | -   |
| TaBZR1.3 : | -----                                                            |   |     |   |     |   | : | -   |
| TaBZR2.1 : | -----                                                            |   |     |   |     |   | : | -   |
| TaBZR2.2 : | -----                                                            |   |     |   |     |   | : | -   |
| TaBZR2.3 : | -----                                                            |   |     |   |     |   | : | -   |
| TaBZR2.4 : | -----                                                            |   |     |   |     |   | : | -   |
| TaBZR2.5 : | -----                                                            |   |     |   |     |   | : | -   |
| TaBZR2.6 : | -----                                                            |   |     |   |     |   | : | -   |
| TaBZR3.1 : | PRNDPDGRHLFGFTYLRLCSTLFE-GENLPEFERFVKRMHGEAVHDLRA-----           |   |     |   |     |   | : | 551 |
| TaBZR3.2 : | PRNDPDGRHLFGFTYLRLCSTLFE-GENLPEFERFVKRMHGEAVHDLRA-----           |   |     |   |     |   | : | 686 |
| TaBZR4.1 : | PRNDPDRHHLSTFFAYRQRTPFLLQRDVCFSELETFVKCMHGEATQNFVD-----          |   |     |   |     |   | : | 652 |
| TaBZR4.2 : | -----                                                            |   |     |   |     |   | : | -   |
| TaBZR4.3 : | PRNDPDRHHLSTFFAYRQRTPFLLQRDAFSELETFVKCMHELCLTYCSLRSANFRIPFVAIARL |   |     |   |     |   | : | 668 |
| TaBZR4.4 : | -----                                                            |   |     |   |     |   | : | -   |
| TaBZR4.5 : | -----                                                            |   |     |   |     |   | : | -   |
| TaBZR5.1 : | -----                                                            |   |     |   |     |   | : | -   |
| TaBZR5.2 : | -----                                                            |   |     |   |     |   | : | -   |
| TaBZR5.3 : | -----                                                            |   |     |   |     |   | : | -   |
| TaBZR6 :   | PRNDPDRHHLSTFFAYRQRTPFLLQRDVCFSELETFVKCMHGEATQNFVD-----          |   |     |   |     |   | : | 652 |

|            |        |     |   |
|------------|--------|-----|---|
| TaBZR1.1 : | ----   | :   | - |
| TaBZR1.2 : | ----   | :   | - |
| TaBZR1.3 : | ----   | :   | - |
| TaBZR2.1 : | ----   | :   | - |
| TaBZR2.2 : | ----   | :   | - |
| TaBZR2.3 : | ----   | :   | - |
| TaBZR2.4 : | ----   | :   | - |
| TaBZR2.5 : | ----   | :   | - |
| TaBZR2.6 : | ----   | :   | - |
| TaBZR3.1 : | ----   | :   | - |
| TaBZR3.2 : | ----   | :   | - |
| TaBZR4.1 : | ----   | :   | - |
| TaBZR4.2 : | ----   | :   | - |
| TaBZR4.3 : | NSYC : | 672 |   |
| TaBZR4.4 : | ----   | :   | - |
| TaBZR4.5 : | ----   | :   | - |
| TaBZR5.1 : | ----   | :   | - |
| TaBZR5.2 : | ----   | :   | - |
| TaBZR5.3 : | ----   | :   | - |
| TaBZR6 :   | ----   | :   | - |



**B**

**TaBZR1.1**

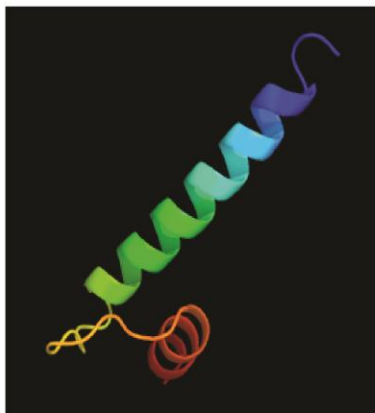

**TaBZR1.2**

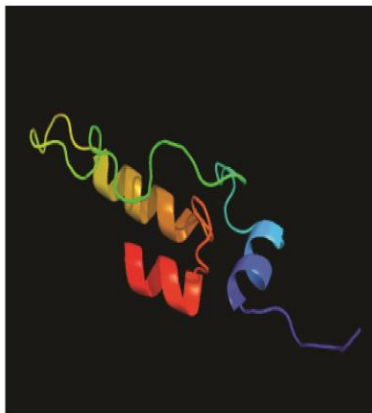

**TaBZR2.1**

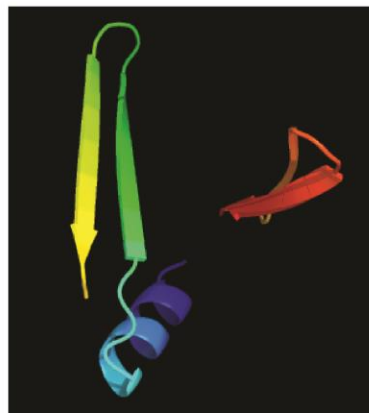

**TaBZR2.2**

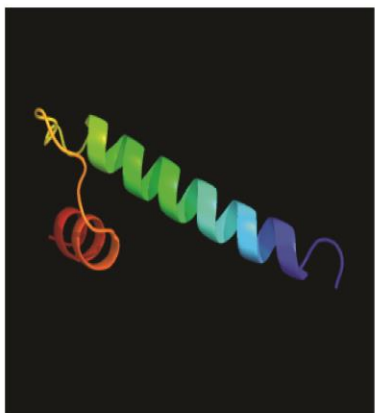

**TaBZR2.3**

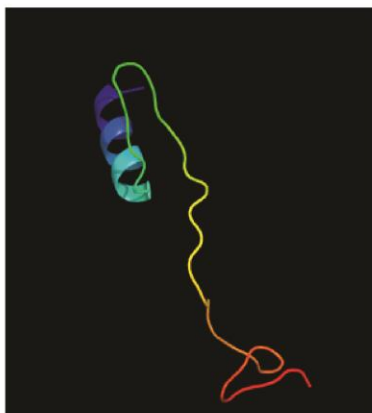

**TaBZR2.4**

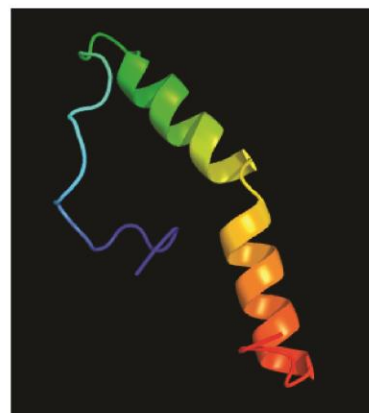

**TaBZR2.5**

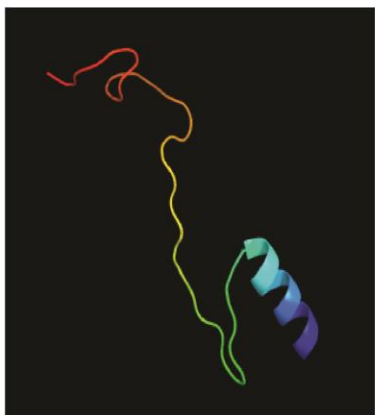

**TaBZR2.6**

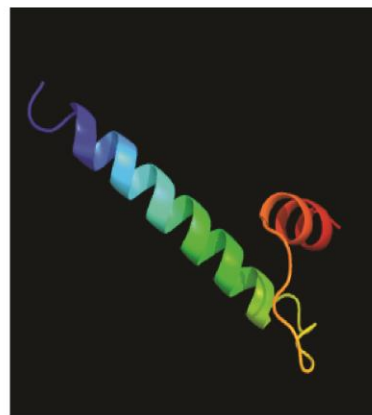

**TaBZR3.1**

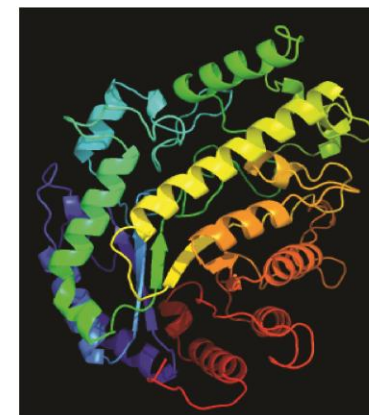

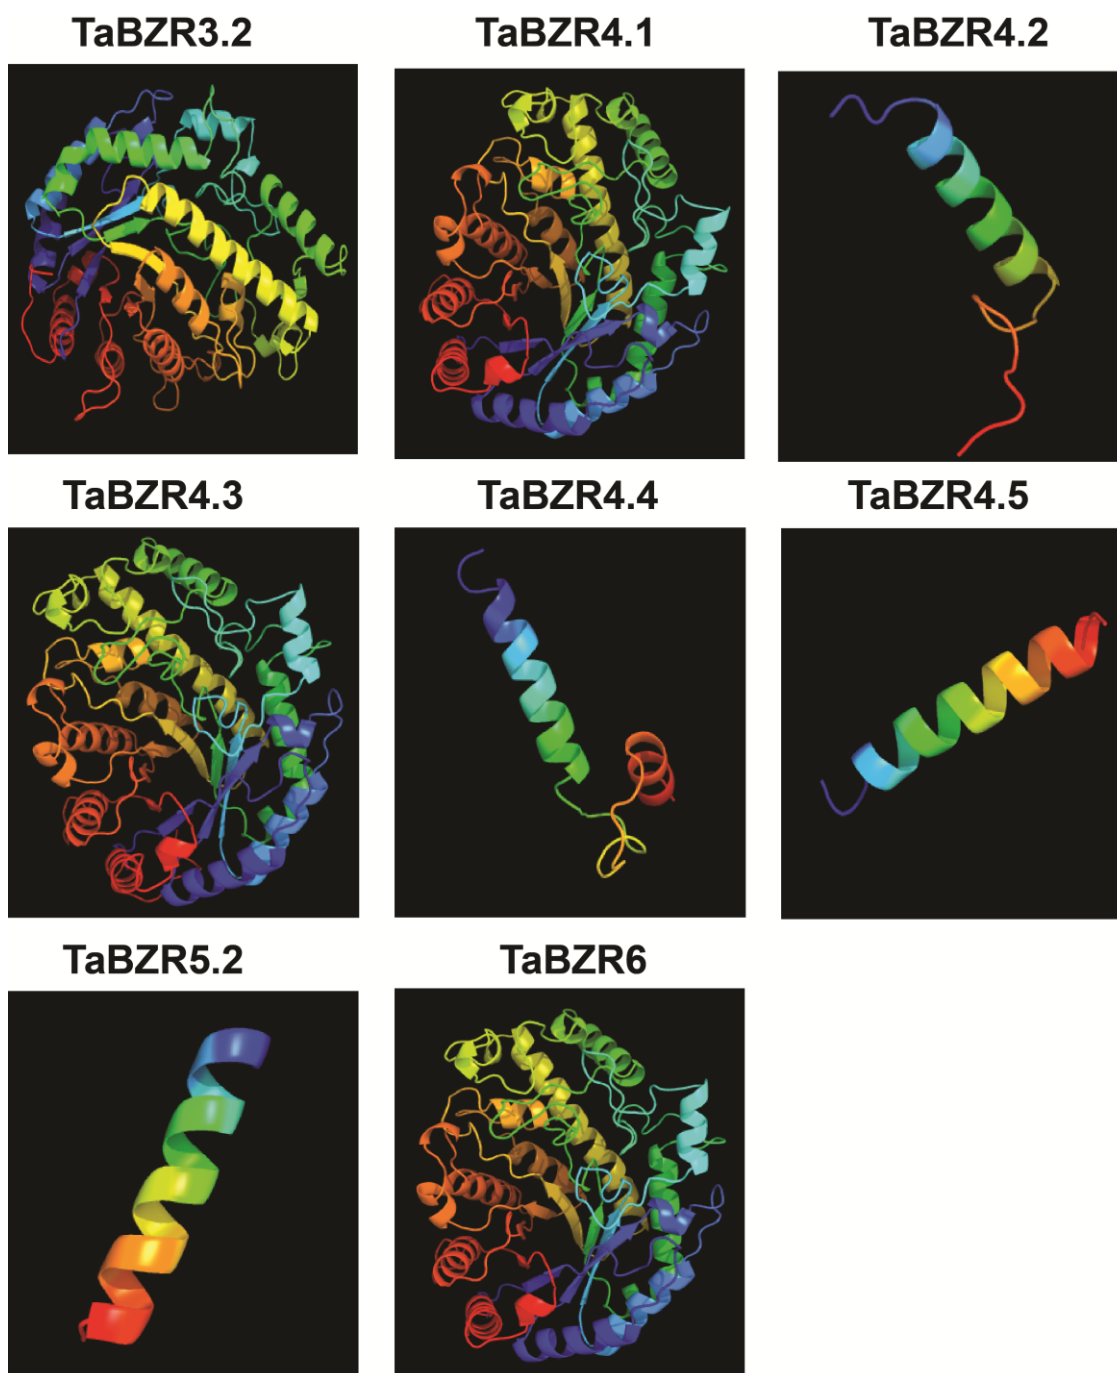

**Figure S6. Alignment and 3-dimensional structure of the TaBZR protein sequences.** **A.** The conserved BES\_N1/DUF822 domain is boxed with red color. Red lines indicate serine-rich phosphorylation sites and the C-terminal domain. Colored and shaded amino acids are chemically similar residues. Dashes indicate gaps introduced to maximize the alignment of the homologous region. **B.** Predicted 3D structures TaBZR proteins.



A

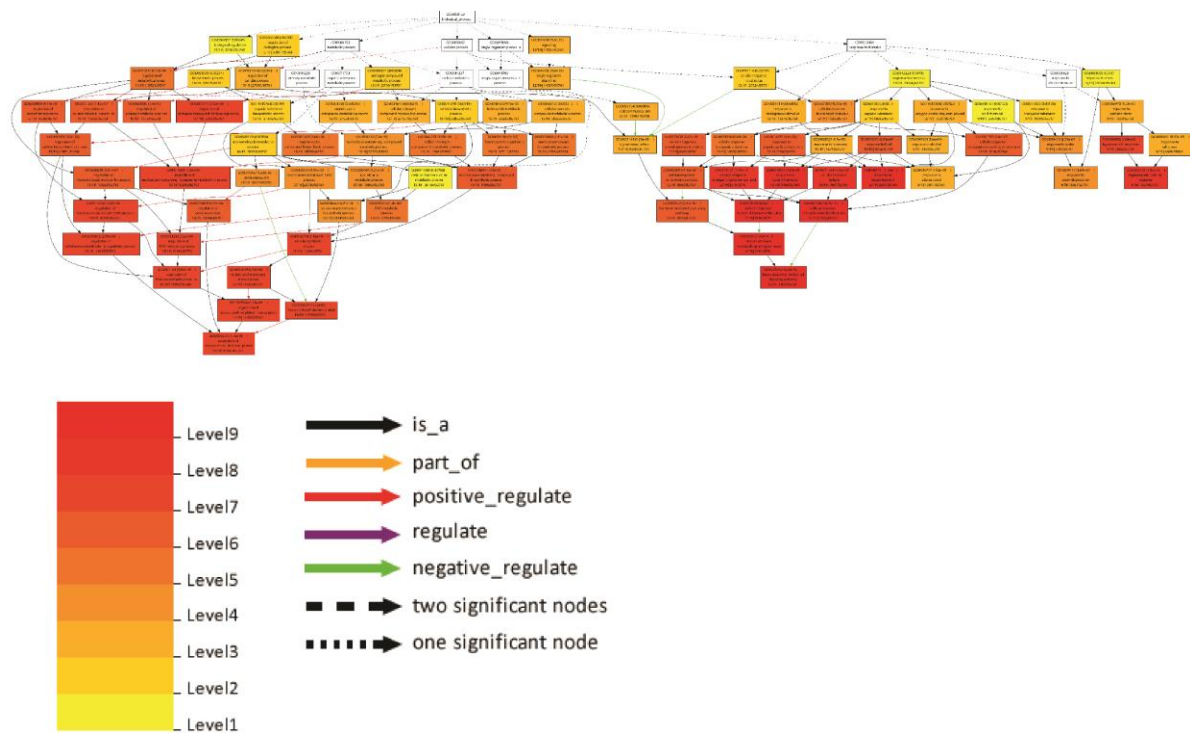

**B**

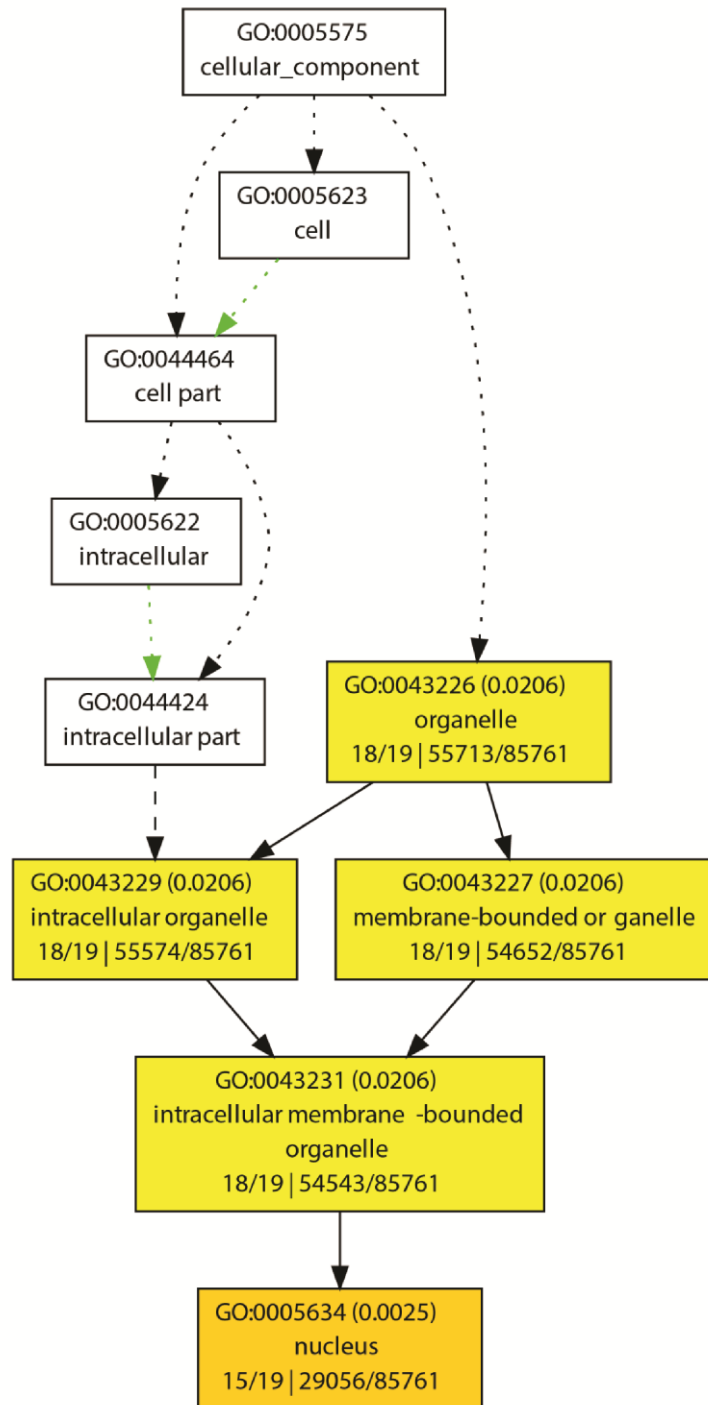

C

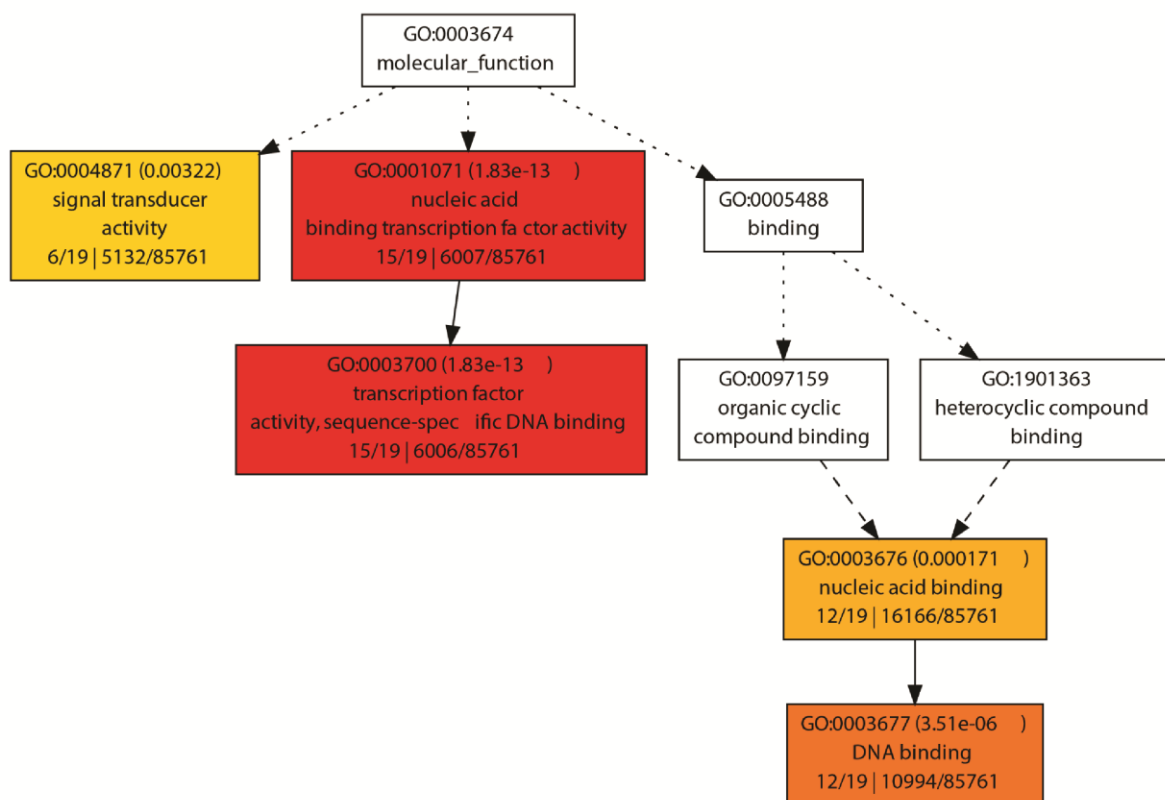

**Figure S7. Gene ontology term distribution *TaBZR* gene family predicted using AgriGO** A. Biological Process. B. Cellular component. C. Molecular function.

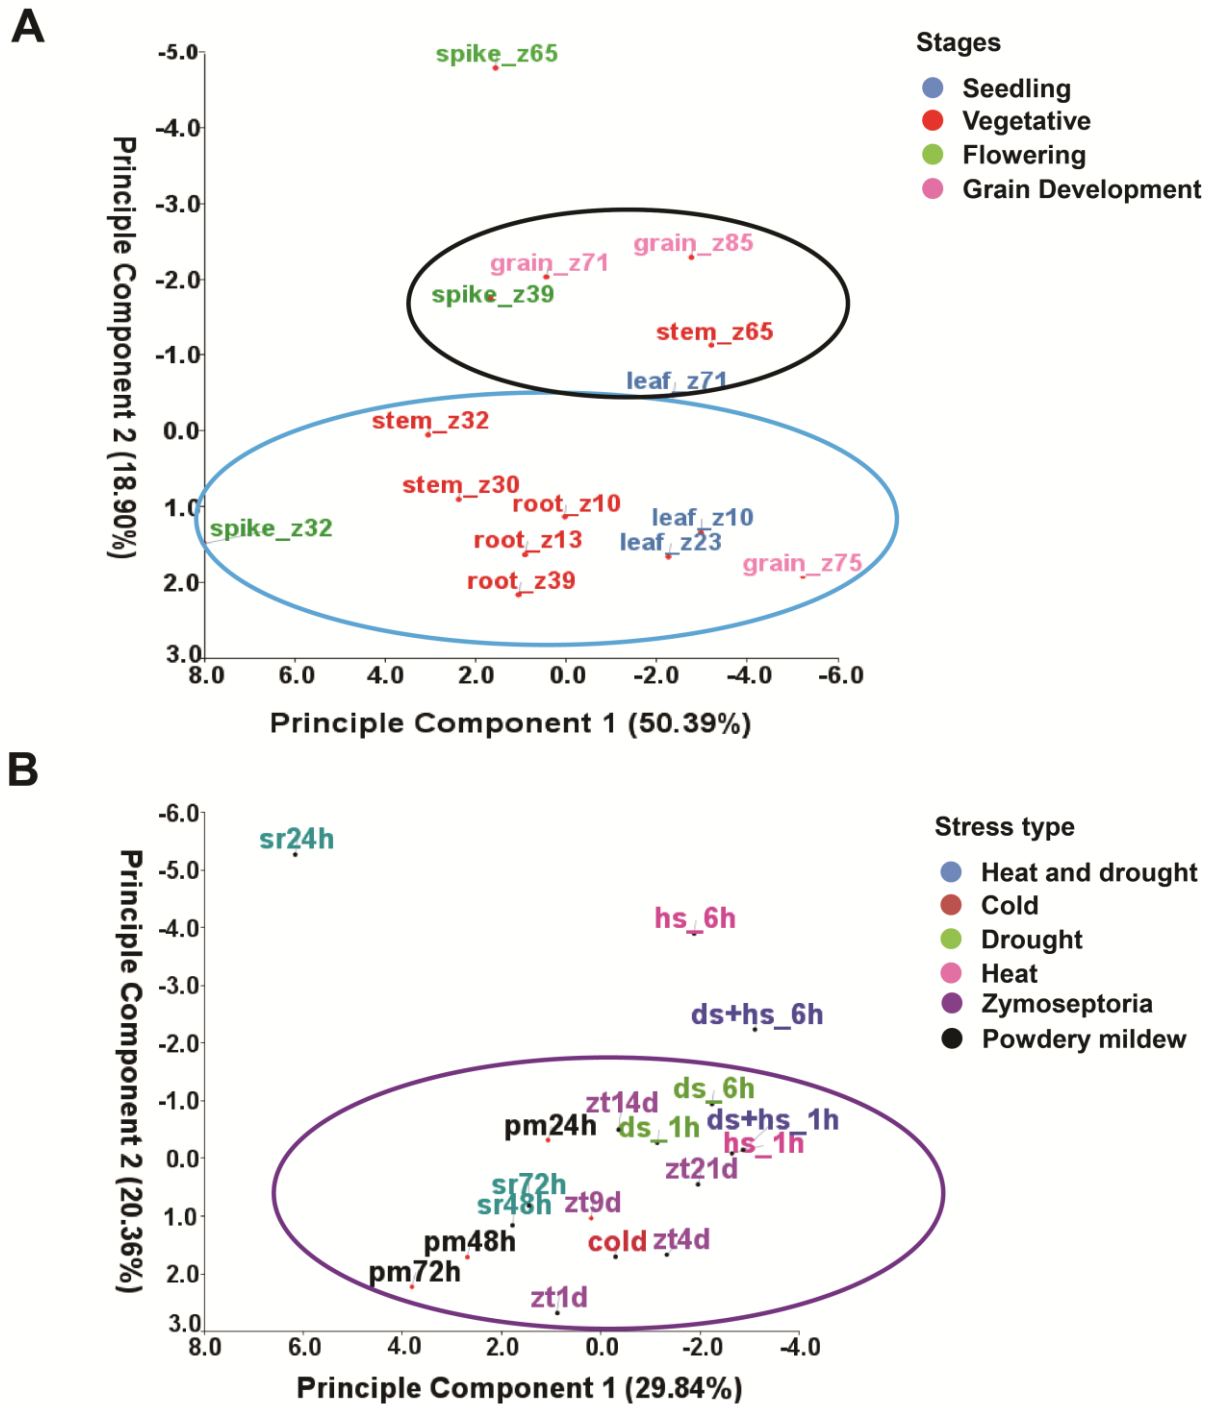

**Figure S8. PCA plots displaying grouping of different A. Developmental stages B. Biotic and abiotic stress conditions based on the *TaBZR* expression pattern. DS: Drought stress, HS: Heat stress, Zt: *Zymoseptoria tritici*, PM: Powdery mildew; SR: Stripe rust, h: hour and d: days.**
