# Supplementary material for: Genome-Wide Identification and Characterization of the Brassinazole-resistant (BZR) Gene Family and Its Expression in the Various Developmental Stage and Stress Conditions in Wheat (Triticum aestivum L.)
Source: Int J Mol Sci. 2021 Aug 14;22(16):8743. doi: 10.3390/ijms22168743 (PMC8395832; doi:10.3390/ijms22168743)
Supplement: Supplementary file 1 [file ijms-22-08743-s001.zip]

Archive with 11 entries (11 files):
- Table S1.xls
- Table S10.xls
- Table S2.xls
- Table S3.xls
- Table S4.xls
- Table S5.xls
- Table S6.xls
- Table S7.xls
- Table S8.xls
- Table S9.xls
- TaBZR supplmentary figures.pdf
