# Supplementary material for: Genome-Wide Identification and Characterization of the Brassinazole-resistant (BZR) Gene Family and Its Expression in the Various Developmental Stage and Stress Conditions in Wheat (Triticum aestivum L.)
Source: Int J Mol Sci. 2021 Aug 14;22(16):8743. doi: 10.3390/ijms22168743 (PMC8395832; doi:10.3390/ijms22168743)
Supplement: Supplementary file 1 [file ijms-22-08743-s001.zip › Table S1.xls]

## Sheet: Sheet1
Table S1. TaBZR genomic, CDS protein and promoter sequence.
Gene ID	Gene Name	Genomic sequence
TraesCS2A02G187800	TaBZR1.1	GCCCGGCCCGGCCCGGACACCACCAGTAGAATCTGGCCAATCCAGTCGCGATAAAGCGGACGGGGGTCGCCGTACCCTCCCCGTGAGCCCGCCCAGACGACCCCACACGACAGAGAAAGCTCAGCTCAGCACACTCCACGCCCAGCACCCTCTCCCAGTCCCATACTGTAGCACCCCACCTCACCATTAAAGAAACGAGCTAGGCCAAGTGGAGAGAGAGGAGAGGGGACGGAGAGAGAGCAGCGGAGCAGAGCAGAGCAGCGCCGGAGCAGGGGAGCTAGCATGACGTCGGGGGCGGCCCGGGCGGCGGCGGCGGCGGAGGCGGAGGCCGGGCTGGGGCGGACGCCCACGTGGAAGGAGCGGGAGAACAACAAGCGCCGCGAGCGCCGGCGCCGGGCC…
TraesCS2B02G219300	TaBZR1.2	TGAGCCAGCCCAGACGACCCCACACGAGACTACGAGAGAGAGAGAGCGCTCAGCTCAGCAAAACTCATCACACACCACGCCACTCCACGCCGCAGCTAGCCCAGCTCGCCTCCCGTCCCATACTGTAGCACCCCACCTCACCATTAAAGAAACGAGCTAGGCCAAGTGGAGAGAGAAGAGAGGGGACGGAGAGAGAGAGCAGCGGAGCAGAGCAGAGCAGCGAGGAGCAGGGGAGCTAGTAGGCTAGCATGACGTCCGGGGCGGCCCGGGCTGCGGCGGCGGCGGAGGCGGACGCCGGGCTGGGGCGGACGCCCACCTGGAAGGAGCGGGAGAACAACAAGCGGCGCGAGCGCCGGCGCCGGGCCATCGCCGCCAAGATCTTCACCGGCCTCCGCGCGC…
TraesCS2D02G199900	TaBZR1.3	AGCTAGGCCAAGTGGAGAGAGAAGAGAGGGGACGGGGAGTGAGAGAGAGCAGCAGCGGAGCGGAGCAGAGCAGCGAGGAGCAGGGGAGCTAGCATGACGTCGGGGGCGGCCCGGGCGGCGGCGGCGGCGGAGGCGGACGCCGGGCTGGGCCGGACGCCCACGTGGAAGGAGCGGGAGAACAACAAGCGGCGCGAGCGCCGGCGCCGGGCCATCGCCGCCAAGATCTTCACCGGCCTCCGCGCGCTCGGCAACTACAAGCTCCCCAAGCACTGCGACAACAACGAGGTGCTCAAGGAGCTCTGCCGCGAGGCCGGATGGGTCGTGGAGGACGACGGCACCACCTACCGCAAGGTGAGAGCGAGCTAGACCTCGTTTCTTGGTCTCGGGATCGAGATCGGC…
TraesCS3A02G123500	TaBZR2.1	ATGGAAGGAGTGGCCAAGTCGGTGGTGGCGCCAATGGAGGTGGCCGCTGGAGCTGTGGGGGAGGAGGCCATGGCGGTGGCGGTGGCGGCGGGGAGGAGGGGCTGCATCCGGTCGACGCGGGGCCCGTGGACGGTGCGGCGGCAGGCGCGGGGCGGCGCGGTGAAGACGTCGCTCCGGCACCCGACGCCGCGGGAGCGGGAGAACAACCGGCAGCGGGAGCGGCGCCGGCGGCAGGTGGCCACCAGGATCTACGCCAGCCTGCGCGCCAATGCCGGGTACGCGCTGCCCAAGCACGCCGACCAGAACGACGTGCTCCGGGCGCTCTGCGCCGAGGCGGGCTACCTCGTCGACGACGAAGGCAACGTCACGCGGTGCCACGAGGTATCGACAGACTTGTAA…
TraesCS3A02G139000	TaBZR2.2	CGGCCGCGTCGCGAGCCGGGGCTTTTCAAAGCTCACGCCACTGCTCCCCCACCCACCCTCTCCCCCTCTCTGTCCCTCTCCCTCTCTCTCTCTCCTTCCGTGTGATCTGCTCTCGCTCCTTCGCCCACTCGAGAGGGCGACCTCTTCCTTCGAGCTCGGCAAGGCCCCTTTCCTCGAGCTCAGCCGGCAGCGGAGTCGAGCTGCGTGGTGCGGAGGGCATGGCGACGGGGGGAGGCGGAGGAGGAGGAGCGGCGGACTTCGGGGCGGCGGGGGGAGCGGGCGGCAGGATGCCGACGTGGAGGGAGAGGGAGAACAACAAGCGGAGGGAGCGGCGGCGGCGCGCGATCGCCGCCAAGATATTCTCCGGCCTGCGGGCGCACGGCGGGTACAAGCTGCCCA…
TraesCS3B02G142600	TaBZR2.3	ACGAGGCAATGGAAGGAGTGGCCAAGTCCATCATGGCGCCAATGGAGGTGGCCGGAGCCGGGAGGGAGGAGGCCGAGGCCGCGATGGAGGTGGCGGGGAGGAGGGGCTGCATCCGGTCGACGCGGGGCCCGTGGACGGTGCGGCGGCAGGCGCGGGGCGGGGCGGTGAAGACGTCGCTTCGGCACCCGACGCCGCGGGAGCGGGAGAACAACCGGCAGCGGGAGCGGCGGCGGCGGCAGGTGGCCACCAGGATCTACGCCGGCCTGCGCGCCAACGCCGGGTACGCGCTGCCCAAGCACGCCGACCAGAACGACGTGCTCCGGGCGCTCTGCGCCGAGGCGGGCTACGTCGTCGACGACGAAGGCAACGTCACGCGCTGCCCCGAGGTATCGACAGACT…
TraesCS3B02G156600	TaBZR2.4	GGCCGCGTCGCGAGCCGGGGCTTTTCAAAGCTCACGCCACTGCTCCCCCACCCACCCTCTCTGTCTCTCTCTCTCTCTCTTCTTCCGTGTGATCTGCTCTCGCTCCTTCGCCCACTCGAGAGGGCGACCTCTTCTGCTTCCCTCCTTCCTGACTTCGAGCTCGGCAGGGGAGCCGAGCTGTGCGTGCTGCGGAGGGTTGACCGGGCATGGCGACGGGGGGAGGAGGAGGAGGGGCGGACTTCGGGGCGGCGGGGGGAGCGGGCGGCAGGATGCCGACGTGGAGGGAGAGGGAGAACAACAAGCGGAGGGAGCGGCGGCGGCGGGCGATCGCCGCCAAGATATTCTCCGGCCTGCGGGCGCACGGCGGGTACAAGCTGCCCAAGCACTGCGACAACAACG…
TraesCS3D02G125100	TaBZR2.5	ATCAGTACACAATGTGGAGTGGGAGCTAGAAGGATCGAGCTAAGTAGCCAACAGGAGCCAATGGAAGGAGTGGCGAAGTCGATCATGGCGCCAATGGAGGTGGCTGGAGCAGGGGAAGAGGAGGCCATGGCGGTGGCGGCGGGGAGGAGGGGCTGCATCCGGTCGACGCGGGGCCCGTGGACGGTGCGGCGGCAGGCGCGGGGCGGCGCGGTGAAGACGTCGCTCCGGCACCCGACGCCGCGGGAGCGGGAGAACAACCGGCAGCGGGAGCGGCGCCGGCGGCAGGTGGCCACCAGGATCTACGCTGGCCTGCGCGCCAACGCCGGGTACGCGCTGCCCAAGCACGCCGACCAGAACGACGTGCTCCGGGCGCTCTGCGCCGAGGCGGGCTACCTCGTC…
TraesCS3D02G139300	TaBZR2.6	GCCGCGTCGCGAGCCGGGGCTTTTCAAAGCTCACGCCACTGCTCCCCCACCCACCCTCTCTGTCTCTCTCTCTCTCCTCTTCCGTGTGATCTGCTCTCGCTCCTTCGCCCACTCGAGAGGGCGACCTCTTCTCCCTCCTTCCTTCCTTCGAGCTCGGCAGGGACCCTTCCTTCGAGCTCGGCAGCGGAGCCGAGCTGTGCGTGCCGCGGAGGGTTGACCGGGCATGGCGACGGGGGGAGGAGGAGGAGGAGGAGGAGGAGGGGCGGACTTCGGGGCGGCGGGGGGAGCGGGCGGCAGGATGCCGACGTGGAGGGAGAGGGAGAACAACAAGCGCAGGGAGCGGCGGCGGCGCGCGATCGCCGCCAAGATATTCTCCGGCCTGCGGGCGCACGGCGGGTA…
TraesCS4B02G009900	TaBZR3.1	ATGCTGCGGCTGGATCCGGGGGAGTACGACGAGGAGACGATGGGCGGGGCCGTCAAGGAGGAGGATGACTCCGACGAGGAAGGAGAGGAGGACGACTTCTTGGTGGCCGGCGACGAGCCGCGGCCTCCGGAGCAGCAGGGGCGGCGGCGGGGCCGGGGGAGGGAGGAGAAGGAGCGGACCAAGGCGCGGGAGCGGCGCCGGCGGGCGGTGACGGGGCGGATCCTGGCGGGGCTGCGCCGGCACGGCGGCTTCGGCCTCCGCTCCCGCGCCGACGTCAACGAGGTCGTCGCCGCGCTCGCCCGCCACGCCGGCTGGGTCGTCCTCCCCGACGGCACCACCTTCCCCTCCTCCTCCCACCCCCAGGCAAGTTCCCATTTTTCTTCTCCTGGTCACCACTCT…
TraesCS4D02G006100	TaBZR3.2	ATGCTGCGGCTGGATCCGATGGGCGGGGCCGTCAAGGAGGAGGATGGGGAGGGGGAGGACTCGGATGAGGAGGAGGAGGAGGACTTCTTGGTCGCCGACGCGGCGGCCGGCGACGAGCAGCACGCGCGGCCTCCGGAGCGGCGGCGGGGGAGGGGGAGGGAGGAGAAGGAGCGGACCAAGGCGCGGGAGCGGCGGCGGCGGGCGGTGACGGGGCGGATCCTGGCGGGGCTGCGGCGGCACGGCGGCTTCGGGCTCCGCTCCCGCGCCGACGTCAACGAGGTGGTCGCCGCCCTCGCCCGCCACGCCGGCTGGGTCGTCCTCCCCGACGGCACCACCTTCCCCTCCCACCCCCAGGCAAGTTTCCATTTTTCCCCTCCCTCCCCTCGCCTGGTCACCACT…
TraesCS6A02G085800	TaBZR4.1	AGCATTCCTTCCTCTGGCCTACACTCCAGAGTCTCCACTTCCTCGACCAGCGGCCGCGCCGGCAGCAGCTCGCGGTGCCCCTCCCTCCTACCCAGCGCTCGCAGATCGGCGCCGACGCCGCGGCCGCCGGGCGGAGCGCCATGGCCACGAAGCACCCCCACGGGGACGCTGATCCGTCCACTTCGCCTCCGCCGCCGCCGAGCCGCCGCCCGCGCGGCTTCGCCTCCGCCTCCACCCCCGCGGCGCCTCCTCCCCCGGGGCGGCGGCGCGGCGAGCGGGAGAGGGAGCGGGAGAAGGAGCGGACGAAGCTGCGGGAGCGGCAACGGCGCGCCATCACCAGCCGCATGCTGGCCGGGCTGCGGCAGCACGGCAACTTCCCCCTCCCCGCCCGCGCCGACA…
TraesCS6A02G338000	TaBZR4.2	CTCCTGCTCCGGACTCTTGACGGGAGGAGAGAGAGAGGGAGAAAGGAGAGGGGGATGGCGTCGAGGGTGCCGACGTGGAGGGAGCGGGAGAACAACCGGCGGCGCGAGCGGCGCCGGCGCGCGGTGGCCGCCAACATCTTCCACGGGCTGCGCGCCCGCGGCGGCTACGCGCTCCCCAAGCACTGCGACAACAACGAGGTGCTCAAGGCGCTCTGCGACGAGGCCGGCTGGACCGTCGAGCCCGACGGCACCACCTACCGCAAGGTCCGTCCCGTCCCTGTCCCTCCCTCCGTGCAAACTCATCCACCTTCTCCTTCCTCTCCTCTGCCGTCTCGACGCCGTTTTGCTTCATGCATGCGTTCGTGCGCGCGGCTGCACGCGCGTGCATGCGTACGTGCA…
TraesCS6B02G116400	TaBZR4.3	GCTCGCGGCGCCCCTCCCTCCTCCCCAGCGCTCGCAGATCGGCGCCGGCGCCGCGGACGCCGGGCGGAGCGCCATGGCCACGAAGCACCCCCACGGGGACGCCGATCCGTCCACCTCGCCTCCCCCGCCCCCGAGCCGCCGCCCGCGCGGCTTCGCCTCCGCCTCCAACCCTCCGGCGCCTCCTCCCCCGGGGCGGCGGCGCGGCGAGCGGGAGAGGGAGCGGGAGAAGGAGCGGACGAAGCTGCGGGAGCGGCAACGGCGCGCCATCACGAGCCGCATGCTGGCCGGGCTGCGGCAGCACGGCAACTTCCCCCTCCCCGCCCGCGCCGACATGAACGACGTCCTCGCCGCCCTCGCCCGCGCTGCCGGGTGGACCGTCCACCCCGACGGCACCACCTT…
TraesCS6B02G368700	TaBZR4.4	ATGGCGTCGAGGGTGCCGACGTGGAGGGAGCGGGAGAACAACCGGCGGCGCGAGCGGCGCCGGCGCGCGGTGGCCGCCAACATCTTCCACGGGCTGCGCGCCCGCGGCGGCTACGCGCTCCCCAAGCACTGCGACAACAACGAGGTGCTCAAGGCGCTCTGCGACGAGGCCGGCTGGACCGTCGAGCCCGACGGCACCACCTACCGCAAGGTCCGTCCCGTCCCTCCCTCCGTGCAAACTCATTCACCTTCTCCTTCCTCTCCTCTGTCTCGACGCCGTTTTGCTTCATGCATGCGTTCGTGCGCGCGGCTGTACGCACGTACGTACATCAATTCTTGCCGAGCTGTGGGACGATCTGATATTCCTTCTCATTTGGTTGAGCTCTTTCTTTTCTCGGTT…
TraesCS6D02G318800	TaBZR4.5	AGTCCACCACCCTGCGAGCTCCTGCTCTGGACTCTTGACGGGAAGAGAGAGAGGAGAGGGGGATGGCGTCGAGGGTGCCGACGTGGAGGGAGCGGGAGAACAACCGGCGGCGCGAGCGGCGCCGGCGCGCGGTGGCCGCCAACATCTTCCACGGGCTGCGCGCCCGCGGCGGCTACGCGCTCCCCAAGCACTGCGACAACAACGAGGTGCTCAAGGCGCTCTGCGACGAGGCCGGCTGGACCGTCGAGCCCGACGGCGCCACCTACCGCAAGGTCCGTCCCTCCCTCCCTCCCTGCAACTGCAAACTCCTTCTCCTTCCTCTCCTCCGTCTCGGTGCTGTTTTGCTTCATGCATGCGTTCGTGCGCGCCGCTGTACGCACGCACGTACGAACATTAATT…
TraesCS7A02G354800	TaBZR5.1	AGCTGCGTTCAGACTTCTCCTGCCACTTCCTCCTTCTTCCTCCCCACAAATACTAAACAAAGCAGCCCACAATCGAGCGAGAGATTGAGAGAGCTGCGGCCGCAAGAAACAGCGAGGCAGCAGCGCGGCGAGCCCTTGGCCCTTCCTCGCAGATCCAGCGGCGGCGGGTGCTCCCAGCGGGCGCGCCGATGATGCACGGCCCCGCGGGAGGGAGCGGCGGCGGCGGCGGGCACGGGCTGGGCGGCACGAGGGTGCCCACGTGGAGGGAGCGGGAGAACAACCGGCGGAGGGAGCGGCGGCGCCGGGCGATCGCCGCCAAGATCTACACCGGCCTCAGGGCCTACGGCAACTACAACCTCCCCAAGCACTGCGACAACAATGAGGTCCTCAAGGCGCTCT…
TraesCS7B02G272900	TaBZR5.2	GAGCTGAGCCGAGCGTTTAAGCCAGACAGACAGCGGCATGAGGCAGCAGCTGCGTTCAGACTGCCAATTCCTCCTTCCTCCTCCGTCTTCCTCCCCACAAATACTAAACAAACCAGCCAGCAATCGAGCGAGAGATTGAGAGAGAGCTGCGGCCGCAAGAAACAGCGAAGCAGCGCGGCGAACCCCGGGCCAGACCTCGCAGATCCAGCGGCGGCGGCGGGCGCGCCGATGATGCACGGCCCCGCGGGAGGGAGCGGCGGCGGCGGCGGCCACGGGCTGGGCGGCACGAGGGTGCCCACGTGGAGGGAGCGCGAGAACAACCGGCGGAGGGAGCGGCGGCGCCGGGCGATCGCCGCCAAGATCTACACCGGCCTCAGGGCCTACGGCAACTACAACCTC…
TraesCS7D02G368000	TaBZR5.3	GAGGCCGAGCGTTTAAGCCAGCCAGACAGCAGCATGAGGCAGCAGCTGCGTTCAGACTGCCAATTCCTCCGTCCTCCTTCTTCCTCCCCACAAATACTAAACAATCGAGCGAGAGATTGAGAGAGCTGCGGCCGCAAGAAACAGAGAAGCAGCACGGCGAACCCCGAGCCCGACCTCGCAGATCCAGCGGCGGCGGCGGGCGGGCCGATGATGCACGGCCCCGCGGGAGGGAGCGGCGGCGGCGGCGGCCACGGGCTGGGCGGCACGAGGGTGCCCACGTGGAGGGAGCGGGAGAACAACCGGCGGAGGGAGCGGCGGCGCCGGGCGATCGCCGCCAAGATCTACACCGGCCTCAGGGCCTACGGCAACTACAACCTTCCCAAGCACTGCGACAACAAT…
TraesCSU02G078100	TaBZR6	GCCGCGCCGGCAGCAGCTCGCGGTGCCCCTCCCTCCTCCCCAGCGCTCGCAGATCGGCGCCGGCGCCGCGGCCGCCGGGCGGAGGGCCATGGCCACGAAGCACCCACACGGGGACGCTGATCCGTCCACCTCGCCTCCCCCGCCGCCGAGCCGCCGCCCGCGCGGCTTCGCCTCCGCCTCTACCCCCGCGGCGCCTCCTCCCCCGGGGCGGCGGCGCGGCGAGCGGGAGAGGGAGCGGGAGAAGGAGCGGACGAAGCTGCGGGAGCGGCAGCGGCGCGCCATCACCAGCCGTATGCTGGCCGGGCTGCGGCAGCACGGCAACTTCCCCCTCCCCGCCCGCGCCGACATGAACGACGTCCTCGCCGCCCTCGCCCGCGCCGCCGGGTGGACCGTCCACCC…
Gene ID	Gene Name	CDS sequence
TraesCS2A02G187800	TaBZR1.1	ATGACGTCGGGGGCGGCCCGGGCGGCGGCGGCGGCGGAGGCGGAGGCCGGGCTGGGGCGGACGCCCACGTGGAAGGAGCGGGAGAACAACAAGCGCCGCGAGCGCCGGCGCCGGGCCATCGCCGCCAAGATCTTCACCGGCCTCCGCGCGCTCGGCAACTACAAGCTGCCCAAGCACTGCGACAACAACGAGGTGCTCAAGGAGCTCTGCCGCGAGGCCGGCTGGGTCGTGGAGGACGACGGCACCACCTACCGCAAGGGATACAAGCCGCCGTCGTCCGGGCCGTTCGGTGGGGTCTCGTCGGCGGGCATGAGCCCCTGCTCGTCCTCGCAGCTGCTCAGCGCGCCCTCGTCGTCGTTCCCGAGCCCGGTGCCTTCCTACCACGCCAGCCCGGCGTCG…
TraesCS2B02G219300	TaBZR1.2	ATGACGTCCGGGGCGGCCCGGGCTGCGGCGGCGGCGGAGGCGGACGCCGGGCTGGGGCGGACGCCCACCTGGAAGGAGCGGGAGAACAACAAGCGGCGCGAGCGCCGGCGCCGGGCCATCGCCGCCAAGATCTTCACCGGCCTCCGCGCGCTCGGCAACTACAAGCTCCCCAAGCACTGCGACAACAACGAGGTGCTCAAGGAGCTCTGCCGCGAGGCCGGATGGGTCGTGGAGGACGACGGCACCACCTACCGCAAGGGATACAAGCCGCCGTCGTCCGGGCCGTTCGGTGGGGTCTCGTCGGCGGGCATGAGCCCCTGCTCGTCCTCGCAGCTGCTCAGTGCGCCGTCGTCGTCGTTCCCGAGCCCGGTGCCTTCCTACAACGCCAGCCCGGCGTCG…
TraesCS2D02G199900	TaBZR1.3	ATGACGTCGGGGGCGGCCCGGGCGGCGGCGGCGGCGGAGGCGGACGCCGGGCTGGGCCGGACGCCCACGTGGAAGGAGCGGGAGAACAACAAGCGGCGCGAGCGCCGGCGCCGGGCCATCGCCGCCAAGATCTTCACCGGCCTCCGCGCGCTCGGCAACTACAAGCTCCCCAAGCACTGCGACAACAACGAGGTGCTCAAGGAGCTCTGCCGCGAGGCCGGATGGGTCGTGGAGGACGACGGCACCACCTACCGCAAGGGATACAAGCCGCCGTCGTCCGGGCCGTTCGGTGGGGTCTCGTCGGCGGGCATGAGCCCCTGCTCGTCCTCGCAGCTGCTCAGTGCGCCCTCGTCGTCGTTCCCGAGCCCGGTGCCTTCCTACCACGCCAGCCCGGCGTCG…
TraesCS3A02G123500	TaBZR2.1	ATGGAAGGAGTGGCCAAGTCGGTGGTGGCGCCAATGGAGGTGGCCGCTGGAGCTGTGGGGGAGGAGGCCATGGCGGTGGCGGTGGCGGCGGGGAGGAGGGGCTGCATCCGGTCGACGCGGGGCCCGTGGACGGTGCGGCGGCAGGCGCGGGGCGGCGCGGTGAAGACGTCGCTCCGGCACCCGACGCCGCGGGAGCGGGAGAACAACCGGCAGCGGGAGCGGCGCCGGCGGCAGGTGGCCACCAGGATCTACGCCAGCCTGCGCGCCAATGCCGGGTACGCGCTGCCCAAGCACGCCGACCAGAACGACGTGCTCCGGGCGCTCTGCGCCGAGGCGGGCTACCTCGTCGACGACGAAGGCAACGTCACGCGGTGCCACGAGGTATCGACAGACTTCGGC…
TraesCS3A02G139000	TaBZR2.2	ATGGCGACGGGGGGAGGCGGAGGAGGAGGAGCGGCGGACTTCGGGGCGGCGGGGGGAGCGGGCGGCAGGATGCCGACGTGGAGGGAGAGGGAGAACAACAAGCGGAGGGAGCGGCGGCGGCGCGCGATCGCCGCCAAGATATTCTCCGGCCTGCGGGCGCACGGCGGGTACAAGCTGCCCAAACACTGCGACAACAACGAGGTCCTCAAGGCCCTCTGCAACGAGGCCGGCTGGGTCGTCGAGCCCGACGGCACCACCTACCGCAAGGGATGCAGACCTGCAGAACGCATGGATGGGATTGGGTGCTCCGTGTCACCAAGCCCATGTTCCTCATATCAGCCAAGTCCGCGGGCATCATACAATGCGAGCCCTACCTCCTCTTCATTCCCCAGCGGCGCG…
TraesCS3B02G142600	TaBZR2.3	ATGGAAGGAGTGGCCAAGTCCATCATGGCGCCAATGGAGGTGGCCGGAGCCGGGAGGGAGGAGGCCGAGGCCGCGATGGAGGTGGCGGGGAGGAGGGGCTGCATCCGGTCGACGCGGGGCCCGTGGACGGTGCGGCGGCAGGCGCGGGGCGGGGCGGTGAAGACGTCGCTTCGGCACCCGACGCCGCGGGAGCGGGAGAACAACCGGCAGCGGGAGCGGCGGCGGCGGCAGGTGGCCACCAGGATCTACGCCGGCCTGCGCGCCAACGCCGGGTACGCGCTGCCCAAGCACGCCGACCAGAACGACGTGCTCCGGGCGCTCTGCGCCGAGGCGGGCTACGTCGTCGACGACGAAGGCAACGTCACGCGCTGCCCCGAGCGTTCCCCGGGCGTCGGCGCA…
TraesCS3B02G156600	TaBZR2.4	ATGGCGACGGGGGGAGGAGGAGGAGGGGCGGACTTCGGGGCGGCGGGGGGAGCGGGCGGCAGGATGCCGACGTGGAGGGAGAGGGAGAACAACAAGCGGAGGGAGCGGCGGCGGCGGGCGATCGCCGCCAAGATATTCTCCGGCCTGCGGGCGCACGGCGGGTACAAGCTGCCCAAGCACTGCGACAACAACGAGGTCCTCAAGGCCCTCTGCAACGAGGCCGGCTGGGTCGTCGAGCCCGACGGCACCACCTACCGCAAGGGATGCAGACCTGCAGAACGCATGGATGGGATTGGGTGCTCCGTGTCACCAAGTCCATGCTCTTCATATCAGCCGAGTCCGCGGGCATCATACAATGCGAGCCCTACTTCCTCTTCATTCCCCAGCGGCGCATCGTCG…
TraesCS3D02G125100	TaBZR2.5	ATGGAAGGAGTGGCGAAGTCGATCATGGCGCCAATGGAGGTGGCTGGAGCAGGGGAAGAGGAGGCCATGGCGGTGGCGGCGGGGAGGAGGGGCTGCATCCGGTCGACGCGGGGCCCGTGGACGGTGCGGCGGCAGGCGCGGGGCGGCGCGGTGAAGACGTCGCTCCGGCACCCGACGCCGCGGGAGCGGGAGAACAACCGGCAGCGGGAGCGGCGCCGGCGGCAGGTGGCCACCAGGATCTACGCTGGCCTGCGCGCCAACGCCGGGTACGCGCTGCCCAAGCACGCCGACCAGAACGACGTGCTCCGGGCGCTCTGCGCCGAGGCGGGCTACCTCGTCGACGACGAAGGCAACGTCACGCGGTGCCACGAGCGTTCTTCAGGCGCCGGCACCGGCGGC…
TraesCS3D02G139300	TaBZR2.6	ATGGCGACGGGGGGAGGAGGAGGAGGAGGAGGAGGAGGGGCGGACTTCGGGGCGGCGGGGGGAGCGGGCGGCAGGATGCCGACGTGGAGGGAGAGGGAGAACAACAAGCGCAGGGAGCGGCGGCGGCGCGCGATCGCCGCCAAGATATTCTCCGGCCTGCGGGCGCACGGCGGGTACAAGCTGCCCAAGCACTGCGACAACAACGAGGTCCTCAAGGCCCTCTGCAACGAGGCCGGCTGGGTCGTCGAGCCCGACGGCACCACCTACCGCAAGGGATGCAGACCCGCAGAGCGCATGGATGGGATTGGGTGCTCAGTGTCACCAAGCCCATGCTCCTCCTATCAGCCGAGTCCGCGGGCATCATACAATGCAAGCCCTACTTCCTCTTCATTCCCCAGC…
TraesCS4B02G009900	TaBZR3.1	ATGCTGCGGCTGGATCCGGGGGAGTACGACGAGGAGACGATGGGCGGGGCCGTCAAGGAGGAGGATGACTCCGACGAGGAAGGAGAGGAGGACGACTTCTTGGTGGCCGGCGACGAGCCGCGGCCTCCGGAGCAGCAGGGGCGGCGGCGGGGCCGGGGGAGGGAGGAGAAGGAGCGGACCAAGGCGCGGGAGCGGCGCCGGCGGGCGGTGACGGGGCGGATCCTGGCGGGGCTGCGCCGGCACGGCGGCTTCGGCCTCCGCTCCCGCGCCGACGTCAACGAGGTCGTCGCCGCGCTCGCCCGCCACGCCGGCTGGGTCGTCCTCCCCGACGGCACCACCTTCCCCTCCTCCTCCCACCCCCAGCTCGGGGTGGTGAGCGTGAAGGGCGAGGTGGCGGAG…
TraesCS4D02G006100	TaBZR3.2	ATGCTGCGGCTGGATCCGATGGGCGGGGCCGTCAAGGAGGAGGATGGGGAGGGGGAGGACTCGGATGAGGAGGAGGAGGAGGACTTCTTGGTCGCCGACGCGGCGGCCGGCGACGAGCAGCACGCGCGGCCTCCGGAGCGGCGGCGGGGGAGGGGGAGGGAGGAGAAGGAGCGGACCAAGGCGCGGGAGCGGCGGCGGCGGGCGGTGACGGGGCGGATCCTGGCGGGGCTGCGGCGGCACGGCGGCTTCGGGCTCCGCTCCCGCGCCGACGTCAACGAGGTGGTCGCCGCCCTCGCCCGCCACGCCGGCTGGGTCGTCCTCCCCGACGGCACCACCTTCCCCTCCCACCCCCAGACGCCGCGCCCCGCGATGCTCGCACCGGCCATCTCCCTCTCCTCC…
TraesCS6A02G085800	TaBZR4.1	ATGCTGGCCGGGCTGCGGCAGCACGGCAACTTCCCCCTCCCCGCCCGCGCCGACATGAACGACGTTCTCGCCGCGCTCGCCCGCGCCGCCGGGTGGACCGTCCACCCCGACGGCACCACCTTCCTCTCCTCTCCCCAGCCCTCTCTCCCTCCCCCTGCCCAATTCGGTGCTTTCCAGGCTACTTCTCTGGAAACCCCAGTTTTTACCAACTCTCTGAACAGCTACGCCATTGGGACGCCAATAGATTCCCAGGCTTCAGCCCTACAAACAGATGATAGCCTGTCACCGTCGTCATTGGATTCAGTGGTGGTGGCAGAGCAAAGCATAAAGAATGAGAGCTATGGGAATTCAAGTTCAGCCAATTCTTTGAATTGTATGGGAAGTGATCAGCTGTTGAGA…
TraesCS6A02G338000	TaBZR4.2	ATGGCGTCGAGGGTGCCGACGTGGAGGGAGCGGGAGAACAACCGGCGGCGCGAGCGGCGCCGGCGCGCGGTGGCCGCCAACATCTTCCACGGGCTGCGCGCCCGCGGCGGCTACGCGCTCCCCAAGCACTGCGACAACAACGAGGTGCTCAAGGCGCTCTGCGACGAGGCCGGCTGGACCGTCGAGCCCGACGGCACCACCTACCGCAAGGGTTCCAAGCCTGTAACAGCAGAAGGTACCAACCCGATGGTCCGGTCGGGCTCCCCAAGCCCGTGCTCGTCGCACCAGGTGAGCCCGCGGGCCTCCTTCCCGACCTCCGGCACGTCCTCGCATACCACGCTCGGCGGCGGCCGCGGCAGCTGCTACGAGGGCGGTTCCCTCATCCCTTGGCTCAAGAAC…
TraesCS6B02G116400	TaBZR4.3	ATGGCCACGAAGCACCCCCACGGGGACGCCGATCCGTCCACCTCGCCTCCCCCGCCCCCGAGCCGCCGCCCGCGCGGCTTCGCCTCCGCCTCCAACCCTCCGGCGCCTCCTCCCCCGGGGCGGCGGCGCGGCGAGCGGGAGAGGGAGCGGGAGAAGGAGCGGACGAAGCTGCGGGAGCGGCAACGGCGCGCCATCACGAGCCGCATGCTGGCCGGGCTGCGGCAGCACGGCAACTTCCCCCTCCCCGCCCGCGCCGACATGAACGACGTCCTCGCCGCCCTCGCCCGCGCTGCCGGGTGGACCGTCCACCCCGACGGCACCACCTTCCTCTCCTCTCCCCAGCCCCCTCTCCCTCCCCCCGCCCAATTCGGTGCTTTCCAGGCTACTTCTCTGGAAACC…
TraesCS6B02G368700	TaBZR4.4	ATGGCGTCGAGGGTGCCGACGTGGAGGGAGCGGGAGAACAACCGGCGGCGCGAGCGGCGCCGGCGCGCGGTGGCCGCCAACATCTTCCACGGGCTGCGCGCCCGCGGCGGCTACGCGCTCCCCAAGCACTGCGACAACAACGAGGTGCTCAAGGCGCTCTGCGACGAGGCCGGCTGGACCGTCGAGCCCGACGGCACCACCTACCGCAAGGGTTGCAAGCCTCCAGCAGCAGCAGAAGGTGCCAACCCGGTGGTCCGGTCGGGCTCCCGAAGCCCGTGCTCGTCGCACCCGGTGAGCCCGCGGGCCCCGTACAACCCGAGGGCAGGGCCGTCCACCTTCCCGACCTCCGGCACGTCCTCGCATACCACGCTCGGCGGCGGCAGCAGCTACTATGAGGGC…
TraesCS6D02G318800	TaBZR4.5	ATGGCGTCGAGGGTGCCGACGTGGAGGGAGCGGGAGAACAACCGGCGGCGCGAGCGGCGCCGGCGCGCGGTGGCCGCCAACATCTTCCACGGGCTGCGCGCCCGCGGCGGCTACGCGCTCCCCAAGCACTGCGACAACAACGAGGTGCTCAAGGCGCTCTGCGACGAGGCCGGCTGGACCGTCGAGCCCGACGGCGCCACCTACCGCAAGGGTTCCAAGCCTCTAGCAGCAGAAGGTGCCAACCCGATGGTCCGGTCGGGCTCCCCAAGCCCGTGCTCGTCGCACCAGGTGAGCCCGCGGGCCTCCTTCCCGACCTCCGGCACCTCCTCGCATACCACCCTCGGCGGCGGCGGCGGCAGCGGCAGCTACTATGAGGGCAGCTCCTTCATCCCTTGGCTC…
TraesCS7A02G354800	TaBZR5.1	ATGATGCACGGCCCCGCGGGAGGGAGCGGCGGCGGCGGCGGGCACGGGCTGGGCGGCACGAGGGTGCCCACGTGGAGGGAGCGGGAGAACAACCGGCGGAGGGAGCGGCGGCGCCGGGCGATCGCCGCCAAGATCTACACCGGCCTCAGGGCCTACGGCAACTACAACCTCCCCAAGCACTGCGACAACAATGAGGTCCTCAAGGCGCTCTGCAACGAGGCCGGCTGGGTCGTCGAGCCCGACGGCACCACCTACCGCAGGGGATGCAAACCTCCTCCACAGGCGCGTCCTGATCCAATGAGGTCTGCTTCGGCAAGCCCCTGCTCTTCATACCAGCCGAGTCCACGGGCCTCGTACAACCCGAGCCCTGCGTCCTCCTCCTTCCCGAGCTCCGGATCC…
TraesCS7B02G272900	TaBZR5.2	ATGATGCACGGCCCCGCGGGAGGGAGCGGCGGCGGCGGCGGCCACGGGCTGGGCGGCACGAGGGTGCCCACGTGGAGGGAGCGCGAGAACAACCGGCGGAGGGAGCGGCGGCGCCGGGCGATCGCCGCCAAGATCTACACCGGCCTCAGGGCCTACGGCAACTACAACCTCCCCAAGCACTGCGACAACAATGAGGTCCTCAAGGCGCTCTGCAACGAGGCCGGCTGGGTCGTCGAGCCCGACGGCACCACCTACCGCAGGGGATGTAAGCCTCCTCCACAAGTGCGTCCTGATCCAATGAGGTCTGCTTCGGCAAGCCCCTGTTCTTCATATCAGCCGAGCCCACGGGCCTCATACAACCCGAGCCCTGCGTCCTCCTCCTTTCCGAGCTCTGGATCC…
TraesCS7D02G368000	TaBZR5.3	ATGATGCACGGCCCCGCGGGAGGGAGCGGCGGCGGCGGCGGCCACGGGCTGGGCGGCACGAGGGTGCCCACGTGGAGGGAGCGGGAGAACAACCGGCGGAGGGAGCGGCGGCGCCGGGCGATCGCCGCCAAGATCTACACCGGCCTCAGGGCCTACGGCAACTACAACCTTCCCAAGCACTGCGACAACAATGAGGTCCTCAAGGCGCTCTGCAACGAGGCCGGCTGGGTCGTCGAGCCCGACGGCACCACCTACCGCAGGGGATGCAAACCTCCTCCACAAGCGCGTACTGATCCAATGAGGTCTGCTTCGGCAAGCCCCTGCTCTTCATACCAGCCGAGCCCACGGGCCTCATACAACCCAAGCCCTGCGTCTTCCTCCTTCCCGAGCTCTGGATCC…
TraesCSU02G078100	TaBZR6	ATGGCCACGAAGCACCCACACGGGGACGCTGATCCGTCCACCTCGCCTCCCCCGCCGCCGAGCCGCCGCCCGCGCGGCTTCGCCTCCGCCTCTACCCCCGCGGCGCCTCCTCCCCCGGGGCGGCGGCGCGGCGAGCGGGAGAGGGAGCGGGAGAAGGAGCGGACGAAGCTGCGGGAGCGGCAGCGGCGCGCCATCACCAGCCGTATGCTGGCCGGGCTGCGGCAGCACGGCAACTTCCCCCTCCCCGCCCGCGCCGACATGAACGACGTCCTCGCCGCCCTCGCCCGCGCCGCCGGGTGGACCGTCCACCCCGACGGCACCACCTTCCTCTCCTCTCCCCCGCCCCCTCTCCCTTCCCCCGCCCAATTCGGGGCTTTCCAGGCTACTTCTCTGGAAACC…
Gene ID	Gene Name	Protein sequence
TraesCS2A02G187800	TaBZR1.1	MTSGAARAAAAAEAEAGLGRTPTWKERENNKRRERRRRAIAAKIFTGLRALGNYKLPKHCDNNEVLKELCREAGWVVEDDGTTYRKGYKPPSSGPFGGVSSAGMSPCSSSQLLSAPSSSFPSPVPSYHASPASSSFPSPTRLDNPSPACLLPFLRGLPNLPPLRVSNSAPVTPPLSSPTASRPPKILKPDWEVDPFRHPFFALSAPASPTRGRRHEHPDTIPECDESDVSTVDSGRWISFQMATTAPTSPAYNLVNLGASSSNSMEMEGMAGERGRSGPEFEFDKGRVTPWEGERIHEVAAEELELTLGVGSK
TraesCS2B02G219300	TaBZR1.2	MTSGAARAAAAAEADAGLGRTPTWKERENNKRRERRRRAIAAKIFTGLRALGNYKLPKHCDNNEVLKELCREAGWVVEDDGTTYRKGYKPPSSGPFGGVSSAGMSPCSSSQLLSAPSSSFPSPVPSYNASPASSSFPSPTRLDNPSPACLLPFLRGLPNLPPLRVSNSAPVTPPLSSPTASRPPKILKPDWEVDPFRHPFFALSAPASPTRGRRHEHPDTIPECDESDVSTVDSGRWISFQMATTAPTSPAYNLVNLGASSSNSMELDGMAGERGRSGPEFEFDKGRVTPWEGERIHEVAAEELELTLGVGSK
TraesCS2D02G199900	TaBZR1.3	MTSGAARAAAAAEADAGLGRTPTWKERENNKRRERRRRAIAAKIFTGLRALGNYKLPKHCDNNEVLKELCREAGWVVEDDGTTYRKGYKPPSSGPFGGVSSAGMSPCSSSQLLSAPSSSFPSPVPSYHASPASSSFPSPSRLDNSSPACLLPFLRGLPNLPPLRVSNSAPVTPPLSSPTASRPPKILKPDWEVDPFRHPFFALSAPASPTRGRRHEHPDTIPECDESDVSTVDSGRWISFQMATTAPTSPAYNLVNLGASSSNSMEMDGMAGERGRSGPEFEFDKGRVTPWEGERIHEVAAEELELTLGVGSK
TraesCS3A02G123500	TaBZR2.1	MEGVAKSVVAPMEVAAGAVGEEAMAVAVAAGRRGCIRSTRGPWTVRRQARGGAVKTSLRHPTPRERENNRQRERRRRQVATRIYASLRANAGYALPKHADQNDVLRALCAEAGYLVDDEGNVTRCHEVSTDFGASCSSGHLQPSSHSHSVATEATAGGIHQALLEPEAEPKHKISLELTLSFSYM
TraesCS3A02G139000	TaBZR2.2	MATGGGGGGGAADFGAAGGAGGRMPTWRERENNKRRERRRRAIAAKIFSGLRAHGGYKLPKHCDNNEVLKALCNEAGWVVEPDGTTYRKGCRPAERMDGIGCSVSPSPCSSYQPSPRASYNASPTSSSFPSGASSPFLPHSNNMVNGVDATPILPWLQTFSNSTASNKRPHLPPLLIHGGSISAPVTPPLSSPTARTPRMKTDWDESVIQPPWHGSNSPCVVNSTPPSPGRQMVPDPAWLAGIQISSTSPSSPTFSLMSSNPFSVFKEAIPGGGSSRMCTPGQSGTCSPVIPGMARHPDVHMMDVVSDEFAFGSSTNGGAQQATAGLVRAWEGERIHEDSGSDELELTLGSSRTRS
TraesCS3B02G142600	TaBZR2.3	MEGVAKSIMAPMEVAGAGREEAEAAMEVAGRRGCIRSTRGPWTVRRQARGGAVKTSLRHPTPRERENNRQRERRRRQVATRIYAGLRANAGYALPKHADQNDVLRALCAEAGYVVDDEGNVTRCPERSPGVGASGSSDHLQPSSHSGATEATAGDIHQALLEPEAEPKHKISLELTLSFSYM
TraesCS3B02G156600	TaBZR2.4	MATGGGGGGADFGAAGGAGGRMPTWRERENNKRRERRRRAIAAKIFSGLRAHGGYKLPKHCDNNEVLKALCNEAGWVVEPDGTTYRKGCRPAERMDGIGCSVSPSPCSSYQPSPRASYNASPTSSSFPSGASSPFLPHSNNMVNGVDATPILPWLQTFSNSTASNKRPHLPPLLIHGGSISAPVTPPLSSPTARTPRMKTDWDESVIQPPWHGSNSPCVVNSTPPSPGRQMVPDPAWLAGIQISSTSPSSPTFSLMSSNPFSVFKEAIPGGGSSRMCTPGQSGTCSPVIPGMARHPDVHMMDVVSDEFAFGSSTNGGAQQATAGLVRAWEGERIHEDSGSDELELTLGSSRTRS
TraesCS3D02G125100	TaBZR2.5	MEGVAKSIMAPMEVAGAGEEEAMAVAAGRRGCIRSTRGPWTVRRQARGGAVKTSLRHPTPRERENNRQRERRRRQVATRIYAGLRANAGYALPKHADQNDVLRALCAEAGYLVDDEGNVTRCHERSSGAGTGGSSDHPQPSSHSGATEATAGDIHQPLPEAEPKHKISLELTLSFTYM
TraesCS3D02G139300	TaBZR2.6	MATGGGGGGGGGGADFGAAGGAGGRMPTWRERENNKRRERRRRAIAAKIFSGLRAHGGYKLPKHCDNNEVLKALCNEAGWVVEPDGTTYRKGCRPAERMDGIGCSVSPSPCSSYQPSPRASYNASPTSSSFPSGASSPFLPHSNNMVNGVDATPILPWLQTFSNSTASNKRPHLPPLLIHGGSISAPVTPPLSSPTARTPRMKTDWDESVIQPPWHGSNSPCVVNSTPPSPGRQMVPDPAWLAGIQISSTSPSSPTFSLMSSNPFSVFKEAIPGGGSSRMCTPGQSGTCSPVIPGMARHPDVHMMDVVSDEFAFGSSTNGGAQQATAGLVRAWEGERIHEDSGSDELELTLGSSRTRS
TraesCS4B02G009900	TaBZR3.1	MLRLDPGEYDEETMGGAVKEEDDSDEEGEEDDFLVAGDEPRPPEQQGRRRGRGREEKERTKARERRRRAVTGRILAGLRRHGGFGLRSRADVNEVVAALARHAGWVVLPDGTTFPSSSHPQLGVVSVKGEVAEADELVAQLRVLKAAGVDGVMVDCWWGNVEAHRPQEYNWAGYKRLFHIIRDLKLKLQVVMSFHECGGNVGDDVSIPLPEWVIEIGKSNPDIYFTDREGRRNTECLSWGIDKERVLQGRTAVEVYFDFMRSFRVEFDEYFEDGIISEIEVGLGACGELRYPSYAANHGWKYPGIGEFQCYDRYLQKNLRRAAEARGHAMWAKSPDNAGHYNSEPNNTGFFCDGGDYDSYYGRFFLNWYAQVLLDHADRVLMLARLAFEGSAIAVKVSG…
TraesCS4D02G006100	TaBZR3.2	MLRLDPMGGAVKEEDGEGEDSDEEEEEDFLVADAAAGDEQHARPPERRRGRGREEKERTKARERRRRAVTGRILAGLRRHGGFGLRSRADVNEVVAALARHAGWVVLPDGTTFPSHPQTPRPAMLAPAISLSSPSAAAAALPTLLPVSSSSCAPGIAVPPLAARPISRRAGCAPALRTAAASSPFAVSRAVPEGGPASPLLAVPVPDDEDADAAMDGGDGGEQTGLATRPAVAPPRPPPERDFAGTPYVPVYVMLPLGVVSVKGEVAEADELVAQLRVLKAAGVDGVMVDCWWGNVEAHRPQEYNWAGYKRLFHIIRDLKLKLQVVMSFHECGGNVGDDVSIPLPEWVIEIGKSNPDIYFTDREGRRNTECLSWGIDKERVLQGRTAVEVYFDFMRSFR…
TraesCS6A02G085800	TaBZR4.1	MATKHPHGDADPSTSPPPPPSRRPRGFASASTPAAPPPPGRRRGEREREREKERTKLRERQRRAITSRMLAGLRQHGNFPLPARADMNDVLAALARAAGWTVHPDGTTFLSSPQPSLPPPAQFGAFQATSLETPVFTNSLNSYAIGTPIDSQASALQTDDSLSPSSLDSVVVAEQSIKNESYGNSSSANSLNCMGSDQLLRASAVWAGDFTKTPYIPVYASLSMGIINCYCQLVDPEAVRAELRHLKSLNVDGVVVDCWWGIVEAWTPQKYEWSGYRDLFGIIKEFKLKVQVVLSFHGSGECGSGGVLIALPRWVIEIAQENQDIFFTDREGRRNTECLSWGIDKERVLRGRTGIEVYFDFMRSFHMEFRSLSEEGLISAIEVGLGASGELRYPSCPEK…
TraesCS6A02G338000	TaBZR4.2	MASRVPTWRERENNRRRERRRRAVAANIFHGLRARGGYALPKHCDNNEVLKALCDEAGWTVEPDGTTYRKGSKPVTAEGTNPMVRSGSPSPCSSHQVSPRASFPTSGTSSHTTLGGGRGSCYEGGSLIPWLKNLSSGSGFASSSKFPRYSPHSYYFSGGSISAPVTPPSGSPRRMPCLNAGWGEYPSAQVQPPWVGAGGSGYDDYASLPNSTPSSPRGGQGVGPDPAAWLSGFQISSAGPSSPTYSLMAPSNPFRVSGEMAAATASSSRMRTPCQSGTCSPVALAVHGDVQMGARAEDDFEFGSGGRPVSVNAWEGERIHEVCASDEPELDLTLGLGSSNTRASALN
TraesCS6B02G116400	TaBZR4.3	MATKHPHGDADPSTSPPPPPSRRPRGFASASNPPAPPPPGRRRGEREREREKERTKLRERQRRAITSRMLAGLRQHGNFPLPARADMNDVLAALARAAGWTVHPDGTTFLSSPQPPLPPPAQFGAFQATSLETPVFTNSLNSYAIGTPLDSQASALQTDDSLSPSSLDSVVVAEQSIKNESYGNSSSANSLNCMGSDQLLRASAVWAGDFTKTPYIPVYASLSMGIINCYCQLVDPEAVRAELRHLKSLNVDGVVVDCWWGIVEAWTPQKYEWSGYRDLFGIIKEFKLKVQVVLSFHGSGECGSGGVLIALPRWVLEIAQENQDIFFTDREGRRNTECLSWGIDKERVLRGRTGIEVYFDFMRSFHMEFRSLSEEGLISAIEVGLGASGELRYPSCPEK…
TraesCS6B02G368700	TaBZR4.4	MASRVPTWRERENNRRRERRRRAVAANIFHGLRARGGYALPKHCDNNEVLKALCDEAGWTVEPDGTTYRKGCKPPAAAEGANPVVRSGSRSPCSSHPVSPRAPYNPRAGPSTFPTSGTSSHTTLGGGSSYYEGSSFIPWLKNLSSGSGFASSSKFPRYSPHSYDYFSGGSISAPVTPPSGSPRRMPHLNTGWGEYPSVQVQPPWFSAGGSAYDDYASLPNSTPSSPRGGHGVGPDPAWLSGFQISSAGPSSPTYSLMAPSNPFRVSGEMAAATASSSRMRTPCQSGTCSPVALAAHGDVQMEHREADDFAFGSGGRPVLVNAWEGERIHEVCASDEHELDLTLGLGSSKTRAGAVN
TraesCS6D02G318800	TaBZR4.5	MASRVPTWRERENNRRRERRRRAVAANIFHGLRARGGYALPKHCDNNEVLKALCDEAGWTVEPDGATYRKGSKPLAAEGANPMVRSGSPSPCSSHQVSPRASFPTSGTSSHTTLGGGGGSGSYYEGSSFIPWLKNLSSGSGFPSSSKFPRYSPHSYFSGGSISAPVTPPSCSPRRMPCLNAGWGEYPSAQVQPPWFGAGGSGYDDYASLPNSTPSSPRGGSHGVGPDPAWLSGFQISSAGPSSPTYSLMAPSSSFRVFGEMAAATAGSSRMCTPAQSGTCSPVMLAVHGDVQMGARAEDDFEFGSGGRPVSVNAWEGERIHEVCASDEPELELTLGLGSSKTRAGAVN
TraesCS7A02G354800	TaBZR5.1	MMHGPAGGSGGGGGHGLGGTRVPTWRERENNRRRERRRRAIAAKIYTGLRAYGNYNLPKHCDNNEVLKALCNEAGWVVEPDGTTYRRGCKPPPQARPDPMRSASASPCSSYQPSPRASYNPSPASSSFPSSGSSSHITLGGGNNFIGGVEGSSLIPWLKNLSSNPSFASSSKLPQLHHLYFNGGSISAPVTPPSSSPTHTPRMKTDWESQCVLPPWAGANYTSLPNSTPPSPGHHVAPDPAWLAGFQISSAGPSSPTYNLVSHNPFGIALASSSRACTPGQSGTCSPVMGDHAPAHHDVQMEMADGAPDDFAFGSNSNGNNGSPGLVKAWEGERIHEECASDELELTLGSSRTRGEQPF
TraesCS7B02G272900	TaBZR5.2	MMHGPAGGSGGGGGHGLGGTRVPTWRERENNRRRERRRRAIAAKIYTGLRAYGNYNLPKHCDNNEVLKALCNEAGWVVEPDGTTYRRGCKPPPQVRPDPMRSASASPCSSYQPSPRASYNPSPASSSFPSSGSSSHITLGGGNNFIGGVEGSSLIPWLKNLSSNPSFASSSKLPQLHHLYFNGGSISAPVTPPSSSPTHTPRMKTDWESQCVLPPWAGANYTSLPNSTPPSPGHHVAPDPAWLAGFQISSAGPSSPTYNLVSHNPFGIALASSSRACTPGQSGTCSPVMGDHAPAHHDVQMEMVEGAADDFAFGSNSNGNNGSPGLVKAWEGERIHEECASDELELTLGSSRTRGEPPF
TraesCS7D02G368000	TaBZR5.3	MMHGPAGGSGGGGGHGLGGTRVPTWRERENNRRRERRRRAIAAKIYTGLRAYGNYNLPKHCDNNEVLKALCNEAGWVVEPDGTTYRRGCKPPPQARTDPMRSASASPCSSYQPSPRASYNPSPASSSFPSSGSSSHITLGGGNNFIGGVEGSSLIPWLKNLSSNPSFASSSKLPQLHHLYFNGGSISAPVTPPSSSPTHTPRMKTDWESQCVLPPWAGANYASLPNSTPPSPGHHVAPDPAWLAGFQISSAGPSSPTYNLVSHNPFGIALASSSRVCTPGQSGTCSPAMGDHAPAHHDVQMEMVEGAADDFAFGSNSNGNNGSPGLVKAWEGERIHEECASDELELTLGSSRTRGEPPF
TraesCSU02G078100	TaBZR6	MATKHPHGDADPSTSPPPPPSRRPRGFASASTPAAPPPPGRRRGEREREREKERTKLRERQRRAITSRMLAGLRQHGNFPLPARADMNDVLAALARAAGWTVHPDGTTFLSSPPPPLPSPAQFGAFQATSLETPVFTNSLNSYAIGTPLDSQASALQTDDSLSPSSLDSVVVAEQSIKNESYGNSSSANSLNCMGSDQLLRASAVCAGDFTKTPYIPVYASLSMGIINCYCQLVDPEAVRAELRHLKSLNVDGVVVDCWWGIVEAWTPQKYEWSGYRDLFGIIKEFKLKVQVVLSFHGSGECGSGGVLIALPRWVLEIAQENQDIFFTDREGRRNTECLSWGIDKERVLRGRTGIEVYFDFMRSFHMEFRSLSEEGLISAIEVGLGASGELRYPSCPEK…
Gene ID	Gene Name	Promoter sequence
TraesCS2A02G187800	TaBZR1.1	CAGAGCAAAGCTGAGCAATGGCAAGCAGGGCACCTCCACAGCGAAAATAAGATCAAGCCCCCGGAGAACTCTACACAAGCTAGAACAACCGAGCAACTGCAAGCAGTAGACTGCACAAGTGAATGCCGAGAGGAACCAGGCTGCGTGAAGAAAAACATGGCTCCAGATCTAGCCGCCCCAAGCCTTGCTGGAGGGGAGATCCAATCGCCCCTACGCCCGAACCGTGCCGCAACACGCGGACGCAGTCCACCGACCGGCTGCCCAGAGCCGAACAAGATGAAGAGTCGCTGAAGGATTGCAGGGGGACCGCCTTGTCACCACCATAACCGCCGTCCCGGAGAGCAGAGGAACACCGCCGCCACCAAACACCTTGCCACGGGACCACAACCTCACCCTCCC…
TraesCS2B02G219300	TaBZR1.2	TGGTGTCCAGTTTAGCCTGGGCCTCATACCCATCTAACTGCGTCCCACTCTGAATCAGCAAGTGTTAGGGCCTCACACCCATCCGCAAACCGCCCCCCAGCCACAACATCCGAATCGAGCCCACCAGAGCCCAATAGGAAATTCAAACGCTGGATCCTTGCAGCGCGGATCTCAGCCGATCCGCTGGCCGCCGGCGCCGGCACCGCCGCCGCCACCGCCAGCTTCTTCTTCTTCTTTCTCTGAACCAACTTCCACGCCCCGGCCTCGAAATAATCAGACAAGGTAGGTTTGGGGAGACATACCTTGGGTAGAGGACCTCGCCAAGGCCGGATCGCCGAAGCCGTCGTACGACGATGGACGACCCGCCGGACTATCTCAACGGCGTCATCATCAAGTCCC…
TraesCS2D02G199900	TaBZR1.3	CTCACGCATCATCGGAAGAGCAGCAAGGATGATGTAGAAGTCCTCCGTGATCGATTCCCCCTTCGGCAGAGTACCGAAAAAGGCCTCCAGATGGGATCGTGGAAGAACAGAGACTTGCGACGGTGAAAAAAGTGTTTCGGGGGCTCTCTGTTGTATTGGGGATATTTGAGAATTTATAGAAGCGGAATTAGGTCAAGAGATGCCATAAGGGGCCCACAAGCTCAGGGGGCGCGCCCGGTAAGCTTGTCGCTCCCTCGTGATTCTTCTGGTCTTCTCCCAAACCTTCCAGGGTCTCTCTTGGTCCAAAAAAATCATCAAAAAGTTTCGTAGCGTTTGGACTCTGTTTGGTATTGATTTTCTGAAAAGTCAAAAACAAACAACTGGCACTGGGCACTAGGT…
TraesCS3A02G123500	TaBZR2.1	AAGGATTTTCATCAAAGAAATATAGTATAAGTTAAAATAAAAGACATCTGCATCCACCCTCTTGCTGGATCCAAAAAAAAAGAATAATAAGGCAGATGAAGGTGTGTATATGAATCTCACCTGCGTACTTCCTCAAGCTGCGTGACGGAAGGCAGGAGCTAGGTGAGGAGGTCGAGGAGCACTGCGACAGCCTCCCGAGGAGAAGCGGACTGGAGATCCGGAGGTCTATGCTCCCCGTTGTCTTCCTCCTCTCGCCATCCCCGACTAGGACTCTTCTGGCGAATTTGAGTAGCAGATTTTTTTCATCCAATTTCTTCCTAGCAACCAACAAAGATCACATCAAAACATAGAATCACAGTAAACCAACAAAGCAACCAGATTTGCACGCCCCAGTGCCGC…
TraesCS3A02G139000	TaBZR2.2	GTATCAAATTTTCGGTTAATACAATTCTAGCATGAATAATAAACATATATCATGATATAAGGAAATATAAATAACAACTTTATTATTGCATCTAGGGCATATTTCCTTCATCATAGTCAATGCCACCCACCCACCTCGGGCCCGCACGACGGCGACTGGAAGCGTCTAGAGTCCACGTCCTTTTAAATGGCAAGCATGCTGGGGGTCTCATCCACTTCTCCTTCCACCCCCGTTCACATCTGGCCACGCGTGCTCTGTTGCCGGCAACAAAACCCTAGGCACACCATCGCCATGAGTGCTTTAGCAAAGGAAAGCATGACCATGAGGCTGGCTCATCGTGAGGCCTGCCTAGCTTCACATTGGTGCCGCGAGGGATGGGAGGAGGGGGACTCGACGGCC…
TraesCS3B02G142600	TaBZR2.3	CGGTGCGTTCATCCGCGAATTTGAGCTGTGATTTTGCGACCGAATTAACGCACACAGTGAAACTGAACTTACCACTCACGTACTCTGTGAAACCTTACAAGCACAACGCATGTGACAGCAATGTGACAAAAAATATGGCGTGCTAGTAAATATGCTGTATATTTGCGTAACACTCGAAGATAGCAGTAGATAAGATGGAAAACAAGAGAGATCAGCTTAAAGTTGCATCATCCCGAAAAATGCTTCTGAAGCTGCGAAAGCACGGAGCAGTGACTTCCTTTTACCTCGGTCCTTCTGCTATTCCGCCTACCATACGTGCCACTTTACCCGCGCGCCGCGCGGTTAAATTCCATACGCAGTGGCATCTTTTTTTATTTGGAGGCAGCAGTGGCATCTCTC…
TraesCS3B02G156600	TaBZR2.4	TTTCGGCTGATTTTTTTATATGTTGCAAAAATAGCTTTTAAAAAAGCCACAAAGCGGGCGCGAGGACAAAAATGTATCTGCGCGTTGGACGCACTGCCGACCCAAACGCGGAAGGGGCAGACACACCGACCCAAATAGATAAATTGCGGACAAAACACACGTCCATTTGAGTCGGCGCGTTGGAGTTGCTCTAAGTAAAACCTCATTTGGTTAATAGGCTAGGCAACCATAGAAATTGGAAAGTCACAAGAAATGAGATGACATGTATCTCAAATCCAGGGACAAATTCAAGGGGGAGGGGGTGGGTACTCTCTGATTAAATTCTAGCTAACTTTTTTAACACAATACATACGCATGCGCTCACCCCTATGAACGCACACGCGCACACCCTACCCCTAT…
TraesCS3D02G125100	TaBZR2.5	TTTGGGCCGGAAATGGGTCGGCGCGGACGCCGGGCGGACACAATTTAAGTTTGGGTCGGCGTGTTGGGCCGCCACTTTTTTCGCGCCGACCCAAACGGACGCGGGCGGACGAAAGATGCTCTTAACGCACGCACTGAAACTGAACTTACTACTCACGTACTCTGTGAAACCTTACAAGCACAACGCATGCGACAGCAATGTGACAAAAATATATGGTGTGCTGGTAAATATGCTGCACATTCGCGTAACACTCGAAGATAGCAGTAGATAAGAAGGAAAACAAGAGAGATCAGCTTAAAGTTGCATCATCCCGAAAAATGCATATGAAGCTGCGAAAGCGCGGAGCGGTGACTTTCTTTTACCTCGGTCCTTCTCCTATTTCGCCTACCATACGTGCCA…
TraesCS3D02G139300	TaBZR2.6	GAAACTTCTAATTTAAGTTGAATTGTTCATAGCTTACGCCAATTTTCTTCGCTTGATTAGGATATAATTCATCAAACTAGACTATTGTCCCGCTGAAAAAAACCTAGGCTACTGTGTCTCTGCATGATCTTCTTATGAGTCTCAACACTAAAGCTAGTTATCTTATACAAGACTTTTCTATAAGGTCTGCAAGCAGGTTCAGGTGGAAGCAAGAAAGTAACACCATCTGGTTTTAGACCGGGTGTAACTCTTTCTCTTTTGCCCTTTATGCCAGCCTGTTCCCTAAGTAGGATAAGTTTATTGTGTTATTACAGGTACGTAGGTTTGAATCCTGCCTCTCCCACTTGTTGTAGACGTAAGAGAAGAGAAAGTAGGCGGAAGCCTAGGAGGGCCAACCGA…
TraesCS4B02G009900	TaBZR3.1	NNNNNNNNNNNNNNNNNNNNNNNNNNNNNNNNNNNNNNNNNNNNNNNNNNNNNNNNNNNNNNNNNNNNNNNNNNNNNNNNNNNNNNNNNNNNNNNNNNNNNNNNNNNNNNNNNNNNNNNNNNNNNNNNNNNNNNNNNNNNNNNNNNNNNNNNNNNNNNNNNNNNNNNNNNNNNNNNNNNNATCCTTTTGAAGCTGGCATTGTGGAGGTGATATTGGGAGTACTACAGGTCGTCGTGGTGGAGTTGGGCACCCTCGTTACGTCCACGCACCTCACGCATGCCGCGAACGACGCGACACCATCTACGCCACCCTATGGCCGCCCAATCTCTTGCCTGCGCCATCCCGCTGTGCATACTCAATGGACACTAATCATGCTGCTGGCATTCTCTGAACATAATT…
TraesCS4D02G006100	TaBZR3.2	CGAAAACATTCCTCAGAGTGTCTGAACATGGTGACGGCGCAGCCACTCGGTTCACGCACCCACTGTTTTTTTGCCCAAAAAAGTTCAGTTGATCCGTTTCGAGCATGCAGCGAGTGTTCTGTTGATGTTGATCAGACACAACCAATGTTTTCGTCAAGTGCGATGAGTTTGTGAAAGAAAGGTGATGACGCAGACAGATACTCAATTGTCAATTCGCATCCAGAAGTCGAGTCAGTGCTTGTTTAGATAATTGTCGAAACATTGTATGTGGATAAGCAAACCACTAGCAGTAAAGTAAACTAGAAAGAGTTTGGATGATTGGTGGTGCAGATTTCGCCAAACTGGACTAAACAATTGGCCACTGTGATGGATGCTGATGATGCTCCCTTGCAATGCACA…
TraesCS6A02G085800	TaBZR4.1	ACACATGTAGAAATCTTCATACGAAAACGATCCTCCCATCAGAGAATTGCCCCATGTGTCTATAGGATACCGAAACATGCACACACTTATTCCTCCTATGCTGTAAAGCAATAGCTATATGACATGCCTTGGCATCAGGCCAAACTGCACCGACATTAAGCTCATATGGAAGATCAATGTCCCACGACGTCTTCCTATCTCACCACAACCTTTCATGACACTGCTGATCCTCTGACAAATTTGGGATGTCAGGAATGCTTTGGTTTTCACGCAATGACACTCATCACTGGCTGATGTACTTTTTCTTTGCATGGTAATACATGTCTCATTCATATCATAAAGATCAAAGTACAAGTCACGTAAAGACCGATATGACCAAACTGAAAAGATAGCAGAACA…
TraesCS6A02G338000	TaBZR4.2	TCACTCATTTTAAAAAATTGGTTTCGCCCAATTCAAAGAACATATTCCACTATTTTCAGAAAGCTGATTTCACGCATTTCAAACATTGAAATTTAGACTTGTTTGAATGTATTCAAGATTGATCTTGTTCTAAAGGTGTTGGCTCCAGGAGTGAAAAGGGAATTAAAAGTGATGGATTTAGAGATGGAGATAGGAGATAATGTCAGAGACATGCATGTCATAGTTTGTACCCTAAGTAGTAAAAAGAGAGAAGCTGGACCATGCATGCGTCCTTTGCATGCGCATGGTGGGTCCGGTCTGATGAAATATGGTGACGTAAATATAGCAAAGAGGGGAATACAAATGTACACCTTTTGAGCTGGCAACATGCTATTAGTGAGAGAACCACATGTACATACC…
TraesCS6B02G116400	TaBZR4.3	CAGCAGATGAACTAACTGATAGTTCATCTTGATGGATAGTTTATCACCATTTAATTGCCTTTGTTCCTGGACAAGCCCAAGTGGGCTCTAGGACTACTGAAGTTATCTTGTCATGCCATTGACATAAATCTTTTTTCATATATTTACAATCAAATTTTATCATGGTGACAAATCAAACTAGTTTATAGTGTGACACTTGAATAAGCTAATTTTTCTTTTCTTTCTTTTCTTTTCGTTAAGGTTGTTGAGTTCCTACAAATTGCATCAAACATGATAAATAGGAGTATGTGACTAAGAATATCATTATCACGACTAGGTATTAACCTCCACCCGTGCAATGCAAGAATTGGTCCCGATTTGTGCTCTACTGCAGGTGTGTTACACATTATCGCGACTAGG…
TraesCS6B02G368700	TaBZR4.4	TGATCTTGTTCTAAAGGTGTTGGCTCCAACAATTCAAATTATACAAAGTTTTGAAAACAAATTTTTTGTTTTGAAGATATGAACAACCTAAATAGTGAGAAGGGAATTAAAAGTGACGGATTTAGAGATGGAGAGAGGAGAGATAATGTCAGAGATATGCAGGTCATAGTCTACCCTGAGCGGTAAAAAGAGAGAAGTAGGACCATGCATGCGTACTTTGCATGTGCATGGTGGGTCCGGTTTGATGAAATATGTTGACTTAAATAGAGAAAAGAAGGGAATACAAATGTGCACAGGTACATACCGGAACCGGTAATATACACTTGCGTTTACAGGTGTTTTACAGGCAAGTGGGTTTTGATTGGAGATTAAGGGGGAGGAGGGGCCACCCCAGTGAAA…
TraesCS6D02G318800	TaBZR4.5	GAGACATGCATGTCATAGTCTTTACCCTGAGCAGTAAAAAGAGAGAAGCAGGACCATCCATGCGTCCTTTGCATGTGCATGGTGGGTCAGGTTTGATGAAATATGGTGACTTAGATAGAGAAAAGAGGGGAATACAAATGTACACCTTTTGACCTGGCAGCATGCTATTAGTGAGAGAACCACAGGTACATACTGGAACCGGTAATAAGCACTTTGCGTTTACATNNNNNNNNNNNNNNNNNNNNNNNNNNNNNNNNNNNNNNNNNNNNNNNNNNNNNNNNNNNNNNNNNNNNNNNNNNNNNNNNNNNNNNNNNNNNNNNNNNNNNNNNNNNNNNNNNNNNNNNNNNNNNNNNNNNNNNNNNNNNNNNNNNNNNNNNNNNNNNNNNNNNNNNNNNNNNN…
TraesCS7A02G354800	TaBZR5.1	TTTGGCTTGGCAATAGGATAGGAGAGGATGCATGGTGCCGGTGCACGAGCACGATGGCTTAGCTAAAACGGGCAGAATTGGTCTGCCCAAACATCAGAAGAAACAAGTAGTGCTACTCTTAACTTTTGCTAGGGAGAAAACAAGCACACGTAGGTTGATTATAGTCTCAACTAGCACTAGTGAGGATCGGAGCAGGCTGGCTGGCATTTATGTGTTTGTCATGTTTTGCTTGTCAGCACCTGCATGCCACCGAGCCTTGACAAATGGACACGGGGCTAGCTAGCTAGGCGGCGGCTACACCCACACACACGTAGAGATTATTCTATGGTGTATGTATAGACGAGATGGTGTAAGTAGAGGAGCACCAGAGTGGATTACATGGGAATAATAGACCATTGA…
TraesCS7B02G272900	TaBZR5.2	CTGAGCCTTGACAAATGGACAATGAGGCTAGCTAGCTAGGCGGCGGCTACGTACACGTACTATCCTACGTTATAGACTATAGAGTATGTATAGAGAAAGTAGAGGAGCACCGGAGTGGGTTAGAGGCGAATAATAGATCATTGAATTCATCAACCTGTCGGACTCATCACGTAACTACTTGTCTAGTTTAATCTACTAGCAGTGCACATGCAGTGTTTTGCAAACTTTTGTTAATTTGATTTGAGGATGGGGGGAGCCTACGTGGTTGGTCAACCTCATTCATTGCCATTGAGGGAGGGAGGGAGGTTCATGATTGAAGAACAAGCTTTTGATCAAGGAACAAAGCCCTATATTCACAAGTTGATAGGGTAGATACTCGATCGCAAAGTGCCGCAATAT…
TraesCS7D02G368000	TaBZR5.3	GTTTGTCATGTTTTGCTTGTCAGCACCCGCCCCTGAGCCTTGACAAATGGACATTGGGCTAGCTAGGCGGCGGGCGGCGGCTACGTACACGTACTAGATAGTAGATGGTATTATCCTACGTTATAGAGTATGTATAGAGAAAGTAGAGGAGCACCAGAGTGGGTTAGAGGCGAATAATACATCACTGAATTCATCAACCTGTCGGAATCGACATCACGTAACTAAGTACTTGTCTAGTTTAATCTACTAGTAGCGCAGATGCAGTGTTTCGCAAACTTTTGTTAGTTTGATTTGATAATGGGGGGGAGCCTACATGGTTGGTCAACCTCATTCATTGCCATTGAGGGAGGTTCATGATTGAAAAAACAAGCTTTTGATCAAGGACCAAAGCCCCCTCCA…
TraesCSU02G078100	TaBZR6	TGGGTCTAGCTTTGGGCTTCTTCATGGGAGTGGCAACTTGCTTGCCATTCTTCTTGAAGCTTCCTTTCTTTCCCTTGCCCTTTTACTTGAAACTAGTGGTCTTGTCAATCATCAACATTTGATGCTTTTTCTTGATTTTTACCTTCATCGATTTCAGCATTACGAAGAGCTCGGGGATCGTTTTCGTCATCCCTTGCATATTATAGTTCATCATGAAGTTCCAGTAACTTGGTGATAGTGACTAGAGAACTCTGTCAATCACTATCTTATCTGGAAGATTAACTCCCACTCGATTCAAGCGATTGTAGTACTCAGATATACTGAGCACATGCTCACTGGTTGAGCTATTCTCCTCCACCTTGTAGGCAAAATACTTGTCAGGGGTCTCATACCTCTTGA…
