# Supplementary material for: Genome-Wide Identification and Characterization of the Brassinazole-resistant (BZR) Gene Family and Its Expression in the Various Developmental Stage and Stress Conditions in Wheat (Triticum aestivum L.)
Source: Int J Mol Sci. 2021 Aug 14;22(16):8743. doi: 10.3390/ijms22168743 (PMC8395832; doi:10.3390/ijms22168743)
Supplement: Supplementary file 1 [file ijms-22-08743-s001.zip › Table S3.xls]

## Sheet: Sheet1
Table S3. Ratio of Ka/Ks and distribution of duplicate wheat BZR genes.
Duplicated TaPIN gene pairs	Identity (%)	Ka	Ks	Ka_Ks	Duplication time (Mya)	Duplication type	Types of selection
TaBZR4.3/TaBZR6	76	0.038319	0.052091	0.735617	4.007	WGD or segmental	Purify selection
TaBZR3.1/TaBZR3.2	100	0.00163166	0.154426	0.0105659	11.8789	WGD or segmental	Purify selection
TaBZR2.1/TaBZR2.3	75	0.0652159	0.118693	0.549453	9.13019	WGD or segmental	Purify selection
TaBZR1.1/TaBZR1.2	34	0.0057762	0.0777114	0.0743289	5.9778	WGD or segmental	Purify selection
TaBZR2.2/TaBZR2.6	35	0.00125235	0.213749	0.00585896	16.4423	WGD or segmental	Purify selection
TaBZR4.2/TaBZR4.4	51	0.0438623	0.0632154	0.693854	4.86273	WGD or segmental	Purify selection
TaBZR5.1/TaBZR5.2	34	0.00623834	0.320583	0.0194594	24.6602	WGD or segmental	Purify selection
