# Supplementary material for: Genome-Wide Identification and Characterization of the Brassinazole-resistant (BZR) Gene Family and Its Expression in the Various Developmental Stage and Stress Conditions in Wheat (Triticum aestivum L.)
Source: Int J Mol Sci. 2021 Aug 14;22(16):8743. doi: 10.3390/ijms22168743 (PMC8395832; doi:10.3390/ijms22168743)
Supplement: Supplementary file 1 [file ijms-22-08743-s001.zip › Table S4.xls]

## Sheet: Sheet1
Table S4. Orthologous relationships of TaBZR genes with other BZR genes in B. distachyon, Ae. tauschii, T. dicoccoides, O. sativa and A. thaliana.
T. aestivum (AABBDD)		B. distachyon (BB)
Chromosome	Gene name	Chromosome	Gene ID
2A	TaBZR1.1	1	BRADI_1g23550v3
3A	TaBZR2.1	2	BRADI_2g04790v3
3A	TaBZR2.2	2	BRADI_2g06400v3
6A	TaBZR4.1	3	BRADI_3g02800v3
6A	TaBZR4.2	3	BRADI_3g08967v3
7A	TaBZR5.1	1	BRADI_1g38180v3
2B	TaBZR1.2	1	BRADI_1g23550v3
3B	TaBZR2.3	2	BRADI_2g04790v3
3B	TaBZR2.4	2	BRADI_2g06400v3
4B	TaBZR3.1	2	BRADI_2g00824v3
4B	TaBZR3.1	4	BRADI_4g38630v3
6B	TaBZR4.3	3	BRADI_3g02800v3
6B	TaBZR4.4	3	BRADI_3g08967v3
7B	TaBZR5.2	1	BRADI_1g38180v3
2D	TaBZR1.3	1	BRADI_1g23550v3
3D	TaBZR2.5	2	BRADI_2g04790v3
3D	TaBZR2.6	2	BRADI_2g06400v3
4D	TaBZR3.2	2	BRADI_2g00824v3
4D	TaBZR3.2	4	BRADI_4g38630v3
6D	TaBZR4.5	3	BRADI_3g08967v3
7D	TaBZR5.3	1	BRADI_1g38180v3
Un	TaBZR6	3	BRADI_3g02800v3
T. aestivum (AABBDD)		Ae. tauschii (DD)
Chromosome	Gene name	Chromosome	Gene ID
2A	TaBZR1.1	2	AET2Gv20403100
3A	TaBZR2.1	3	AET3Gv20271200
3A	TaBZR2.2	3	AET3Gv20298900
6A	TaBZR4.1	6	AET6Gv20227200
7A	TaBZR5.1	7	AET7Gv20911700
2B	TaBZR1.2	2	AET2Gv20403100
3B	TaBZR2.3	3	AET3Gv20271200
3B	TaBZR2.4	3	AET3Gv20298900
4B	TaBZR3.1	4	AET4Gv20009500
6B	TaBZR4.3	6	AET6Gv20227200
7B	TaBZR5.2	7	AET7Gv20911700
2D	TaBZR1.3	2	AET2Gv20403100
3D	TaBZR2.5	3	AET3Gv20271200
3D	TaBZR2.6	3	AET3Gv20298900
4D	TaBZR3.2	4	AET4Gv20009500
7D	TaBZR5.3	7	AET7Gv20911700
Un	TaBZR6	6	AET6Gv20227200
T. aestivum (AABBDD)		T. dicoccoides (AABB)
Chromosome	Gene name	Chromosome	Gene ID
2A	TaBZR1.1	2A	TRIDC2AG023960
2A	TaBZR1.1	5B	TRIDC5BG028340
3A	TaBZR2.1	3A	TRIDC3AG015390
3A	TaBZR2.1	3B	TRIDC3BG019950
3A	TaBZR2.2	3A	TRIDC3AG017440
3A	TaBZR2.2	3B	TRIDC3BG022230
6A	TaBZR4.1	6A	TRIDC6AG010830
6A	TaBZR4.1	6B	TRIDC6BG016440
6A	TaBZR4.2	6A	TRIDC6AG050670
6A	TaBZR4.2	6B	TRIDC6BG059240
7A	TaBZR5.1	7A	TRIDC7AG049560
7A	TaBZR5.1	7B	TRIDC7BG044290
2B	TaBZR1.2	2A	TRIDC2AG023960
2B	TaBZR1.2	5B	TRIDC5BG028340
3B	TaBZR2.3	3B	TRIDC3BG019950
3B	TaBZR2.3	3A	TRIDC3AG015390
3B	TaBZR2.4	3B	TRIDC3BG022230
3B	TaBZR2.4	3A	TRIDC3AG017440
4B	TaBZR3.1	4B	TRIDC4BG000600
4B	TaBZR3.1	4A	TRIDC4AG046860
6B	TaBZR4.3	6B	TRIDC6BG016440
6B	TaBZR4.3	6A	TRIDC6AG010830
6B	TaBZR4.4	6B	TRIDC6BG059240
6B	TaBZR4.4	6A	TRIDC6AG050670
7B	TaBZR5.2	7B	TRIDC7BG044290
7B	TaBZR5.2	7A	TRIDC7AG049560
2D	TaBZR1.3	4A	TRIDC4AG039960
2D	TaBZR1.3	1A	TRIDC1AG054780
2D	TaBZR1.3	2A	TRIDC2AG023960
2D	TaBZR1.3	5B	TRIDC5BG028340
3D	TaBZR2.5	3A	TRIDC3AG015390
3D	TaBZR2.5	3B	TRIDC3BG019950
3D	TaBZR2.6	3A	TRIDC3AG017440
3D	TaBZR2.6	3B	TRIDC3BG022230
4D	TaBZR3.2	4A	TRIDC4AG046860
4D	TaBZR3.2	4B	TRIDC4BG000600
6D	TaBZR4.5	6A	TRIDC6AG050670
6D	TaBZR4.5	6B	TRIDC6BG059240
7D	TaBZR5.3	7A	TRIDC7AG049560
7D	TaBZR5.3	7B	TRIDC7BG044290
Un	TaBZR6	6B	TRIDC6BG016440
Un	TaBZR6	6A	TRIDC6AG010830
T. aestivum (AABBDD)		O. sativa
Chromosome	Gene name	Chromosome	Gene ID
2A	TaBZR1.1	7	Os07g0580500
3A	TaBZR2.1	1	Os01g0176900
3A	TaBZR2.2	1	Os01g0203000
6A	TaBZR4.1	1	Os02g0129600
6A	TaBZR4.2	2	Os02g0233200
7A	TaBZR5.1	6	Os06g0552300
2B	TaBZR1.2	7	Os07g0580500
3B	TaBZR2.3	1	Os01g0176900
3B	TaBZR2.4	1	Os01g0203000
4B	TaBZR3.1	9	Os09g0569200
6B	TaBZR4.3	2	Os02g0129600
6B	TaBZR4.4	2	Os02g0233200
7B	TaBZR5.2	6	Os06g0552300
2D	TaBZR1.3	7	Os07g0580500
3D	TaBZR2.5	1	Os01g0176900
3D	TaBZR2.6	1	Os01g0203000
4D	TaBZR3.2	9	Os09g0569200
6D	TaBZR4.5	2	Os02g0233200
7D	TaBZR5.3	6	Os06g0552300
Un	TaBZR6	2	Os02g0129600
T. aestivum (AABBDD)		A. thaliana
Chromosome	Gene name	Chromosome	Gene ID
2A	TaBZR1.1	1	AT1G19350
2A	TaBZR1.1	4	AT4G36780
2A	TaBZR1.1	3	AT1G75080
2A	TaBZR1.1	3	AT3G50750
3A	TaBZR2.2	4	AT4G18890
6A	TaBZR4.1	5	AT5G45300
6A	TaBZR4.2	4	AT4G18890
7A	TaBZR5.1	4	AT4G18890
2B	TaBZR1.2	1	AT1G19350
2B	TaBZR1.2	4	AT4G36780
2B	TaBZR1.2	1	AT1G75080
2B	TaBZR1.2	3	AT3G50750
3B	TaBZR2.4	4	AT4G18890
4B	TaBZR3.1	2	AT2G45880
6B	TaBZR4.3	5	AT5G45300
6B	TaBZR4.4	4	AT4G18890
7B	TaBZR5.2	4	AT4G18890
2D	TaBZR1.3	1	AT1G19350
2D	TaBZR1.3	4	AT4G36780
2D	TaBZR1.3	1	AT1G75080
2D	TaBZR1.3	3	AT3G50750
3D	TaBZR2.6	4	AT4G18890
4D	TaBZR3.2	2	AT2G45880
6D	TaBZR4.5	4	AT4G18890
7D	TaBZR5.3	4	AT4G18890
Un	TaBZR6	5	AT5G45300
