# Supplementary material for: Genome-Wide Identification and Characterization of the Brassinazole-resistant (BZR) Gene Family and Its Expression in the Various Developmental Stage and Stress Conditions in Wheat (Triticum aestivum L.)
Source: Int J Mol Sci. 2021 Aug 14;22(16):8743. doi: 10.3390/ijms22168743 (PMC8395832; doi:10.3390/ijms22168743)
Supplement: Supplementary file 1 [file ijms-22-08743-s001.zip › Table S5.xls]

## Sheet: Sheet1
Table S5. Domain organization of TaBZR genes predicted using pfam with default parameters.
Protein name	aln start	aln-end	envelope start	envelope end	hmm-acc	hmm name	hmm start	hmm end	hmm length	bit score	evalue
TaBZR1.1	18	144	17	154	PF05687.13	BES1_N	2	128	152	204.94	7.7e-61
TaBZR1.2	18	144	17	154	PF05687.13	BES1_N	2	128	152	205.33	5.8e-61
TaBZR1.3	18	145	17	156	PF05687.13	BES1_N	2	129	152	205.62	4.8e-61
TaBZR2.1	58	134	56	175	PF05687.13	BES1_N	3	70	152	96.77	1.6e-27
TaBZR2.2	21	160	20	161	PF05687.13	BES1_N	2	151	152	215.28	5.1e-64
TaBZR2.3	57	130	55	172	PF05687.13	BES1_N	3	76	152	102.51	2.7e-29
TaBZR2.4	19	158	18	159	PF05687.13	BES1_N	2	151	152	215.29	5e-64
TaBZR2.5	55	144	53	173	PF05687.13	BES1_N	3	95	152	101.96	4e-29
TaBZR2.6	23	162	22	163	PF05687.13	BES1_N	2	151	152	215.26	5.1e-64
TaBZR3.1	131	536	122	537	PF01373.17	Glyco_hydro_14	12	401	402	383.46	1.2e-114
TaBZR3.1	48	122	47	147	PF05687.13	BES1_N	2	76	152	106.55	1.6e-30
TaBZR3.2	252	671	252	672	PF01373.17	Glyco_hydro_14	1	401	402	388.91	2.6e-116
TaBZR3.2	48	138	46	182	PF05687.13	BES1_N	3	93	152	107.2	9.8e-31
TaBZR4.1	235	607	223	623	PF01373.17	Glyco_hydro_14	14	378	402	273.6	2.7e-81
TaBZR4.1	44	193	42	195	PF05687.13	BES1_N	3	150	152	161.17	2.3e-47
TaBZR4.2	3	135	1	135	PF05687.13	BES1_N	3	152	152	171.59	1.4e-50
TaBZR4.3	235	607	223	625	PF01373.17	Glyco_hydro_14	14	378	402	271.02	1.6e-80
TaBZR4.3	44	193	42	195	PF05687.13	BES1_N	3	150	152	161.88	1.4e-47
TaBZR4.4	3	144	1	144	PF05687.13	BES1_N	3	152	152	184.15	1.9e-54
TaBZR4.5	3	137	1	137	PF05687.13	BES1_N	3	152	152	168.81	1e-49
TaBZR5.1	18	162	18	162	PF05687.13	BES1_N	1	152	152	227.2	1.1e-67
TaBZR5.2	18	162	18	162	PF05687.13	BES1_N	1	152	152	226.36	2e-67
TaBZR5.3	18	162	18	162	PF05687.13	BES1_N	1	152	152	227.98	6.2e-68
TaBZR6	235	607	223	623	PF01373.17	Glyco_hydro_14	14	378	402	274.02	2e-81
TaBZR6	44	193	42	195	PF05687.13	BES1_N	3	150	152	160.75	3.1e-47
