# Supplementary material for: Genome-Wide Identification and Characterization of the Brassinazole-resistant (BZR) Gene Family and Its Expression in the Various Developmental Stage and Stress Conditions in Wheat (Triticum aestivum L.)
Source: Int J Mol Sci. 2021 Aug 14;22(16):8743. doi: 10.3390/ijms22168743 (PMC8395832; doi:10.3390/ijms22168743)
Supplement: Supplementary file 1 [file ijms-22-08743-s001.zip › Table S6.xls]

## Sheet: Sheet1
Table S6. Cis-regulatory elements present in the TaBZR gene promoter region.
Gene ID	Cis-element	Sequence	Position	Length	Transcription direction	Species	Function
TaBZR1.1	MBS	CAACTG	94	6	+	Arabidopsis thaliana	MYB binding site involved in drought-inducibility
TaBZR1.1	MBS	CAACTG	1047	6	-	Arabidopsis thaliana	MYB binding site involved in drought-inducibility
TaBZR1.1	GC-motif	CCCCCG	58	6	+	Zea mays	enhancer-like element involved in anoxic specific inducibility
TaBZR1.1	GC-motif	CCCCCG	1406	6	+	Zea mays	enhancer-like element involved in anoxic specific inducibility
TaBZR1.1	GC-motif	CCCCCG	1466	6	-	Zea mays	enhancer-like element involved in anoxic specific inducibility
TaBZR1.1	TGACG-motif	TGACG	688	5	+	Hordeum vulgare	cis-acting regulatory element involved in the MeJA-responsiveness
TaBZR1.1	TGACG-motif	TGACG	1190	5	-	Hordeum vulgare	cis-acting regulatory element involved in the MeJA-responsiveness
TaBZR1.1	TGA-element	AACGAC	403	6	+	Brassica oleracea	auxin-responsive element
TaBZR1.1	LTR	CCGAAA	423	6	+	Hordeum vulgare	cis-acting element involved in low-temperature responsiveness
TaBZR1.1	Box 4	ATTAAT	1322	6	-	Petroselinum crispum	part of a conserved DNA module involved in light responsiveness
TaBZR1.1	G-box	TAACACGTAG	776	9	+	Brassica oleracea	cis-acting regulatory element involved in light responsiveness
TaBZR1.1	G-box	TACGTG	1668	6	-	Arabidopsis thaliana	cis-acting regulatory element involved in light responsiveness
TaBZR1.1	G-box	CACGAC	1850	6	+	Zea mays	cis-acting regulatory element involved in light responsiveness
TaBZR1.1	TCA-element	CCATCTTTTT	151	9	-	Nicotiana tabacum	cis-acting element involved in salicylic acid responsiveness
TaBZR1.1	G-Box	CACGTT	577	6	-	Pisum sativum	cis-acting regulatory element involved in light responsiveness
TaBZR1.1	Sp1	GGGCGG	173	6	-	Oryza sativa	light responsive element
TaBZR1.1	Sp1	GGGCGG	974	6	-	Oryza sativa	light responsive element
TaBZR1.1	CGTCA-motif	CGTCA	688	5	-	Hordeum vulgare	cis-acting regulatory element involved in the MeJA-responsiveness
TaBZR1.1	CGTCA-motif	CGTCA	1190	5	+	Hordeum vulgare	cis-acting regulatory element involved in the MeJA-responsiveness
TaBZR1.2	TGACG-motif	TGACG	383	5	-	Hordeum vulgare	cis-acting regulatory element involved in the MeJA-responsiveness
TaBZR1.2	TGACG-motif	TGACG	569	5	-	Hordeum vulgare	cis-acting regulatory element involved in the MeJA-responsiveness
TaBZR1.2	TGACG-motif	TGACG	633	5	-	Hordeum vulgare	cis-acting regulatory element involved in the MeJA-responsiveness
TaBZR1.2	TGACG-motif	TGACG	1133	5	-	Hordeum vulgare	cis-acting regulatory element involved in the MeJA-responsiveness
TaBZR1.2	TGACG-motif	TGACG	1245	5	+	Hordeum vulgare	cis-acting regulatory element involved in the MeJA-responsiveness
TaBZR1.2	Sp1	GGGCGG	90	6	-	Oryza sativa	light responsive element
TaBZR1.2	Sp1	GGGCGG	623	6	-	Oryza sativa	light responsive element
TaBZR1.2	Sp1	GGGCGG	664	6	-	Oryza sativa	light responsive element
TaBZR1.2	GC-motif	CCCCCG	418	6	-	Zea mays	enhancer-like element involved in anoxic specific inducibility
TaBZR1.2	I-box	GTATAAGGCC	20	9	-	Larix laricina	part of a light responsive element
TaBZR1.2	TATC-box	TATCCCA	1000	7	-	Oryza sativa	cis-acting element involved in gibberellin-responsiveness
TaBZR1.2	TGA-element	AACGAC	1650	6	-	Brassica oleracea	auxin-responsive element
TaBZR1.2	GCN4_motif	TGAGTCA	534	7	+	Oryza sativa	cis-regulatory element involved in endosperm expression
TaBZR1.2	G-box	CACGAC	1765	6	+	Zea mays	cis-acting regulatory element involved in light responsiveness
TaBZR1.2	C-box	ACGAGCACCGCC	436	11	+	Hordeum vulgare	cis-acting regulatory element involved in light responsiveness
TaBZR1.2	ABRE	AACCCGG	468	7	+	Arabidopsis thaliana	cis-acting element involved in the abscisic acid responsiveness
TaBZR1.2	O2-site	GATGATGTGG	101	9	-	Zea mays	cis-acting regulatory element involved in zein metabolism regulation
TaBZR1.2	CGTCA-motif	CGTCA	383	5	+	Hordeum vulgare	cis-acting regulatory element involved in the MeJA-responsiveness
TaBZR1.2	CGTCA-motif	CGTCA	569	5	+	Hordeum vulgare	cis-acting regulatory element involved in the MeJA-responsiveness
TaBZR1.2	CGTCA-motif	CGTCA	633	5	+	Hordeum vulgare	cis-acting regulatory element involved in the MeJA-responsiveness
TaBZR1.2	CGTCA-motif	CGTCA	1133	5	+	Hordeum vulgare	cis-acting regulatory element involved in the MeJA-responsiveness
TaBZR1.2	CGTCA-motif	CGTCA	1245	5	-	Hordeum vulgare	cis-acting regulatory element involved in the MeJA-responsiveness
TaBZR1.3	CAT-box	GCCACT	1926	6	+	Arabidopsis thaliana	cis-acting regulatory element related to meristem expression
TaBZR1.3	O2-site	GATGATGTGG	28	9	+	Zea mays	cis-acting regulatory element involved in zein metabolism regulation
TaBZR1.3	GARE-motif	TCTGTTG	147	7	+	Brassica oleracea	gibberellin-responsive element
TaBZR1.3	TGACG-motif	TGACG	493	5	+	Hordeum vulgare	cis-acting regulatory element involved in the MeJA-responsiveness
TaBZR1.3	TGACG-motif	TGACG	1037	5	-	Hordeum vulgare	cis-acting regulatory element involved in the MeJA-responsiveness
TaBZR1.3	ABRE	ACGTG	1510	5	-	Arabidopsis thaliana	cis-acting element involved in the abscisic acid responsiveness
TaBZR1.3	LTR	CCGAAA	74	6	+	Hordeum vulgare	cis-acting element involved in low-temperature responsiveness
TaBZR1.3	LTR	CCGAAA	135	6	-	Hordeum vulgare	cis-acting element involved in low-temperature responsiveness
TaBZR1.3	G-box	TACGTG	1510	6	-	Arabidopsis thaliana	cis-acting regulatory element involved in light responsiveness
TaBZR1.3	G-box	CACGAC	1663	6	+	Zea mays	cis-acting regulatory element involved in light responsiveness
TaBZR1.3	GT1-motif	GGTTAAT	397	7	+	Avena sativa	light responsive element
TaBZR1.3	GC-motif	CCCCCG	138	6	-	Zea mays	enhancer-like element involved in anoxic specific inducibility
TaBZR1.3	GC-motif	CCCCCG	1861	6	-	Zea mays	enhancer-like element involved in anoxic specific inducibility
TaBZR1.3	CGTCA-motif	CGTCA	493	5	-	Hordeum vulgare	cis-acting regulatory element involved in the MeJA-responsiveness
TaBZR1.3	CGTCA-motif	CGTCA	1037	5	+	Hordeum vulgare	cis-acting regulatory element involved in the MeJA-responsiveness
TaBZR2.1	TCA-element	CCATCTTTTT	891	9	-	Nicotiana tabacum	cis-acting element involved in salicylic acid responsiveness
TaBZR2.1	LTR	CCGAAA	1218	6	+	Hordeum vulgare	cis-acting element involved in low-temperature responsiveness
TaBZR2.1	LTR	CCGAAA	1898	6	+	Hordeum vulgare	cis-acting element involved in low-temperature responsiveness
TaBZR2.1	I-box	gGATAAGGTG	1530	9	-	Zea mays	part of a light responsive element
TaBZR2.1	Sp1	GGGCGG	750	6	+	Oryza sativa	light responsive element
TaBZR2.1	TCCC-motif	TCTCCCT	672	7	-	Spinacia oleracea	part of a light responsive element
TaBZR2.1	CAT-box	GCCACT	1365	6	+	Arabidopsis thaliana	cis-acting regulatory element related to meristem expression
TaBZR2.1	CAT-box	GCCACT	1549	6	+	Arabidopsis thaliana	cis-acting regulatory element related to meristem expression
TaBZR2.1	ABRE	ACGTG	1035	5	+	Arabidopsis thaliana	cis-acting element involved in the abscisic acid responsiveness
TaBZR2.1	ABRE	ACGTG	1192	5	+	Arabidopsis thaliana	cis-acting element involved in the abscisic acid responsiveness
TaBZR2.1	ABRE	ACGTG	1507	5	+	Arabidopsis thaliana	cis-acting element involved in the abscisic acid responsiveness
TaBZR2.1	ABRE	GACACGTGGC	1757	9	+	Triticum aestivum	cis-acting element involved in the abscisic acid responsiveness
TaBZR2.1	TGACG-motif	TGACG	143	5	+	Hordeum vulgare	cis-acting regulatory element involved in the MeJA-responsiveness
TaBZR2.1	GT1-motif	GGTTAA	1450	6	-	Arabidopsis thaliana	light responsive element
TaBZR2.1	GT1-motif	GGTTAA	1733	6	-	Arabidopsis thaliana	light responsive element
TaBZR2.1	G-box	GCCACGTGGA	792	9	+	Arabidopsis thaliana	cis-acting regulatory element involved in light responsiveness
TaBZR2.1	G-box	TACGTG	1034	6	+	Arabidopsis thaliana	cis-acting regulatory element involved in light responsiveness
TaBZR2.1	G-box	TACGTG	1191	6	+	Arabidopsis thaliana	cis-acting regulatory element involved in light responsiveness
TaBZR2.1	G-box	TACGTG	1506	6	+	Arabidopsis thaliana	cis-acting regulatory element involved in light responsiveness
TaBZR2.1	O2-site	GTTGACGTGA	518	9	-	Zea mays	cis-acting regulatory element involved in zein metabolism regulation
TaBZR2.1	ARE	AAACCA	360	6	+	Zea mays	cis-acting regulatory element essential for the anaerobic induction
TaBZR2.1	ARE	AAACCA	1023	6	+	Zea mays	cis-acting regulatory element essential for the anaerobic induction
TaBZR2.1	P-box	CCTTTTG	1641	7	+	Oryza sativa	gibberellin-responsive element
TaBZR2.1	CGTCA-motif	CGTCA	143	5	-	Hordeum vulgare	cis-acting regulatory element involved in the MeJA-responsiveness
TaBZR2.1	RY-element	CATGCATG	1461	8	-	Helianthus annuus	cis-acting regulatory element involved in seed-specific regulation
TaBZR2.2	G-box	CACGAC	145	6	+	Zea mays	cis-acting regulatory element involved in light responsiveness
TaBZR2.2	G-box	CACGTC	174	6	+	Zea mays	cis-acting regulatory element involved in light responsiveness
TaBZR2.2	G-box	CACGAC	401	6	+	Zea mays	cis-acting regulatory element involved in light responsiveness
TaBZR2.2	G-box	CACGAC	463	6	-	Zea mays	cis-acting regulatory element involved in light responsiveness
TaBZR2.2	G-box	CACGAC	488	6	+	Zea mays	cis-acting regulatory element involved in light responsiveness
TaBZR2.2	G-box	CACGAC	573	6	-	Zea mays	cis-acting regulatory element involved in light responsiveness
TaBZR2.2	G-box	TACGTG	614	6	+	Arabidopsis thaliana	cis-acting regulatory element involved in light responsiveness
TaBZR2.2	G-box	CACGAC	649	6	+	Zea mays	cis-acting regulatory element involved in light responsiveness
TaBZR2.2	G-box	TACGTG	662	6	+	Arabidopsis thaliana	cis-acting regulatory element involved in light responsiveness
TaBZR2.2	G-box	CACGTG	1737	6	-	Arabidopsis thaliana	cis-acting regulatory element involved in light responsiveness
TaBZR2.2	G-box	CACGAC	1775	6	+	Zea mays	cis-acting regulatory element involved in light responsiveness
TaBZR2.2	G-box	CACGTG	1816	6	-	Arabidopsis thaliana	cis-acting regulatory element involved in light responsiveness
TaBZR2.2	G-box	CACGTC	1833	6	-	Zea mays	cis-acting regulatory element involved in light responsiveness
TaBZR2.2	Sp1	GGGCGG	1668	6	+	Oryza sativa	light responsive element
TaBZR2.2	Sp1	GGGCGG	1764	6	-	Oryza sativa	light responsive element
TaBZR2.2	Sp1	GGGCGG	1992	6	+	Oryza sativa	light responsive element
TaBZR2.2	GTGGC-motif	CATCGTGTGGC	334	10	+	Arabidopsis thaliana	part of a light responsive element
TaBZR2.2	chs-CMA2a	TCACTTGA	1109	8	-	Petroselinum crispum	part of a light responsive element
TaBZR2.2	TGACG-motif	TGACG	472	5	+	Hordeum vulgare	cis-acting regulatory element involved in the MeJA-responsiveness
TaBZR2.2	TGACG-motif	TGACG	475	5	-	Hordeum vulgare	cis-acting regulatory element involved in the MeJA-responsiveness
TaBZR2.2	TGACG-motif	TGACG	1734	5	-	Hordeum vulgare	cis-acting regulatory element involved in the MeJA-responsiveness
TaBZR2.2	TGACG-motif	TGACG	1832	5	+	Hordeum vulgare	cis-acting regulatory element involved in the MeJA-responsiveness
TaBZR2.2	O2-site	GTTGACGTGA	472	9	-	Zea mays	cis-acting regulatory element involved in zein metabolism regulation
TaBZR2.2	O2-site	GATGATGTGG	731	9	+	Zea mays	cis-acting regulatory element involved in zein metabolism regulation
TaBZR2.2	O2-site	GTTGACGTGA	1830	9	+	Zea mays	cis-acting regulatory element involved in zein metabolism regulation
TaBZR2.2	GARE-motif	TCTGTTG	254	7	+	Brassica oleracea	gibberellin-responsive element
TaBZR2.2	LTR	CCGAAA	10	6	-	Hordeum vulgare	cis-acting element involved in low-temperature responsiveness
TaBZR2.2	LTR	CCGAAA	1717	6	+	Hordeum vulgare	cis-acting element involved in low-temperature responsiveness
TaBZR2.2	ABRE	ACGTG	174	5	-	Arabidopsis thaliana	cis-acting element involved in the abscisic acid responsiveness
TaBZR2.2	ABRE	ACGTG	615	5	+	Arabidopsis thaliana	cis-acting element involved in the abscisic acid responsiveness
TaBZR2.2	ABRE	ACGTG	663	5	+	Arabidopsis thaliana	cis-acting element involved in the abscisic acid responsiveness
TaBZR2.2	ABRE	ACGTG	760	5	+	Arabidopsis thaliana	cis-acting element involved in the abscisic acid responsiveness
TaBZR2.2	ABRE	GACACGTGGC	1462	9	-	Triticum aestivum	cis-acting element involved in the abscisic acid responsiveness
TaBZR2.2	ABRE	ACGTG	1464	5	-	Arabidopsis thaliana	cis-acting element involved in the abscisic acid responsiveness
TaBZR2.2	ABRE	CACGTG	1737	6	-	Arabidopsis thaliana	cis-acting element involved in the abscisic acid responsiveness
TaBZR2.2	ABRE	ACGTG	1738	5	+	Arabidopsis thaliana	cis-acting element involved in the abscisic acid responsiveness
TaBZR2.2	ABRE	CACGTG	1816	6	-	Arabidopsis thaliana	cis-acting element involved in the abscisic acid responsiveness
TaBZR2.2	ABRE	ACGTG	1817	5	+	Arabidopsis thaliana	cis-acting element involved in the abscisic acid responsiveness
TaBZR2.2	ABRE	ACGTG	1834	5	+	Arabidopsis thaliana	cis-acting element involved in the abscisic acid responsiveness
TaBZR2.2	G-Box	CACGTT	759	6	-	Pisum sativum	cis-acting regulatory element involved in light responsiveness
TaBZR2.2	G-Box	CACGTT	1464	6	+	Pisum sativum	cis-acting regulatory element involved in light responsiveness
TaBZR2.2	G-Box	CACGTG	1737	6	-	Pisum sativum	cis-acting regulatory element involved in light responsiveness
TaBZR2.2	G-Box	CACGTG	1816	6	-	Pisum sativum	cis-acting regulatory element involved in light responsiveness
TaBZR2.2	GC-motif	CCCCCG	227	6	+	Zea mays	enhancer-like element involved in anoxic specific inducibility
TaBZR2.2	GC-motif	CCCCCG	1512	6	+	Zea mays	enhancer-like element involved in anoxic specific inducibility
TaBZR2.2	GC-motif	CCCCCG	1583	6	+	Zea mays	enhancer-like element involved in anoxic specific inducibility
TaBZR2.2	GC-motif	CCCCCG	1889	6	+	Zea mays	enhancer-like element involved in anoxic specific inducibility
TaBZR2.2	GT1-motif	GGTTAAT	14	7	+	Avena sativa	light responsive element
TaBZR2.2	AuxRR-core	GGTCCAT	944	7	+	Nicotiana tabacum	cis-acting regulatory element involved in auxin responsiveness
TaBZR2.2	ARE	AAACCA	1635	6	+	Zea mays	cis-acting regulatory element essential for the anaerobic induction
TaBZR2.2	CGTCA-motif	CGTCA	472	5	-	Hordeum vulgare	cis-acting regulatory element involved in the MeJA-responsiveness
TaBZR2.2	CGTCA-motif	CGTCA	475	5	+	Hordeum vulgare	cis-acting regulatory element involved in the MeJA-responsiveness
TaBZR2.2	CGTCA-motif	CGTCA	1734	5	+	Hordeum vulgare	cis-acting regulatory element involved in the MeJA-responsiveness
TaBZR2.2	CGTCA-motif	CGTCA	1832	5	-	Hordeum vulgare	cis-acting regulatory element involved in the MeJA-responsiveness
TaBZR2.2	ATC-motif	TGCTATCCA	763	9	+	Pisum sativum	part of a conserved DNA module involved in light responsiveness
TaBZR2.3	TGACG-motif	TGACG	425	5	-	Hordeum vulgare	cis-acting regulatory element involved in the MeJA-responsiveness
TaBZR2.3	P-box	CCTTTTG	757	7	+	Oryza sativa	gibberellin-responsive element
TaBZR2.3	LTR	CCGAAA	233	6	+	Hordeum vulgare	cis-acting element involved in low-temperature responsiveness
TaBZR2.3	LTR	CCGAAA	505	6	-	Hordeum vulgare	cis-acting element involved in low-temperature responsiveness
TaBZR2.3	LTR	CCGAAA	1098	6	+	Hordeum vulgare	cis-acting element involved in low-temperature responsiveness
TaBZR2.3	LTR	CCGAAA	1372	6	-	Hordeum vulgare	cis-acting element involved in low-temperature responsiveness
TaBZR2.3	CGTCA-motif	CGTCA	425	5	+	Hordeum vulgare	cis-acting regulatory element involved in the MeJA-responsiveness
TaBZR2.3	MYB-like sequence	TAACCA	570	6	-	Arabidopsis thaliana
TaBZR2.3	GT1-motif	GGTTAA	341	6	+	Arabidopsis thaliana	light responsive element
TaBZR2.3	GT1-motif	GGTTAA	571	6	+	Arabidopsis thaliana	light responsive element
TaBZR2.3	GT1-motif	GGTTAA	1592	6	-	Arabidopsis thaliana	light responsive element
TaBZR2.3	ACE	GACACGTATG	311	9	-	Petroselinum crispum	cis-acting element involved in light responsiveness
TaBZR2.3	ABRE	ACGTG	77	5	-	Arabidopsis thaliana	cis-acting element involved in the abscisic acid responsiveness
TaBZR2.3	ABRE	ACGTG	314	5	+	Arabidopsis thaliana	cis-acting element involved in the abscisic acid responsiveness
TaBZR2.3	ABRE	ACGTG	1649	5	+	Arabidopsis thaliana	cis-acting element involved in the abscisic acid responsiveness
TaBZR2.3	CAT-box	GCCACT	318	6	+	Arabidopsis thaliana	cis-acting regulatory element related to meristem expression
TaBZR2.3	CAT-box	GCCACT	358	6	-	Arabidopsis thaliana	cis-acting regulatory element related to meristem expression
TaBZR2.3	CAT-box	GCCACT	387	6	-	Arabidopsis thaliana	cis-acting regulatory element related to meristem expression
TaBZR2.3	CAAT-box	CAAAT	19	5	-	Pisum sativum	common cis-acting element in promoter and enhancer regions
TaBZR2.3	Box 4	ATTAAT	416	6	+	Petroselinum crispum	part of a conserved DNA module involved in light responsiveness
TaBZR2.3	TCA-element	CCATCTTTTT	129	9	-	Nicotiana tabacum	cis-acting element involved in salicylic acid responsiveness
TaBZR2.3	TCA-element	CCATCTTTTT	362	9	+	Nicotiana tabacum	cis-acting element involved in salicylic acid responsiveness
TaBZR2.3	G-box	TACGTG	77	6	-	Arabidopsis thaliana	cis-acting regulatory element involved in light responsiveness
TaBZR2.3	G-box	TACGTG	313	6	+	Arabidopsis thaliana	cis-acting regulatory element involved in light responsiveness
TaBZR2.3	G-box	TACGTG	1648	6	+	Arabidopsis thaliana	cis-acting regulatory element involved in light responsiveness
TaBZR2.3	GATA-motif	GATAGGA	1422	7	+	Arabidopsis thaliana	part of a light responsive element
TaBZR2.3	RY-element	CATGCATG	671	8	+	Helianthus annuus	cis-acting regulatory element involved in seed-specific regulation
TaBZR2.3	RY-element	CATGCATG	675	8	+	Helianthus annuus	cis-acting regulatory element involved in seed-specific regulation
TaBZR2.3	RY-element	CATGCATG	840	8	+	Helianthus annuus	cis-acting regulatory element involved in seed-specific regulation
TaBZR2.3	RY-element	CATGCATG	844	8	+	Helianthus annuus	cis-acting regulatory element involved in seed-specific regulation
TaBZR2.3	RY-element	CATGCATG	848	8	+	Helianthus annuus	cis-acting regulatory element involved in seed-specific regulation
TaBZR2.3	RY-element	CATGCATG	1066	8	-	Helianthus annuus	cis-acting regulatory element involved in seed-specific regulation
TaBZR2.3	RY-element	CATGCATG	1603	8	-	Helianthus annuus	cis-acting regulatory element involved in seed-specific regulation
TaBZR2.3	I-box	gGATAAGGTG	1672	9	-	Zea mays	part of a light responsive element
TaBZR2.4	LTR	CCGAAA	1	6	-	Hordeum vulgare	cis-acting element involved in low-temperature responsiveness
TaBZR2.4	LTR	CCGAAA	1059	6	+	Hordeum vulgare	cis-acting element involved in low-temperature responsiveness
TaBZR2.4	LTR	CCGAAA	1682	6	+	Hordeum vulgare	cis-acting element involved in low-temperature responsiveness
TaBZR2.4	CGTCA-motif	CGTCA	1699	5	+	Hordeum vulgare	cis-acting regulatory element involved in the MeJA-responsiveness
TaBZR2.4	CGTCA-motif	CGTCA	1803	5	-	Hordeum vulgare	cis-acting regulatory element involved in the MeJA-responsiveness
TaBZR2.4	MRE	AACCTAA	865	7	-	Petroselinum crispum	MYB binding site involved in light responsiveness
TaBZR2.4	A-box	CCGTCC	1377	6	+	Petroselinum crispum	cis-acting regulatory element
TaBZR2.4	A-box	CCGTCC	1738	6	+	Petroselinum crispum	cis-acting regulatory element
TaBZR2.4	G-box	CACGTC	158	6	+	Zea mays	cis-acting regulatory element involved in light responsiveness
TaBZR2.4	G-box	CACGTG	1702	6	-	Arabidopsis thaliana	cis-acting regulatory element involved in light responsiveness
TaBZR2.4	G-box	CACGAC	1745	6	+	Zea mays	cis-acting regulatory element involved in light responsiveness
TaBZR2.4	G-box	CACGTG	1786	6	-	Arabidopsis thaliana	cis-acting regulatory element involved in light responsiveness
TaBZR2.4	G-box	CACGTC	1804	6	-	Zea mays	cis-acting regulatory element involved in light responsiveness
TaBZR2.4	O2-site	GATGACATGG	257	9	+	Zea mays	cis-acting regulatory element involved in zein metabolism regulation
TaBZR2.4	O2-site	GATGACATGG	424	9	-	Zea mays	cis-acting regulatory element involved in zein metabolism regulation
TaBZR2.4	ARE	AAACCA	1623	6	+	Zea mays	cis-acting regulatory element essential for the anaerobic induction
TaBZR2.4	ATCT-motif	AATCTAATCC	943	9	-	Pisum sativum	part of a conserved DNA module involved in light responsiveness
TaBZR2.4	GC-motif	CCCCCG	1488	6	+	Zea mays	enhancer-like element involved in anoxic specific inducibility
TaBZR2.4	GC-motif	CCCCCG	1568	6	+	Zea mays	enhancer-like element involved in anoxic specific inducibility
TaBZR2.4	GC-motif	CCCCCG	1815	6	+	Zea mays	enhancer-like element involved in anoxic specific inducibility
TaBZR2.4	GC-motif	CCCCCG	1861	6	+	Zea mays	enhancer-like element involved in anoxic specific inducibility
TaBZR2.4	TGACG-motif	TGACG	1699	5	-	Hordeum vulgare	cis-acting regulatory element involved in the MeJA-responsiveness
TaBZR2.4	TGACG-motif	TGACG	1803	5	+	Hordeum vulgare	cis-acting regulatory element involved in the MeJA-responsiveness
TaBZR2.4	ABRE	ACGTG	158	5	-	Arabidopsis thaliana	cis-acting element involved in the abscisic acid responsiveness
TaBZR2.4	ABRE	GACACGTGGC	1438	9	-	Triticum aestivum	cis-acting element involved in the abscisic acid responsiveness
TaBZR2.4	ABRE	ACGTG	1440	5	-	Arabidopsis thaliana	cis-acting element involved in the abscisic acid responsiveness
TaBZR2.4	ABRE	CACGTG	1702	6	-	Arabidopsis thaliana	cis-acting element involved in the abscisic acid responsiveness
TaBZR2.4	ABRE	ACGTG	1703	5	+	Arabidopsis thaliana	cis-acting element involved in the abscisic acid responsiveness
TaBZR2.4	ABRE	CACGTG	1786	6	-	Arabidopsis thaliana	cis-acting element involved in the abscisic acid responsiveness
TaBZR2.4	ABRE	ACGTG	1787	5	+	Arabidopsis thaliana	cis-acting element involved in the abscisic acid responsiveness
TaBZR2.4	ABRE	ACGTG	1805	5	+	Arabidopsis thaliana	cis-acting element involved in the abscisic acid responsiveness
TaBZR2.4	Sp1	GGGCGG	733	6	+	Oryza sativa	light responsive element
TaBZR2.4	Sp1	GGGCGG	1571	6	-	Oryza sativa	light responsive element
TaBZR2.4	Sp1	GGGCGG	1648	6	+	Oryza sativa	light responsive element
TaBZR2.4	Sp1	GGGCGG	1730	6	-	Oryza sativa	light responsive element
TaBZR2.4	Sp1	GGGCGG	1734	6	-	Oryza sativa	light responsive element
TaBZR2.4	Sp1	GGGCGG	1812	6	-	Oryza sativa	light responsive element
TaBZR2.4	Sp1	GGGCGG	1864	6	-	Oryza sativa	light responsive element
TaBZR2.4	Sp1	GGGCGG	1991	6	+	Oryza sativa	light responsive element
TaBZR2.4	G-Box	CACGTT	1440	6	+	Pisum sativum	cis-acting regulatory element involved in light responsiveness
TaBZR2.4	G-Box	CACGTG	1702	6	-	Pisum sativum	cis-acting regulatory element involved in light responsiveness
TaBZR2.4	G-Box	CACGTG	1786	6	-	Pisum sativum	cis-acting regulatory element involved in light responsiveness
TaBZR2.4	GT1-motif	GGTTAAT	209	7	+	Avena sativa	light responsive element
TaBZR2.4	GA-motif	ATAGATAA	135	8	+	Arabidopsis thaliana	part of a light responsive element
TaBZR2.5	LTR	CCGAAA	311	6	+	Hordeum vulgare	cis-acting element involved in low-temperature responsiveness
TaBZR2.5	LTR	CCGAAA	547	6	-	Hordeum vulgare	cis-acting element involved in low-temperature responsiveness
TaBZR2.5	LTR	CCGAAA	1070	6	+	Hordeum vulgare	cis-acting element involved in low-temperature responsiveness
TaBZR2.5	GT1-motif	GGTTAA	412	6	+	Arabidopsis thaliana	light responsive element
TaBZR2.5	GT1-motif	GGTTAAT	458	7	-	Avena sativa	light responsive element
TaBZR2.5	GT1-motif	GGTTAA	459	6	-	Arabidopsis thaliana	light responsive element
TaBZR2.5	GT1-motif	GGTTAA	613	6	+	Arabidopsis thaliana	light responsive element
TaBZR2.5	GT1-motif	GGTTAA	918	6	-	Arabidopsis thaliana	light responsive element
TaBZR2.5	GT1-motif	GGTTAA	1299	6	-	Arabidopsis thaliana	light responsive element
TaBZR2.5	GARE-motif	TCTGTTG	1624	7	+	Brassica oleracea	gibberellin-responsive element
TaBZR2.5	AE-box	AGAAACTT	912	8	+	Arabidopsis thaliana	part of a module for light response
TaBZR2.5	I-box	gGATAAGGTG	1383	9	-	Zea mays	part of a light responsive element
TaBZR2.5	Sp1	GGGCGG	32	6	+	Oryza sativa	light responsive element
TaBZR2.5	Sp1	GGGCGG	103	6	+	Oryza sativa	light responsive element
TaBZR2.5	Sp1	GGGCGG	1612	6	-	Oryza sativa	light responsive element
TaBZR2.5	ACE	GACACGTATG	389	9	-	Petroselinum crispum	cis-acting element involved in light responsiveness
TaBZR2.5	CAT-box	GCCACT	71	6	+	Arabidopsis thaliana	cis-acting regulatory element related to meristem expression
TaBZR2.5	CAT-box	GCCACT	396	6	+	Arabidopsis thaliana	cis-acting regulatory element related to meristem expression
TaBZR2.5	CAT-box	GCCACT	429	6	-	Arabidopsis thaliana	cis-acting regulatory element related to meristem expression
TaBZR2.5	CAT-box	GCCACT	1209	6	+	Arabidopsis thaliana	cis-acting regulatory element related to meristem expression
TaBZR2.5	GA-motif	ATAGATAA	1125	8	+	Arabidopsis thaliana	part of a light responsive element
TaBZR2.5	RY-element	CATGCATG	717	8	+	Helianthus annuus	cis-acting regulatory element involved in seed-specific regulation
TaBZR2.5	RY-element	CATGCATG	721	8	+	Helianthus annuus	cis-acting regulatory element involved in seed-specific regulation
TaBZR2.5	RY-element	CATGCATG	725	8	+	Helianthus annuus	cis-acting regulatory element involved in seed-specific regulation
TaBZR2.5	RY-element	CATGCATG	729	8	+	Helianthus annuus	cis-acting regulatory element involved in seed-specific regulation
TaBZR2.5	RY-element	CATGCATG	893	8	+	Helianthus annuus	cis-acting regulatory element involved in seed-specific regulation
TaBZR2.5	RY-element	CATGCATG	897	8	+	Helianthus annuus	cis-acting regulatory element involved in seed-specific regulation
TaBZR2.5	RY-element	CATGCATG	901	8	+	Helianthus annuus	cis-acting regulatory element involved in seed-specific regulation
TaBZR2.5	RY-element	CATGCATG	1310	8	-	Helianthus annuus	cis-acting regulatory element involved in seed-specific regulation
TaBZR2.5	RY-element	CATGCATG	1314	8	-	Helianthus annuus	cis-acting regulatory element involved in seed-specific regulation
TaBZR2.5	P-box	CCTTTTG	812	7	+	Oryza sativa	gibberellin-responsive element
TaBZR2.5	P-box	CCTTTTG	1717	7	+	Oryza sativa	gibberellin-responsive element
TaBZR2.5	TCA-element	CCATCTTTTT	1951	9	-	Nicotiana tabacum	cis-acting element involved in salicylic acid responsiveness
TaBZR2.5	TGACG-motif	TGACG	467	5	-	Hordeum vulgare	cis-acting regulatory element involved in the MeJA-responsiveness
TaBZR2.5	CGTCA-motif	CGTCA	467	5	+	Hordeum vulgare	cis-acting regulatory element involved in the MeJA-responsiveness
TaBZR2.5	ABRE	ACGTG	154	5	-	Arabidopsis thaliana	cis-acting element involved in the abscisic acid responsiveness
TaBZR2.5	ABRE	ACGTG	392	5	+	Arabidopsis thaliana	cis-acting element involved in the abscisic acid responsiveness
TaBZR2.5	ABRE	ACGTG	1594	5	+	Arabidopsis thaliana	cis-acting element involved in the abscisic acid responsiveness
TaBZR2.5	G-box	TACGTG	154	6	-	Arabidopsis thaliana	cis-acting regulatory element involved in light responsiveness
TaBZR2.5	G-box	TACGTG	391	6	+	Arabidopsis thaliana	cis-acting regulatory element involved in light responsiveness
TaBZR2.5	G-box	CACGTC	1593	6	-	Zea mays	cis-acting regulatory element involved in light responsiveness
TaBZR2.6	TCT-motif	TCTTAC	356	6	-	Arabidopsis thaliana	part of a light responsive element
TaBZR2.6	TGACG-motif	TGACG	1714	5	-	Hordeum vulgare	cis-acting regulatory element involved in the MeJA-responsiveness
TaBZR2.6	TGACG-motif	TGACG	1802	5	+	Hordeum vulgare	cis-acting regulatory element involved in the MeJA-responsiveness
TaBZR2.6	TGA-element	AACGAC	796	6	-	Brassica oleracea	auxin-responsive element
TaBZR2.6	CGTCA-motif	CGTCA	1714	5	+	Hordeum vulgare	cis-acting regulatory element involved in the MeJA-responsiveness
TaBZR2.6	CGTCA-motif	CGTCA	1802	5	-	Hordeum vulgare	cis-acting regulatory element involved in the MeJA-responsiveness
TaBZR2.6	G-Box	CACGTT	495	6	-	Pisum sativum	cis-acting regulatory element involved in light responsiveness
TaBZR2.6	G-Box	CACGTG	1717	6	-	Pisum sativum	cis-acting regulatory element involved in light responsiveness
TaBZR2.6	G-Box	CACGTG	1785	6	-	Pisum sativum	cis-acting regulatory element involved in light responsiveness
TaBZR2.6	G-box	TAAACGTG	493	8	+	Brassica oleracea	cis-acting regulatory element involved in light responsiveness
TaBZR2.6	G-box	CACGTG	1717	6	-	Arabidopsis thaliana	cis-acting regulatory element involved in light responsiveness
TaBZR2.6	G-box	CACGTG	1785	6	-	Arabidopsis thaliana	cis-acting regulatory element involved in light responsiveness
TaBZR2.6	G-box	CACGTC	1803	6	-	Zea mays	cis-acting regulatory element involved in light responsiveness
TaBZR2.6	ARE	AAACCA	228	6	-	Zea mays	cis-acting regulatory element essential for the anaerobic induction
TaBZR2.6	ARE	AAACCA	907	6	+	Zea mays	cis-acting regulatory element essential for the anaerobic induction
TaBZR2.6	ARE	AAACCA	1624	6	+	Zea mays	cis-acting regulatory element essential for the anaerobic induction
TaBZR2.6	GC-motif	CCCCCG	1569	6	+	Zea mays	enhancer-like element involved in anoxic specific inducibility
TaBZR2.6	Sp1	GGGCGG	1649	6	+	Oryza sativa	light responsive element
TaBZR2.6	Sp1	GGGCGG	1745	6	-	Oryza sativa	light responsive element
TaBZR2.6	Sp1	GGGCGG	1749	6	-	Oryza sativa	light responsive element
TaBZR2.6	Sp1	GGGCGG	1946	6	-	Oryza sativa	light responsive element
TaBZR2.6	Sp1	GGGCGG	1990	6	+	Oryza sativa	light responsive element
TaBZR2.6	GARE-motif	TCTGTTG	460	7	+	Brassica oleracea	gibberellin-responsive element
TaBZR2.6	GATA-motif	GATAGGA	704	7	-	Arabidopsis thaliana	part of a light responsive element
TaBZR2.6	AE-box	AGAAACAA	819	8	-	Arabidopsis thaliana	part of a module for light response
TaBZR2.6	TCA-element	CCATCTTTTT	628	9	-	Nicotiana tabacum	cis-acting element involved in salicylic acid responsiveness
TaBZR2.6	ABRE	ACGTG	496	5	+	Arabidopsis thaliana	cis-acting element involved in the abscisic acid responsiveness
TaBZR2.6	ABRE	CACGTG	1717	6	-	Arabidopsis thaliana	cis-acting element involved in the abscisic acid responsiveness
TaBZR2.6	ABRE	ACGTG	1718	5	+	Arabidopsis thaliana	cis-acting element involved in the abscisic acid responsiveness
TaBZR2.6	ABRE	CACGTG	1785	6	-	Arabidopsis thaliana	cis-acting element involved in the abscisic acid responsiveness
TaBZR2.6	ABRE	ACGTG	1786	5	+	Arabidopsis thaliana	cis-acting element involved in the abscisic acid responsiveness
TaBZR2.6	ABRE	ACGTG	1804	5	+	Arabidopsis thaliana	cis-acting element involved in the abscisic acid responsiveness
TaBZR2.6	LTR	CCGAAA	1697	6	+	Hordeum vulgare	cis-acting element involved in low-temperature responsiveness
TaBZR3.1	GATA-motif	AAGATAAGATT	1030	10	-	Arabidopsis thaliana	part of a light responsive element
TaBZR3.1	G-box	CACGAC	231	6	-	Zea mays	cis-acting regulatory element involved in light responsiveness
TaBZR3.1	G-box	TACGTG	539	6	-	Arabidopsis thaliana	cis-acting regulatory element involved in light responsiveness
TaBZR3.1	G-box	TACGTG	1347	6	-	Arabidopsis thaliana	cis-acting regulatory element involved in light responsiveness
TaBZR3.1	G-box	CACGTG	1851	6	-	Arabidopsis thaliana	cis-acting regulatory element involved in light responsiveness
TaBZR3.1	G-box	ACACGTGT	1875	8	-	Brassica napus	cis-acting regulatory element involved in light responsiveness
TaBZR3.1	G-box	CACGTG	1876	6	-	Arabidopsis thaliana	cis-acting regulatory element involved in light responsiveness
TaBZR3.1	TGA-element	AACGAC	285	6	+	Brassica oleracea	auxin-responsive element
TaBZR3.1	I-box	gGATAAGGTG	996	9	+	Zea mays	part of a light responsive element
TaBZR3.1	GC-motif	CCCCCG	475	6	+	Zea mays	enhancer-like element involved in anoxic specific inducibility
TaBZR3.1	GC-motif	CCCCCG	1152	6	-	Zea mays	enhancer-like element involved in anoxic specific inducibility
TaBZR3.1	Sp1	GGGCGG	317	6	-	Oryza sativa	light responsive element
TaBZR3.1	Sp1	GGGCGG	1835	6	-	Oryza sativa	light responsive element
TaBZR3.1	Sp1	GGGCGG	1957	6	-	Oryza sativa	light responsive element
TaBZR3.1	TCA-element	CCATCTTTTT	486	9	+	Nicotiana tabacum	cis-acting element involved in salicylic acid responsiveness
TaBZR3.1	TGACG-motif	TGACG	697	5	+	Hordeum vulgare	cis-acting regulatory element involved in the MeJA-responsiveness
TaBZR3.1	TGACG-motif	TGACG	1756	5	+	Hordeum vulgare	cis-acting regulatory element involved in the MeJA-responsiveness
TaBZR3.1	CGTCA-motif	CGTCA	697	5	-	Hordeum vulgare	cis-acting regulatory element involved in the MeJA-responsiveness
TaBZR3.1	CGTCA-motif	CGTCA	1756	5	-	Hordeum vulgare	cis-acting regulatory element involved in the MeJA-responsiveness
TaBZR3.1	G-Box	CACGTT	578	6	+	Pisum sativum	cis-acting regulatory element involved in light responsiveness
TaBZR3.1	G-Box	CACGTG	1851	6	-	Pisum sativum	cis-acting regulatory element involved in light responsiveness
TaBZR3.1	G-Box	CACGTG	1876	6	-	Pisum sativum	cis-acting regulatory element involved in light responsiveness
TaBZR3.1	ABRE	ACGTG	539	5	-	Arabidopsis thaliana	cis-acting element involved in the abscisic acid responsiveness
TaBZR3.1	ABRE	ACGTG	578	5	-	Arabidopsis thaliana	cis-acting element involved in the abscisic acid responsiveness
TaBZR3.1	ABRE	TACGTGTC	1345	8	-	Oryza sativa	cis-acting element involved in the abscisic acid responsiveness
TaBZR3.1	ABRE	ACGTG	1347	5	-	Arabidopsis thaliana	cis-acting element involved in the abscisic acid responsiveness
TaBZR3.1	ABRE	CACGTG	1851	6	-	Arabidopsis thaliana	cis-acting element involved in the abscisic acid responsiveness
TaBZR3.1	ABRE	ACGTG	1852	5	+	Arabidopsis thaliana	cis-acting element involved in the abscisic acid responsiveness
TaBZR3.1	ABRE	CGCACGTGTC	1874	9	+	Hordeum vulgare	cis-acting element involved in the abscisic acid responsiveness
TaBZR3.1	ABRE	CACGTG	1876	6	-	Arabidopsis thaliana	cis-acting element involved in the abscisic acid responsiveness
TaBZR3.1	ABRE	ACGTG	1877	5	+	Arabidopsis thaliana	cis-acting element involved in the abscisic acid responsiveness
TaBZR3.1	ACE	GACACGTATG	537	9	+	Petroselinum crispum	cis-acting element involved in light responsiveness
TaBZR3.1	ACE	GACACGTATG	1345	10	+	Petroselinum crispum	cis-acting element involved in light responsiveness
TaBZR3.1	ACE	GACACGTATG	1874	9	-	Petroselinum crispum	cis-acting element involved in light responsiveness
TaBZR3.1	HD-Zip 1	CAAT(A/T)ATTG	425	8.5	+	Arabidopsis thaliana	element involved in differentiation of the palisade mesophyll cells
TaBZR3.1	CAT-box	GCCACT	897	6	+	Arabidopsis thaliana	cis-acting regulatory element related to meristem expression
TaBZR3.1	Box 4	ATTAAT	438	6	+	Petroselinum crispum	part of a conserved DNA module involved in light responsiveness
TaBZR3.1	Box 4	ATTAAT	531	6	+	Petroselinum crispum	part of a conserved DNA module involved in light responsiveness
TaBZR3.1	MBS	CAACTG	1327	6	-	Arabidopsis thaliana	MYB binding site involved in drought-inducibility
TaBZR3.1	ARE	AAACCA	1311	6	+	Zea mays	cis-acting regulatory element essential for the anaerobic induction
TaBZR3.1	P-box	CCTTTTG	183	7	+	Oryza sativa	gibberellin-responsive element
TaBZR3.2	ATCT-motif	AATCTAATCC	431	9	+	Pisum sativum	part of a conserved DNA module involved in light responsiveness
TaBZR3.2	ATCT-motif	AATCTAATCC	436	9	+	Pisum sativum	part of a conserved DNA module involved in light responsiveness
TaBZR3.2	ATCT-motif	AATCTAATCC	441	9	+	Pisum sativum	part of a conserved DNA module involved in light responsiveness
TaBZR3.2	ATCT-motif	AATCTAATCC	446	9	+	Pisum sativum	part of a conserved DNA module involved in light responsiveness
TaBZR3.2	ATCT-motif	AATCTAATCC	451	9	+	Pisum sativum	part of a conserved DNA module involved in light responsiveness
TaBZR3.2	ATCT-motif	AATCTAATCC	1723	9	-	Pisum sativum	part of a conserved DNA module involved in light responsiveness
TaBZR3.2	ATCT-motif	AATCTAATCC	1728	9	-	Pisum sativum	part of a conserved DNA module involved in light responsiveness
TaBZR3.2	MBS	CAACTG	86	6	-	Arabidopsis thaliana	MYB binding site involved in drought-inducibility
TaBZR3.2	MBS	CAACTG	1554	6	+	Arabidopsis thaliana	MYB binding site involved in drought-inducibility
TaBZR3.2	Sp1	GGGCGG	1802	6	-	Oryza sativa	light responsive element
TaBZR3.2	chs-CMA2a	TCACTTGA	922	8	-	Petroselinum crispum	part of a light responsive element
TaBZR3.2	chs-CMA2a	TCACTTGA	1420	8	-	Petroselinum crispum	part of a light responsive element
TaBZR3.2	TGACG-motif	TGACG	32	5	+	Hordeum vulgare	cis-acting regulatory element involved in the MeJA-responsiveness
TaBZR3.2	TGACG-motif	TGACG	152	5	-	Hordeum vulgare	cis-acting regulatory element involved in the MeJA-responsiveness
TaBZR3.2	TGACG-motif	TGACG	186	5	+	Hordeum vulgare	cis-acting regulatory element involved in the MeJA-responsiveness
TaBZR3.2	TGACG-motif	TGACG	806	5	+	Hordeum vulgare	cis-acting regulatory element involved in the MeJA-responsiveness
TaBZR3.2	GARE-motif	TCTGTTG	118	7	+	Brassica oleracea	gibberellin-responsive element
TaBZR3.2	ACE	GACACGTATG	1875	9	-	Petroselinum crispum	cis-acting element involved in light responsiveness
TaBZR3.2	TCT-motif	TCTTAC	1376	6	-	Arabidopsis thaliana	part of a light responsive element
TaBZR3.2	TCT-motif	TCTTAC	1496	6	-	Arabidopsis thaliana	part of a light responsive element
TaBZR3.2	CGTCA-motif	CGTCA	32	5	-	Hordeum vulgare	cis-acting regulatory element involved in the MeJA-responsiveness
TaBZR3.2	CGTCA-motif	CGTCA	152	5	+	Hordeum vulgare	cis-acting regulatory element involved in the MeJA-responsiveness
TaBZR3.2	CGTCA-motif	CGTCA	186	5	-	Hordeum vulgare	cis-acting regulatory element involved in the MeJA-responsiveness
TaBZR3.2	CGTCA-motif	CGTCA	806	5	-	Hordeum vulgare	cis-acting regulatory element involved in the MeJA-responsiveness
TaBZR3.2	ABRE	CACGTG	1818	6	-	Arabidopsis thaliana	cis-acting element involved in the abscisic acid responsiveness
TaBZR3.2	ABRE	ACGTG	1819	5	+	Arabidopsis thaliana	cis-acting element involved in the abscisic acid responsiveness
TaBZR3.2	ABRE	CGCACGTGTC	1875	9	+	Hordeum vulgare	cis-acting element involved in the abscisic acid responsiveness
TaBZR3.2	ABRE	CACGTG	1877	6	-	Arabidopsis thaliana	cis-acting element involved in the abscisic acid responsiveness
TaBZR3.2	ABRE	ACGTG	1878	5	+	Arabidopsis thaliana	cis-acting element involved in the abscisic acid responsiveness
TaBZR3.2	ABRE	AACCCGG	1912	7	+	Arabidopsis thaliana	cis-acting element involved in the abscisic acid responsiveness
TaBZR3.2	TCCC-motif	TCTCCCT	1169	7	+	Spinacia oleracea	part of a light responsive element
TaBZR3.2	L-box	ATCCCACCTAC	1218	10	+	Petroselinum crispum	part of a light responsive element
TaBZR3.2	CAT-box	GCCACT	42	6	+	Arabidopsis thaliana	cis-acting regulatory element related to meristem expression
TaBZR3.2	CAT-box	GCCACT	358	6	+	Arabidopsis thaliana	cis-acting regulatory element related to meristem expression
TaBZR3.2	CAT-box	GCCACT	610	6	+	Arabidopsis thaliana	cis-acting regulatory element related to meristem expression
TaBZR3.2	CAT-box	GCCACT	1404	6	+	Arabidopsis thaliana	cis-acting regulatory element related to meristem expression
TaBZR3.2	CAT-box	GCCACT	1560	6	+	Arabidopsis thaliana	cis-acting regulatory element related to meristem expression
TaBZR3.2	I-box	cCATATCCAAT	1013	10	-	Flaveria trinervia	part of a light responsive element
TaBZR3.2	I-box	cCATATCCAAT	1439	10	-	Flaveria trinervia	part of a light responsive element
TaBZR3.2	G-box	CACGTG	1818	6	-	Arabidopsis thaliana	cis-acting regulatory element involved in light responsiveness
TaBZR3.2	G-box	ACACGTGT	1876	8	-	Brassica napus	cis-acting regulatory element involved in light responsiveness
TaBZR3.2	G-box	CACGTG	1877	6	-	Arabidopsis thaliana	cis-acting regulatory element involved in light responsiveness
TaBZR3.2	CAAT-box	CCAAT	142	5	+	Arabidopsis thaliana	common cis-acting element in promoter and enhancer regions
TaBZR3.2	GT1-motif	GGTTAA	788	6	-	Arabidopsis thaliana	light responsive element
TaBZR3.2	A-box	CCGTCC	1863	6	+	Petroselinum crispum	cis-acting regulatory element
TaBZR3.2	G-Box	CACGTG	1818	6	-	Pisum sativum	cis-acting regulatory element involved in light responsiveness
TaBZR3.2	G-Box	CACGTG	1877	6	-	Pisum sativum	cis-acting regulatory element involved in light responsiveness
TaBZR3.2	ARE	AAACCA	278	6	+	Zea mays	cis-acting regulatory element essential for the anaerobic induction
TaBZR3.2	ARE	AAACCA	555	6	+	Zea mays	cis-acting regulatory element essential for the anaerobic induction
TaBZR3.2	ARE	AAACCA	1045	6	+	Zea mays	cis-acting regulatory element essential for the anaerobic induction
TaBZR3.2	ARE	AAACCA	1471	6	+	Zea mays	cis-acting regulatory element essential for the anaerobic induction
TaBZR3.2	AE-box	AGAAACTT	1284	8	+	Arabidopsis thaliana	part of a module for light response
TaBZR4.1	TCA-element	CCATCTTTTT	1057	9	-	Nicotiana tabacum	cis-acting element involved in salicylic acid responsiveness
TaBZR4.1	TGACG-motif	TGACG	423	5	-	Hordeum vulgare	cis-acting regulatory element involved in the MeJA-responsiveness
TaBZR4.1	TGACG-motif	TGACG	778	5	+	Hordeum vulgare	cis-acting regulatory element involved in the MeJA-responsiveness
TaBZR4.1	TGACG-motif	TGACG	1537	5	+	Hordeum vulgare	cis-acting regulatory element involved in the MeJA-responsiveness
TaBZR4.1	AuxRR-core	GGTCCAT	1486	7	-	Nicotiana tabacum	cis-acting regulatory element involved in auxin responsiveness
TaBZR4.1	CAT-box	GCCACT	1473	6	-	Arabidopsis thaliana	cis-acting regulatory element related to meristem expression
TaBZR4.1	CGTCA-motif	CGTCA	423	5	+	Hordeum vulgare	cis-acting regulatory element involved in the MeJA-responsiveness
TaBZR4.1	CGTCA-motif	CGTCA	778	5	-	Hordeum vulgare	cis-acting regulatory element involved in the MeJA-responsiveness
TaBZR4.1	CGTCA-motif	CGTCA	1537	5	-	Hordeum vulgare	cis-acting regulatory element involved in the MeJA-responsiveness
TaBZR4.1	MBS	CAACTG	1758	6	+	Arabidopsis thaliana	MYB binding site involved in drought-inducibility
TaBZR4.1	GATA-motif	GATAGGA	193	7	-	Arabidopsis thaliana	part of a light responsive element
TaBZR4.1	GATA-motif	AAGATAAGATT	459	10	+	Arabidopsis thaliana	part of a light responsive element
TaBZR4.1	TCT-motif	TCTTAC	1781	6	-	Arabidopsis thaliana	part of a light responsive element
TaBZR4.1	ATCT-motif	AATCTAATCC	1828	9	+	Pisum sativum	part of a conserved DNA module involved in light responsiveness
TaBZR4.1	O2-site	GATGATGTGG	444	9	-	Zea mays	cis-acting regulatory element involved in zein metabolism regulation
TaBZR4.1	O2-site	GATGATGTGG	1503	10	+	Zea mays	cis-acting regulatory element involved in zein metabolism regulation
TaBZR4.1	ABRE	ACGTG	357	5	-	Arabidopsis thaliana	cis-acting element involved in the abscisic acid responsiveness
TaBZR4.1	ARE	AAACCA	261	6	-	Zea mays	cis-acting regulatory element essential for the anaerobic induction
TaBZR4.1	ARE	AAACCA	638	6	+	Zea mays	cis-acting regulatory element essential for the anaerobic induction
TaBZR4.1	ARE	AAACCA	676	6	+	Zea mays	cis-acting regulatory element essential for the anaerobic induction
TaBZR4.1	ARE	AAACCA	860	6	-	Zea mays	cis-acting regulatory element essential for the anaerobic induction
TaBZR4.1	LTR	CCGAAA	70	6	+	Hordeum vulgare	cis-acting element involved in low-temperature responsiveness
TaBZR4.1	LTR	CCGAAA	1746	6	-	Hordeum vulgare	cis-acting element involved in low-temperature responsiveness
TaBZR4.1	G-box	CACGAC	183	6	+	Zea mays	cis-acting regulatory element involved in light responsiveness
TaBZR4.1	G-box	TACGTG	357	6	-	Arabidopsis thaliana	cis-acting regulatory element involved in light responsiveness
TaBZR4.2	AAAC-motif	CAATCAAAACCT	448	11	-	Spinacia oleracea	light responsive element
TaBZR4.2	G-box	CACGAC	630	6	+	Zea mays	cis-acting regulatory element involved in light responsiveness
TaBZR4.2	G-box	CAGACGTGGCA	800	10	-	Nicotiana plumbaginifolia	cis-acting regulatory element involved in light responsiveness
TaBZR4.2	G-box	CACGTC	803	6	+	Zea mays	cis-acting regulatory element involved in light responsiveness
TaBZR4.2	G-box	CACGTG	1775	6	-	Arabidopsis thaliana	cis-acting regulatory element involved in light responsiveness
TaBZR4.2	ABRE	ACGTG	803	5	-	Arabidopsis thaliana	cis-acting element involved in the abscisic acid responsiveness
TaBZR4.2	ABRE	ACGTG	1091	5	+	Arabidopsis thaliana	cis-acting element involved in the abscisic acid responsiveness
TaBZR4.2	ABRE	CGCACGTGTC	1773	9	+	Hordeum vulgare	cis-acting element involved in the abscisic acid responsiveness
TaBZR4.2	ABRE	CACGTG	1775	6	-	Arabidopsis thaliana	cis-acting element involved in the abscisic acid responsiveness
TaBZR4.2	ABRE	ACGTG	1776	5	+	Arabidopsis thaliana	cis-acting element involved in the abscisic acid responsiveness
TaBZR4.2	TCA-element	CCATCTTTTT	982	9	+	Nicotiana tabacum	cis-acting element involved in salicylic acid responsiveness
TaBZR4.2	TGA-box	TGACGTAA	312	8	+	Glycine max	part of an auxin-responsive element
TaBZR4.2	TGACG-motif	TGACG	312	5	+	Hordeum vulgare	cis-acting regulatory element involved in the MeJA-responsiveness
TaBZR4.2	TGACG-motif	TGACG	805	5	-	Hordeum vulgare	cis-acting regulatory element involved in the MeJA-responsiveness
TaBZR4.2	TGACG-motif	TGACG	850	5	-	Hordeum vulgare	cis-acting regulatory element involved in the MeJA-responsiveness
TaBZR4.2	CAT-box	GCCACT	482	6	-	Arabidopsis thaliana	cis-acting regulatory element related to meristem expression
TaBZR4.2	CAT-box	GCCACT	888	6	-	Arabidopsis thaliana	cis-acting regulatory element related to meristem expression
TaBZR4.2	CAT-box	GCCACT	1725	6	+	Arabidopsis thaliana	cis-acting regulatory element related to meristem expression
TaBZR4.2	RY-element	CATGCATG	210	8	+	Helianthus annuus	cis-acting regulatory element involved in seed-specific regulation
TaBZR4.2	RY-element	CATGCATG	260	8	+	Helianthus annuus	cis-acting regulatory element involved in seed-specific regulation
TaBZR4.2	Box 4	ATTAAT	1376	6	-	Petroselinum crispum	part of a conserved DNA module involved in light responsiveness
TaBZR4.2	ARE	AAACCA	19	6	-	Zea mays	cis-acting regulatory element essential for the anaerobic induction
TaBZR4.2	ARE	AAACCA	1597	6	+	Zea mays	cis-acting regulatory element essential for the anaerobic induction
TaBZR4.2	G-Box	TCCACATGGCA	1044	10	-	Triticum aestivum	cis-acting regulatory element involved in light responsiveness
TaBZR4.2	G-Box	CACGTT	1090	6	-	Pisum sativum	cis-acting regulatory element involved in light responsiveness
TaBZR4.2	G-Box	CACGTG	1775	6	-	Pisum sativum	cis-acting regulatory element involved in light responsiveness
TaBZR4.2	MBS	CAACTG	671	6	+	Arabidopsis thaliana	MYB binding site involved in drought-inducibility
TaBZR4.2	GATA-motif	GATAGGA	189	7	+	Arabidopsis thaliana	part of a light responsive element
TaBZR4.2	P-box	CCTTTTG	350	7	+	Oryza sativa	gibberellin-responsive element
TaBZR4.2	CGTCA-motif	CGTCA	312	5	-	Hordeum vulgare	cis-acting regulatory element involved in the MeJA-responsiveness
TaBZR4.2	CGTCA-motif	CGTCA	805	5	+	Hordeum vulgare	cis-acting regulatory element involved in the MeJA-responsiveness
TaBZR4.2	CGTCA-motif	CGTCA	850	5	+	Hordeum vulgare	cis-acting regulatory element involved in the MeJA-responsiveness
TaBZR4.3	GT1-motif	GGTTAAT	319	7	-	Avena sativa	light responsive element
TaBZR4.3	GT1-motif	GGTTAA	320	6	-	Arabidopsis thaliana	light responsive element
TaBZR4.3	GT1-motif	GGTTAAT	1744	7	-	Avena sativa	light responsive element
TaBZR4.3	GT1-motif	GGTTAA	1745	6	-	Arabidopsis thaliana	light responsive element
TaBZR4.3	Sp1	GGGCGG	607	6	-	Oryza sativa	light responsive element
TaBZR4.3	Sp1	GGGCGG	902	6	-	Oryza sativa	light responsive element
TaBZR4.3	TCT-motif	TCTTAC	1358	6	-	Arabidopsis thaliana	part of a light responsive element
TaBZR4.3	MBS	CAACTG	644	6	-	Arabidopsis thaliana	MYB binding site involved in drought-inducibility
TaBZR4.3	O2-site	GATGACATGG	1778	9	-	Zea mays	cis-acting regulatory element involved in zein metabolism regulation
TaBZR4.3	GC-motif	CCCCCG	1159	6	-	Zea mays	enhancer-like element involved in anoxic specific inducibility
TaBZR4.3	GC-motif	CCCCCG	1255	6	+	Zea mays	enhancer-like element involved in anoxic specific inducibility
TaBZR4.3	LTR	CCGAAA	630	6	+	Hordeum vulgare	cis-acting element involved in low-temperature responsiveness
TaBZR4.3	LTR	CCGAAA	764	6	-	Hordeum vulgare	cis-acting element involved in low-temperature responsiveness
TaBZR4.3	TCCC-motif	TCTCCCT	1477	7	+	Spinacia oleracea	part of a light responsive element
TaBZR4.3	TGACG-motif	TGACG	472	5	+	Hordeum vulgare	cis-acting regulatory element involved in the MeJA-responsiveness
TaBZR4.3	TGACG-motif	TGACG	897	5	-	Hordeum vulgare	cis-acting regulatory element involved in the MeJA-responsiveness
TaBZR4.3	TGACG-motif	TGACG	1932	5	-	Hordeum vulgare	cis-acting regulatory element involved in the MeJA-responsiveness
TaBZR4.3	CGTCA-motif	CGTCA	472	5	-	Hordeum vulgare	cis-acting regulatory element involved in the MeJA-responsiveness
TaBZR4.3	CGTCA-motif	CGTCA	897	5	+	Hordeum vulgare	cis-acting regulatory element involved in the MeJA-responsiveness
TaBZR4.3	CGTCA-motif	CGTCA	1932	5	+	Hordeum vulgare	cis-acting regulatory element involved in the MeJA-responsiveness
TaBZR4.3	TGA-element	AACGAC	467	6	-	Brassica oleracea	auxin-responsive element
TaBZR4.3	TGA-element	AACGAC	1068	6	+	Brassica oleracea	auxin-responsive element
TaBZR4.3	G-box	CACGAC	308	6	+	Zea mays	cis-acting regulatory element involved in light responsiveness
TaBZR4.3	G-box	CACGAC	959	6	-	Zea mays	cis-acting regulatory element involved in light responsiveness
TaBZR4.3	MRE	AACCTAA	1234	7	+	Petroselinum crispum	MYB binding site involved in light responsiveness
TaBZR4.3	ARE	AAACCA	492	6	-	Zea mays	cis-acting regulatory element essential for the anaerobic induction
TaBZR4.3	ARE	AAACCA	1644	6	-	Zea mays	cis-acting regulatory element essential for the anaerobic induction
TaBZR4.3	CAT-box	GCCACT	1563	6	+	Arabidopsis thaliana	cis-acting regulatory element related to meristem expression
TaBZR4.3	GA-motif	ATAGATAA	1629	8	+	Arabidopsis thaliana	part of a light responsive element
TaBZR4.4	WUN-motif	AAATTTCCT	1116	9	-	Brassica oleracea	wound-responsive element
TaBZR4.4	CGTCA-motif	CGTCA	114	5	-	Hordeum vulgare	cis-acting regulatory element involved in the MeJA-responsiveness
TaBZR4.4	CGTCA-motif	CGTCA	651	5	+	Hordeum vulgare	cis-acting regulatory element involved in the MeJA-responsiveness
TaBZR4.4	CGTCA-motif	CGTCA	728	5	+	Hordeum vulgare	cis-acting regulatory element involved in the MeJA-responsiveness
TaBZR4.4	CGTCA-motif	CGTCA	773	5	+	Hordeum vulgare	cis-acting regulatory element involved in the MeJA-responsiveness
TaBZR4.4	CGTCA-motif	CGTCA	1962	5	-	Hordeum vulgare	cis-acting regulatory element involved in the MeJA-responsiveness
TaBZR4.4	CAT-box	GCCACT	811	6	-	Arabidopsis thaliana	cis-acting regulatory element related to meristem expression
TaBZR4.4	TCT-motif	TCTTAC	419	6	-	Arabidopsis thaliana	part of a light responsive element
TaBZR4.4	RY-element	CATGCATG	204	8	+	Helianthus annuus	cis-acting regulatory element involved in seed-specific regulation
TaBZR4.4	AAAC-motif	CAATCAAAACCT	353	11	-	Spinacia oleracea	light responsive element
TaBZR4.4	ABRE	ACGTG	726	5	-	Arabidopsis thaliana	cis-acting element involved in the abscisic acid responsiveness
TaBZR4.4	ABRE	CGCACGTGTC	1726	9	+	Hordeum vulgare	cis-acting element involved in the abscisic acid responsiveness
TaBZR4.4	ABRE	CACGTG	1728	6	-	Arabidopsis thaliana	cis-acting element involved in the abscisic acid responsiveness
TaBZR4.4	ABRE	ACGTG	1729	5	+	Arabidopsis thaliana	cis-acting element involved in the abscisic acid responsiveness
TaBZR4.4	ABRE	AACCCGG	1764	7	+	Arabidopsis thaliana	cis-acting element involved in the abscisic acid responsiveness
TaBZR4.4	TCA-element	CCATCTTTTT	1518	9	-	Nicotiana tabacum	cis-acting element involved in salicylic acid responsiveness
TaBZR4.4	MRE	AACCTAA	85	7	+	Petroselinum crispum	MYB binding site involved in light responsiveness
TaBZR4.4	G-box	CACGAC	529	6	+	Zea mays	cis-acting regulatory element involved in light responsiveness
TaBZR4.4	G-box	CAGACGTGGCA	723	10	-	Nicotiana plumbaginifolia	cis-acting regulatory element involved in light responsiveness
TaBZR4.4	G-box	CACGTC	726	6	+	Zea mays	cis-acting regulatory element involved in light responsiveness
TaBZR4.4	G-box	CACGTG	1728	6	-	Arabidopsis thaliana	cis-acting regulatory element involved in light responsiveness
TaBZR4.4	ARE	AAACCA	1584	6	+	Zea mays	cis-acting regulatory element essential for the anaerobic induction
TaBZR4.4	G-Box	TCCACATGGCA	970	10	-	Triticum aestivum	cis-acting regulatory element involved in light responsiveness
TaBZR4.4	G-Box	CACGTG	1728	6	-	Pisum sativum	cis-acting regulatory element involved in light responsiveness
TaBZR4.4	TGACG-motif	TGACG	114	5	+	Hordeum vulgare	cis-acting regulatory element involved in the MeJA-responsiveness
TaBZR4.4	TGACG-motif	TGACG	651	5	-	Hordeum vulgare	cis-acting regulatory element involved in the MeJA-responsiveness
TaBZR4.4	TGACG-motif	TGACG	728	5	-	Hordeum vulgare	cis-acting regulatory element involved in the MeJA-responsiveness
TaBZR4.4	TGACG-motif	TGACG	773	5	-	Hordeum vulgare	cis-acting regulatory element involved in the MeJA-responsiveness
TaBZR4.4	TGACG-motif	TGACG	1962	5	+	Hordeum vulgare	cis-acting regulatory element involved in the MeJA-responsiveness
TaBZR4.5	CGTCA-motif	CGTCA	723	5	+	Hordeum vulgare	cis-acting regulatory element involved in the MeJA-responsiveness
TaBZR4.5	CGTCA-motif	CGTCA	800	5	+	Hordeum vulgare	cis-acting regulatory element involved in the MeJA-responsiveness
TaBZR4.5	CGTCA-motif	CGTCA	845	5	+	Hordeum vulgare	cis-acting regulatory element involved in the MeJA-responsiveness
TaBZR4.5	TGACG-motif	TGACG	723	5	-	Hordeum vulgare	cis-acting regulatory element involved in the MeJA-responsiveness
TaBZR4.5	TGACG-motif	TGACG	800	5	-	Hordeum vulgare	cis-acting regulatory element involved in the MeJA-responsiveness
TaBZR4.5	TGACG-motif	TGACG	845	5	-	Hordeum vulgare	cis-acting regulatory element involved in the MeJA-responsiveness
TaBZR4.5	LTR	CCGAAA	1347	6	+	Hordeum vulgare	cis-acting element involved in low-temperature responsiveness
TaBZR4.5	ABRE	ACGTG	798	5	-	Arabidopsis thaliana	cis-acting element involved in the abscisic acid responsiveness
TaBZR4.5	ABRE	ACGTG	1763	5	+	Arabidopsis thaliana	cis-acting element involved in the abscisic acid responsiveness
TaBZR4.5	CAT-box	GCCACT	883	6	-	Arabidopsis thaliana	cis-acting regulatory element related to meristem expression
TaBZR4.5	RY-element	CATGCATG	5	8	+	Helianthus annuus	cis-acting regulatory element involved in seed-specific regulation
TaBZR4.5	P-box	CCTTTTG	145	7	+	Oryza sativa	gibberellin-responsive element
TaBZR4.5	MBS	CAACTG	642	6	+	Arabidopsis thaliana	MYB binding site involved in drought-inducibility
TaBZR4.5	ARE	AAACCA	1620	6	+	Zea mays	cis-acting regulatory element essential for the anaerobic induction
TaBZR4.5	ARE	AAACCA	1655	6	+	Zea mays	cis-acting regulatory element essential for the anaerobic induction
TaBZR4.5	TCT-motif	TCTTAC	634	6	+	Arabidopsis thaliana	part of a light responsive element
TaBZR4.5	G-box	CAGACGTGGCA	795	10	-	Nicotiana plumbaginifolia	cis-acting regulatory element involved in light responsiveness
TaBZR4.5	G-box	CACGTC	798	6	+	Zea mays	cis-acting regulatory element involved in light responsiveness
TaBZR4.5	G-box	TACGTG	1762	6	+	Arabidopsis thaliana	cis-acting regulatory element involved in light responsiveness
TaBZR5.1	TCCC-motif	TCTCCCT	131	7	-	Spinacia oleracea	part of a light responsive element
TaBZR5.1	O2-site	GATGACATGG	373	9	+	Zea mays	cis-acting regulatory element involved in zein metabolism regulation
TaBZR5.1	ARE	AAACCA	1822	6	+	Zea mays	cis-acting regulatory element essential for the anaerobic induction
TaBZR5.1	AE-box	AGAAACAA	99	8	+	Arabidopsis thaliana	part of a module for light response
TaBZR5.1	AE-box	AGAAACAA	584	8	+	Arabidopsis thaliana	part of a module for light response
TaBZR5.1	Box II	ACACGTAGA	307	9	+	Arabidopsis thaliana	part of a light responsive element
TaBZR5.1	ABRE	ACGTG	147	5	-	Arabidopsis thaliana	cis-acting element involved in the abscisic acid responsiveness
TaBZR5.1	ABRE	GACACGTGGC	267	9	+	Triticum aestivum	cis-acting element involved in the abscisic acid responsiveness
TaBZR5.1	ABRE	ACGTG	308	5	-	Arabidopsis thaliana	cis-acting element involved in the abscisic acid responsiveness
TaBZR5.1	ABRE	ACGTG	431	5	-	Arabidopsis thaliana	cis-acting element involved in the abscisic acid responsiveness
TaBZR5.1	ABRE	CGTACGTGCA	975	9	-	Hordeum vulgare	cis-acting element involved in the abscisic acid responsiveness
TaBZR5.1	ABRE	ACGTG	977	5	-	Arabidopsis thaliana	cis-acting element involved in the abscisic acid responsiveness
TaBZR5.1	ABRE	CGTACGTGCA	983	9	+	Hordeum vulgare	cis-acting element involved in the abscisic acid responsiveness
TaBZR5.1	ABRE	ACGTG	986	5	+	Arabidopsis thaliana	cis-acting element involved in the abscisic acid responsiveness
TaBZR5.1	ABRE	ACGTG	1429	5	-	Arabidopsis thaliana	cis-acting element involved in the abscisic acid responsiveness
TaBZR5.1	TCA-element	CCATCTTTTT	1877	9	-	Nicotiana tabacum	cis-acting element involved in salicylic acid responsiveness
TaBZR5.1	GATA-motif	GATAGGA	17	7	+	Arabidopsis thaliana	part of a light responsive element
TaBZR5.1	GATA-motif	AAGATAAGATT	817	10	+	Arabidopsis thaliana	part of a light responsive element
TaBZR5.1	GC-motif	CCCCCG	501	6	-	Zea mays	enhancer-like element involved in anoxic specific inducibility
TaBZR5.1	GC-motif	CCCCCG	1894	6	-	Zea mays	enhancer-like element involved in anoxic specific inducibility
TaBZR5.1	LTR	CCGAAA	1016	6	+	Hordeum vulgare	cis-acting element involved in low-temperature responsiveness
TaBZR5.1	CGTCA-motif	CGTCA	911	5	+	Hordeum vulgare	cis-acting regulatory element involved in the MeJA-responsiveness
TaBZR5.1	CGTCA-motif	CGTCA	1002	5	+	Hordeum vulgare	cis-acting regulatory element involved in the MeJA-responsiveness
TaBZR5.1	CGTCA-motif	CGTCA	1222	5	+	Hordeum vulgare	cis-acting regulatory element involved in the MeJA-responsiveness
TaBZR5.1	CGTCA-motif	CGTCA	1498	5	+	Hordeum vulgare	cis-acting regulatory element involved in the MeJA-responsiveness
TaBZR5.1	CGTCA-motif	CGTCA	1538	5	-	Hordeum vulgare	cis-acting regulatory element involved in the MeJA-responsiveness
TaBZR5.1	chs-Unit 1 m1	ACCTAACCCGG	958	10	+	Zea mays	part of a light responsive element
TaBZR5.1	GT1-motif	GGTTAAT	1656	7	+	Avena sativa	light responsive element
TaBZR5.1	GARE-motif	TCTGTTG	1077	7	-	Brassica oleracea	gibberellin-responsive element
TaBZR5.1	TGACG-motif	TGACG	911	5	-	Hordeum vulgare	cis-acting regulatory element involved in the MeJA-responsiveness
TaBZR5.1	TGACG-motif	TGACG	1002	5	-	Hordeum vulgare	cis-acting regulatory element involved in the MeJA-responsiveness
TaBZR5.1	TGACG-motif	TGACG	1222	5	-	Hordeum vulgare	cis-acting regulatory element involved in the MeJA-responsiveness
TaBZR5.1	TGACG-motif	TGACG	1498	5	-	Hordeum vulgare	cis-acting regulatory element involved in the MeJA-responsiveness
TaBZR5.1	TGACG-motif	TGACG	1538	5	+	Hordeum vulgare	cis-acting regulatory element involved in the MeJA-responsiveness
TaBZR5.1	TGA-element	AACGAC	680	6	-	Brassica oleracea	auxin-responsive element
TaBZR5.1	TGA-element	AACGAC	1525	6	-	Brassica oleracea	auxin-responsive element
TaBZR5.1	TGA-element	AACGAC	1561	6	-	Brassica oleracea	auxin-responsive element
TaBZR5.1	P-box	CCTTTTG	1517	7	+	Oryza sativa	gibberellin-responsive element
TaBZR5.1	TCT-motif	TCTTAC	1916	6	-	Arabidopsis thaliana	part of a light responsive element
TaBZR5.1	TCT-motif	TCTTAC	1929	6	-	Arabidopsis thaliana	part of a light responsive element
TaBZR5.1	CAT-box	GCCACT	838	6	-	Arabidopsis thaliana	cis-acting regulatory element related to meristem expression
TaBZR5.1	CAT-box	GCCACT	1203	6	+	Arabidopsis thaliana	cis-acting regulatory element related to meristem expression
TaBZR5.1	CAT-box	GCCACT	1209	6	+	Arabidopsis thaliana	cis-acting regulatory element related to meristem expression
TaBZR5.1	G-box	TACGTG	147	6	-	Arabidopsis thaliana	cis-acting regulatory element involved in light responsiveness
TaBZR5.1	G-box	TACGTG	308	6	-	Arabidopsis thaliana	cis-acting regulatory element involved in light responsiveness
TaBZR5.1	G-box	TACGTG	431	6	-	Arabidopsis thaliana	cis-acting regulatory element involved in light responsiveness
TaBZR5.1	G-box	TACGTG	977	6	-	Arabidopsis thaliana	cis-acting regulatory element involved in light responsiveness
TaBZR5.1	G-box	TACGTG	985	6	+	Arabidopsis thaliana	cis-acting regulatory element involved in light responsiveness
TaBZR5.1	G-box	CACGTC	1429	6	+	Zea mays	cis-acting regulatory element involved in light responsiveness
TaBZR5.1	G-box	CACGAC	1432	6	-	Zea mays	cis-acting regulatory element involved in light responsiveness
TaBZR5.1	Sp1	GGGCGG	1310	6	+	Oryza sativa	light responsive element
TaBZR5.1	Sp1	GGGCGG	1418	6	-	Oryza sativa	light responsive element
TaBZR5.1	TC-rich repeats	GTTTTCTTAC	1508	9	+	Nicotiana tabacum	cis-acting element involved in defense and stress responsiveness
TaBZR5.2	CAT-box	GCCACT	1249	6	+	Arabidopsis thaliana	cis-acting regulatory element related to meristem expression
TaBZR5.2	CAT-box	GCCACT	1255	6	+	Arabidopsis thaliana	cis-acting regulatory element related to meristem expression
TaBZR5.2	G-box	TACGTG	54	6	-	Arabidopsis thaliana	cis-acting regulatory element involved in light responsiveness
TaBZR5.2	G-box	TACGTG	168	6	-	Arabidopsis thaliana	cis-acting regulatory element involved in light responsiveness
TaBZR5.2	G-box	TACGTG	259	6	+	Arabidopsis thaliana	cis-acting regulatory element involved in light responsiveness
TaBZR5.2	G-box	CACGAC	628	6	+	Zea mays	cis-acting regulatory element involved in light responsiveness
TaBZR5.2	G-box	TACGTG	1641	6	+	Arabidopsis thaliana	cis-acting regulatory element involved in light responsiveness
TaBZR5.2	circadian	CAAAGATATC	1203	9	+	Lycopersicon esculentum	cis-acting regulatory element involved in circadian control
TaBZR5.2	TGACG-motif	TGACG	643	5	-	Hordeum vulgare	cis-acting regulatory element involved in the MeJA-responsiveness
TaBZR5.2	TGACG-motif	TGACG	1268	5	-	Hordeum vulgare	cis-acting regulatory element involved in the MeJA-responsiveness
TaBZR5.2	TGACG-motif	TGACG	1506	5	-	Hordeum vulgare	cis-acting regulatory element involved in the MeJA-responsiveness
TaBZR5.2	TGACG-motif	TGACG	1548	5	+	Hordeum vulgare	cis-acting regulatory element involved in the MeJA-responsiveness
TaBZR5.2	TGACG-motif	TGACG	1744	5	+	Hordeum vulgare	cis-acting regulatory element involved in the MeJA-responsiveness
TaBZR5.2	GARE-motif	TCTGTTG	1049	7	-	Brassica oleracea	gibberellin-responsive element
TaBZR5.2	LTR	CCGAAA	572	6	-	Hordeum vulgare	cis-acting element involved in low-temperature responsiveness
TaBZR5.2	CGTCA-motif	CGTCA	643	5	+	Hordeum vulgare	cis-acting regulatory element involved in the MeJA-responsiveness
TaBZR5.2	CGTCA-motif	CGTCA	1268	5	+	Hordeum vulgare	cis-acting regulatory element involved in the MeJA-responsiveness
TaBZR5.2	CGTCA-motif	CGTCA	1506	5	+	Hordeum vulgare	cis-acting regulatory element involved in the MeJA-responsiveness
TaBZR5.2	CGTCA-motif	CGTCA	1548	5	-	Hordeum vulgare	cis-acting regulatory element involved in the MeJA-responsiveness
TaBZR5.2	CGTCA-motif	CGTCA	1744	5	-	Hordeum vulgare	cis-acting regulatory element involved in the MeJA-responsiveness
TaBZR5.2	Sp1	GGGCGG	1004	6	+	Oryza sativa	light responsive element
TaBZR5.2	GATA-motif	GATAGGG	363	7	+	Pisum sativum	part of a light responsive element
TaBZR5.2	GATA-motif	AAGATAAGATT	1382	10	+	Arabidopsis thaliana	part of a light responsive element
TaBZR5.2	G-Box	CACGTT	633	6	+	Pisum sativum	cis-acting regulatory element involved in light responsiveness
TaBZR5.2	ABRE	ACGTG	54	5	-	Arabidopsis thaliana	cis-acting element involved in the abscisic acid responsiveness
TaBZR5.2	ABRE	ACGTG	168	5	-	Arabidopsis thaliana	cis-acting element involved in the abscisic acid responsiveness
TaBZR5.2	ABRE	ACGTG	260	5	+	Arabidopsis thaliana	cis-acting element involved in the abscisic acid responsiveness
TaBZR5.2	ABRE	CGCACGTGTC	631	9	-	Hordeum vulgare	cis-acting element involved in the abscisic acid responsiveness
TaBZR5.2	ABRE	ACGTG	633	5	-	Arabidopsis thaliana	cis-acting element involved in the abscisic acid responsiveness
TaBZR5.2	ABRE	ACGTG	1642	5	+	Arabidopsis thaliana	cis-acting element involved in the abscisic acid responsiveness
TaBZR5.2	TATC-box	TATCCCA	1565	7	-	Oryza sativa	cis-acting element involved in gibberellin-responsiveness
TaBZR5.2	GT1-motif	GGTTAAT	1656	7	+	Avena sativa	light responsive element
TaBZR5.2	TCT-motif	TCTTAC	1940	6	-	Arabidopsis thaliana	part of a light responsive element
TaBZR5.3	chs-Unit 1 m1	ACCTAACCCGG	959	10	-	Zea mays	part of a light responsive element
TaBZR5.3	ACE	GACACGTATG	777	9	+	Petroselinum crispum	cis-acting element involved in light responsiveness
TaBZR5.3	GT1-motif	GGTTAAT	1665	7	+	Avena sativa	light responsive element
TaBZR5.3	G-Box	CACGTT	779	6	+	Pisum sativum	cis-acting regulatory element involved in light responsiveness
TaBZR5.3	TGA-element	AACGAC	1580	6	-	Brassica oleracea	auxin-responsive element
TaBZR5.3	TGA-element	AACGAC	1709	6	-	Brassica oleracea	auxin-responsive element
TaBZR5.3	G-box	TACGTG	88	6	-	Arabidopsis thaliana	cis-acting regulatory element involved in light responsiveness
TaBZR5.3	G-box	TACGTG	215	6	-	Arabidopsis thaliana	cis-acting regulatory element involved in light responsiveness
TaBZR5.3	G-box	CACGAC	774	6	+	Zea mays	cis-acting regulatory element involved in light responsiveness
TaBZR5.3	G-box	TACGTG	882	6	-	Arabidopsis thaliana	cis-acting regulatory element involved in light responsiveness
TaBZR5.3	G-box	TACGTG	886	6	+	Arabidopsis thaliana	cis-acting regulatory element involved in light responsiveness
TaBZR5.3	TCT-motif	TCTTAC	1938	6	-	Arabidopsis thaliana	part of a light responsive element
TaBZR5.3	CGTCA-motif	CGTCA	698	5	+	Hordeum vulgare	cis-acting regulatory element involved in the MeJA-responsiveness
TaBZR5.3	CGTCA-motif	CGTCA	789	5	+	Hordeum vulgare	cis-acting regulatory element involved in the MeJA-responsiveness
TaBZR5.3	CGTCA-motif	CGTCA	903	5	+	Hordeum vulgare	cis-acting regulatory element involved in the MeJA-responsiveness
TaBZR5.3	CGTCA-motif	CGTCA	1263	5	+	Hordeum vulgare	cis-acting regulatory element involved in the MeJA-responsiveness
TaBZR5.3	CGTCA-motif	CGTCA	1518	5	+	Hordeum vulgare	cis-acting regulatory element involved in the MeJA-responsiveness
TaBZR5.3	CGTCA-motif	CGTCA	1559	5	-	Hordeum vulgare	cis-acting regulatory element involved in the MeJA-responsiveness
TaBZR5.3	CGTCA-motif	CGTCA	1753	5	-	Hordeum vulgare	cis-acting regulatory element involved in the MeJA-responsiveness
TaBZR5.3	P-box	CCTTTTG	840	7	-	Oryza sativa	gibberellin-responsive element
TaBZR5.3	Sp1	GGGCGG	27	6	-	Oryza sativa	light responsive element
TaBZR5.3	Sp1	GGGCGG	72	6	+	Oryza sativa	light responsive element
TaBZR5.3	Sp1	GGGCGG	845	6	+	Oryza sativa	light responsive element
TaBZR5.3	Sp1	GGGCGG	973	6	+	Oryza sativa	light responsive element
TaBZR5.3	Sp1	GGGCGG	1136	6	-	Oryza sativa	light responsive element
TaBZR5.3	Sp1	GGGCGG	1945	6	-	Oryza sativa	light responsive element
TaBZR5.3	TGACG-motif	TGACG	698	5	-	Hordeum vulgare	cis-acting regulatory element involved in the MeJA-responsiveness
TaBZR5.3	TGACG-motif	TGACG	789	5	-	Hordeum vulgare	cis-acting regulatory element involved in the MeJA-responsiveness
TaBZR5.3	TGACG-motif	TGACG	903	5	-	Hordeum vulgare	cis-acting regulatory element involved in the MeJA-responsiveness
TaBZR5.3	TGACG-motif	TGACG	1263	5	-	Hordeum vulgare	cis-acting regulatory element involved in the MeJA-responsiveness
TaBZR5.3	TGACG-motif	TGACG	1518	5	-	Hordeum vulgare	cis-acting regulatory element involved in the MeJA-responsiveness
TaBZR5.3	TGACG-motif	TGACG	1559	5	+	Hordeum vulgare	cis-acting regulatory element involved in the MeJA-responsiveness
TaBZR5.3	TGACG-motif	TGACG	1753	5	+	Hordeum vulgare	cis-acting regulatory element involved in the MeJA-responsiveness
TaBZR5.3	TCA-element	CCATCTTTTT	518	9	-	Nicotiana tabacum	cis-acting element involved in salicylic acid responsiveness
TaBZR5.3	CAT-box	GCCACT	993	6	+	Arabidopsis thaliana	cis-acting regulatory element related to meristem expression
TaBZR5.3	CAT-box	GCCACT	1250	6	+	Arabidopsis thaliana	cis-acting regulatory element related to meristem expression
TaBZR5.3	ABRE	ACGTG	88	5	-	Arabidopsis thaliana	cis-acting element involved in the abscisic acid responsiveness
TaBZR5.3	ABRE	ACGTG	215	5	-	Arabidopsis thaliana	cis-acting element involved in the abscisic acid responsiveness
TaBZR5.3	ABRE	ACGTG	779	5	-	Arabidopsis thaliana	cis-acting element involved in the abscisic acid responsiveness
TaBZR5.3	ABRE	CGTACGTGCA	880	9	-	Hordeum vulgare	cis-acting element involved in the abscisic acid responsiveness
TaBZR5.3	ABRE	ACGTG	882	5	-	Arabidopsis thaliana	cis-acting element involved in the abscisic acid responsiveness
TaBZR5.3	ABRE	CGTACGTGCA	884	9	+	Hordeum vulgare	cis-acting element involved in the abscisic acid responsiveness
TaBZR5.3	ABRE	ACGTG	887	5	+	Arabidopsis thaliana	cis-acting element involved in the abscisic acid responsiveness
TaBZR5.3	GATA-motif	AAGATAAGATT	1399	10	+	Arabidopsis thaliana	part of a light responsive element
TaBZR5.3	circadian	CAAAGATATC	1192	9	+	Lycopersicon esculentum	cis-acting regulatory element involved in circadian control
TaBZR5.3	GARE-motif	TCTGTTG	1018	7	-	Brassica oleracea	gibberellin-responsive element
TaBZR6	CGTCA-motif	CGTCA	185	5	+	Hordeum vulgare	cis-acting regulatory element involved in the MeJA-responsiveness
TaBZR6	CGTCA-motif	CGTCA	1869	5	+	Hordeum vulgare	cis-acting regulatory element involved in the MeJA-responsiveness
TaBZR6	CGTCA-motif	CGTCA	1947	5	+	Hordeum vulgare	cis-acting regulatory element involved in the MeJA-responsiveness
TaBZR6	LTR	CCGAAA	1346	6	+	Hordeum vulgare	cis-acting element involved in low-temperature responsiveness
TaBZR6	CAT-box	GCCACT	29	6	-	Arabidopsis thaliana	cis-acting regulatory element related to meristem expression
TaBZR6	CAT-box	GCCACT	1552	6	+	Arabidopsis thaliana	cis-acting regulatory element related to meristem expression
TaBZR6	TGACG-motif	TGACG	185	5	-	Hordeum vulgare	cis-acting regulatory element involved in the MeJA-responsiveness
TaBZR6	TGACG-motif	TGACG	1869	5	-	Hordeum vulgare	cis-acting regulatory element involved in the MeJA-responsiveness
TaBZR6	TGACG-motif	TGACG	1947	5	-	Hordeum vulgare	cis-acting regulatory element involved in the MeJA-responsiveness
TaBZR6	ARE	AAACCA	1537	6	-	Zea mays	cis-acting regulatory element essential for the anaerobic induction
TaBZR6	ARE	AAACCA	1645	6	-	Zea mays	cis-acting regulatory element essential for the anaerobic induction
TaBZR6	GT1-motif	GGTTAAT	1039	7	-	Avena sativa	light responsive element
TaBZR6	GT1-motif	GGTTAA	1040	6	-	Arabidopsis thaliana	light responsive element
TaBZR6	GT1-motif	GGTTAAT	1781	7	-	Avena sativa	light responsive element
TaBZR6	GT1-motif	GGTTAA	1782	6	-	Arabidopsis thaliana	light responsive element
TaBZR6	TC-rich repeats	ATTCTCTAAC	1503	9	+	Nicotiana tabacum	cis-acting element involved in defense and stress responsiveness
TaBZR6	Box 4	ATTAAT	805	6	+	Petroselinum crispum	part of a conserved DNA module involved in light responsiveness
TaBZR6	TCCC-motif	TCTCCCT	1466	7	+	Spinacia oleracea	part of a light responsive element
TaBZR6	TATC-box	TATCCCA	1454	7	+	Oryza sativa	cis-acting element involved in gibberellin-responsiveness
TaBZR6	chs-CMA1a	TTACTTAA	815	8	+	Daucus carota	part of a light responsive element
TaBZR6	chs-CMA1a	TTACTTAA	858	8	+	Daucus carota	part of a light responsive element
TaBZR6	MBS	CAACTG	1320	6	+	Arabidopsis thaliana	MYB binding site involved in drought-inducibility
TaBZR6	G-box	CACGTC	1462	6	+	Zea mays	cis-acting regulatory element involved in light responsiveness
TaBZR6	ABRE	ACGTG	1462	5	-	Arabidopsis thaliana	cis-acting element involved in the abscisic acid responsiveness
