# Supplementary material for: Genome-Wide Identification and Characterization of the Brassinazole-resistant (BZR) Gene Family and Its Expression in the Various Developmental Stage and Stress Conditions in Wheat (Triticum aestivum L.)
Source: Int J Mol Sci. 2021 Aug 14;22(16):8743. doi: 10.3390/ijms22168743 (PMC8395832; doi:10.3390/ijms22168743)
Supplement: Supplementary file 1 [file ijms-22-08743-s001.zip › Table S7.xls]

## Sheet: Sheet1
Table S7. Significant Go term predicted by AgriGo in TaBZR gene family.
GO Accesion	Term_type	Term	Query item	Query total	Background item	Back ground total	p-value	FDR	Entries
GO:0043401	P	steroid hormone mediated signaling pathway	12	19	1496	85761	3.8e-17	4.6e-15	// TraesCS2D02G199900 // TraesCS6D02G318800 // TraesCS3A02G139000 // TraesCS2A02G187800 // TraesCS7D02G368000 // TraesCS3B02G156600 // TraesCS6B02G368700 // TraesCS3D02G139300 // TraesCS7B02G272900 // TraesCS7A02G354800 // TraesCS6A02G338000 // TraesCS2B02G219300
GO:0048545	P	response to steroid hormone	12	19	1496	85761	3.8e-17	4.6e-15	// TraesCS2D02G199900 // TraesCS6D02G318800 // TraesCS3A02G139000 // TraesCS2A02G187800 // TraesCS7D02G368000 // TraesCS3B02G156600 // TraesCS6B02G368700 // TraesCS3D02G139300 // TraesCS7B02G272900 // TraesCS7A02G354800 // TraesCS6A02G338000 // TraesCS2B02G219300
GO:0071383	P	cellular response to steroid hormone stimulus	12	19	1496	85761	3.8e-17	4.6e-15	// TraesCS2D02G199900 // TraesCS6D02G318800 // TraesCS3A02G139000 // TraesCS2A02G187800 // TraesCS7D02G368000 // TraesCS3B02G156600 // TraesCS6B02G368700 // TraesCS3D02G139300 // TraesCS7B02G272900 // TraesCS7A02G354800 // TraesCS6A02G338000 // TraesCS2B02G219300
GO:0009742	P	brassinosteroid mediated signaling pathway	12	19	1493	85761	3.7e-17	4.6e-15	// TraesCS2D02G199900 // TraesCS6D02G318800 // TraesCS3A02G139000 // TraesCS2A02G187800 // TraesCS7D02G368000 // TraesCS3B02G156600 // TraesCS6B02G368700 // TraesCS3D02G139300 // TraesCS7B02G272900 // TraesCS7A02G354800 // TraesCS6A02G338000 // TraesCS2B02G219300
GO:0071367	P	cellular response to brassinosteroid stimulus	12	19	1528	85761	4.8e-17	4.8e-15	// TraesCS2D02G199900 // TraesCS6D02G318800 // TraesCS3A02G139000 // TraesCS2A02G187800 // TraesCS7D02G368000 // TraesCS3B02G156600 // TraesCS6B02G368700 // TraesCS3D02G139300 // TraesCS7B02G272900 // TraesCS7A02G354800 // TraesCS6A02G338000 // TraesCS2B02G219300
GO:0009741	P	response to brassinosteroid	12	19	2057	85761	1.6e-15	1.3e-13	// TraesCS2D02G199900 // TraesCS6D02G318800 // TraesCS3A02G139000 // TraesCS2A02G187800 // TraesCS7D02G368000 // TraesCS3B02G156600 // TraesCS6B02G368700 // TraesCS3D02G139300 // TraesCS7B02G272900 // TraesCS7A02G354800 // TraesCS6A02G338000 // TraesCS2B02G219300
GO:0071407	P	cellular response to organic cyclic compound	12	19	4349	85761	1.1e-11	7.5e-10	// TraesCS2D02G199900 // TraesCS6D02G318800 // TraesCS3A02G139000 // TraesCS2A02G187800 // TraesCS7D02G368000 // TraesCS3B02G156600 // TraesCS6B02G368700 // TraesCS3D02G139300 // TraesCS7B02G272900 // TraesCS7A02G354800 // TraesCS6A02G338000 // TraesCS2B02G219300
GO:0042538	P	hyperosmotic salinity response	9	19	1624	85761	2.5e-11	1.4e-09	// TraesCS6D02G318800 // TraesCS3A02G139000 // TraesCS7D02G368000 // TraesCS3B02G156600 // TraesCS6B02G368700 // TraesCS3D02G139300 // TraesCS7B02G272900 // TraesCS7A02G354800 // TraesCS6A02G338000
GO:0071396	P	cellular response to lipid	12	19	4697	85761	2.6e-11	1.4e-09	// TraesCS2D02G199900 // TraesCS6D02G318800 // TraesCS3A02G139000 // TraesCS2A02G187800 // TraesCS7D02G368000 // TraesCS3B02G156600 // TraesCS6B02G368700 // TraesCS3D02G139300 // TraesCS7B02G272900 // TraesCS7A02G354800 // TraesCS6A02G338000 // TraesCS2B02G219300
GO:0006972	P	hyperosmotic response	9	19	2064	85761	2.1e-10	1e-08	// TraesCS6D02G318800 // TraesCS3A02G139000 // TraesCS7D02G368000 // TraesCS3B02G156600 // TraesCS6B02G368700 // TraesCS3D02G139300 // TraesCS7B02G272900 // TraesCS7A02G354800 // TraesCS6A02G338000
GO:2001141	P	regulation of RNA biosynthetic process	15	19	11903	85761	3.1e-10	1.2e-08	// TraesCS6D02G318800 // TraesCS6A02G085800 // TraesCS3A02G139000 // TraesCS4D02G006100 // TraesCS2D02G199900 // TraesCS2A02G187800 // TraesCS7D02G368000 // TraesCS6B02G116400 // TraesCS3B02G156600 // TraesCS6B02G368700 // TraesCS3D02G139300 // TraesCS7B02G272900 // TraesCS7A02G354800 // TraesCS6A02G338000 // TraesCS2B02G219300
GO:0006355	P	regulation of transcription, DNA-templated	15	19	11847	85761	2.9e-10	1.2e-08	// TraesCS6D02G318800 // TraesCS6A02G085800 // TraesCS3A02G139000 // TraesCS4D02G006100 // TraesCS2D02G199900 // TraesCS2A02G187800 // TraesCS7D02G368000 // TraesCS6B02G116400 // TraesCS3B02G156600 // TraesCS6B02G368700 // TraesCS3D02G139300 // TraesCS7B02G272900 // TraesCS7A02G354800 // TraesCS6A02G338000 // TraesCS2B02G219300
GO:1903506	P	regulation of nucleic acid-templated transcription	15	19	11900	85761	3e-10	1.2e-08	// TraesCS6D02G318800 // TraesCS6A02G085800 // TraesCS3A02G139000 // TraesCS4D02G006100 // TraesCS2D02G199900 // TraesCS2A02G187800 // TraesCS7D02G368000 // TraesCS6B02G116400 // TraesCS3B02G156600 // TraesCS6B02G368700 // TraesCS3D02G139300 // TraesCS7B02G272900 // TraesCS7A02G354800 // TraesCS6A02G338000 // TraesCS2B02G219300
GO:0051252	P	regulation of RNA metabolic process	15	19	11990	85761	3.4e-10	1.2e-08	// TraesCS6D02G318800 // TraesCS6A02G085800 // TraesCS3A02G139000 // TraesCS4D02G006100 // TraesCS2D02G199900 // TraesCS2A02G187800 // TraesCS7D02G368000 // TraesCS6B02G116400 // TraesCS3B02G156600 // TraesCS6B02G368700 // TraesCS3D02G139300 // TraesCS7B02G272900 // TraesCS7A02G354800 // TraesCS6A02G338000 // TraesCS2B02G219300
GO:0019219	P	regulation of nucleobase-containing compound metabolic process	15	19	12393	85761	5.5e-10	1.8e-08	// TraesCS6D02G318800 // TraesCS6A02G085800 // TraesCS3A02G139000 // TraesCS4D02G006100 // TraesCS2D02G199900 // TraesCS2A02G187800 // TraesCS7D02G368000 // TraesCS6B02G116400 // TraesCS3B02G156600 // TraesCS6B02G368700 // TraesCS3D02G139300 // TraesCS7B02G272900 // TraesCS7A02G354800 // TraesCS6A02G338000 // TraesCS2B02G219300
GO:2000112	P	regulation of cellular macromolecule biosynthetic process	15	19	12835	85761	9e-10	2.8e-08	// TraesCS6D02G318800 // TraesCS6A02G085800 // TraesCS3A02G139000 // TraesCS4D02G006100 // TraesCS2D02G199900 // TraesCS2A02G187800 // TraesCS7D02G368000 // TraesCS6B02G116400 // TraesCS3B02G156600 // TraesCS6B02G368700 // TraesCS3D02G139300 // TraesCS7B02G272900 // TraesCS7A02G354800 // TraesCS6A02G338000 // TraesCS2B02G219300
GO:0010556	P	regulation of macromolecule biosynthetic process	15	19	12897	85761	9.7e-10	2.8e-08	// TraesCS6D02G318800 // TraesCS6A02G085800 // TraesCS3A02G139000 // TraesCS4D02G006100 // TraesCS2D02G199900 // TraesCS2A02G187800 // TraesCS7D02G368000 // TraesCS6B02G116400 // TraesCS3B02G156600 // TraesCS6B02G368700 // TraesCS3D02G139300 // TraesCS7B02G272900 // TraesCS7A02G354800 // TraesCS6A02G338000 // TraesCS2B02G219300
GO:0097659	P	nucleic acid-templated transcription	15	19	13260	85761	1.4e-09	3.5e-08	// TraesCS6D02G318800 // TraesCS6A02G085800 // TraesCS3A02G139000 // TraesCS4D02G006100 // TraesCS2D02G199900 // TraesCS2A02G187800 // TraesCS7D02G368000 // TraesCS6B02G116400 // TraesCS3B02G156600 // TraesCS6B02G368700 // TraesCS3D02G139300 // TraesCS7B02G272900 // TraesCS7A02G354800 // TraesCS6A02G338000 // TraesCS2B02G219300
GO:0006351	P	transcription, DNA-templated	15	19	13208	85761	1.4e-09	3.5e-08	// TraesCS6D02G318800 // TraesCS6A02G085800 // TraesCS3A02G139000 // TraesCS4D02G006100 // TraesCS2D02G199900 // TraesCS2A02G187800 // TraesCS7D02G368000 // TraesCS6B02G116400 // TraesCS3B02G156600 // TraesCS6B02G368700 // TraesCS3D02G139300 // TraesCS7B02G272900 // TraesCS7A02G354800 // TraesCS6A02G338000 // TraesCS2B02G219300
GO:0032774	P	RNA biosynthetic process	15	19	13296	85761	1.5e-09	3.5e-08	// TraesCS6D02G318800 // TraesCS6A02G085800 // TraesCS3A02G139000 // TraesCS4D02G006100 // TraesCS2D02G199900 // TraesCS2A02G187800 // TraesCS7D02G368000 // TraesCS6B02G116400 // TraesCS3B02G156600 // TraesCS6B02G368700 // TraesCS3D02G139300 // TraesCS7B02G272900 // TraesCS7A02G354800 // TraesCS6A02G338000 // TraesCS2B02G219300
GO:0051171	P	regulation of nitrogen compound metabolic process	15	19	13256	85761	1.4e-09	3.5e-08	// TraesCS6D02G318800 // TraesCS6A02G085800 // TraesCS3A02G139000 // TraesCS4D02G006100 // TraesCS2D02G199900 // TraesCS2A02G187800 // TraesCS7D02G368000 // TraesCS6B02G116400 // TraesCS3B02G156600 // TraesCS6B02G368700 // TraesCS3D02G139300 // TraesCS7B02G272900 // TraesCS7A02G354800 // TraesCS6A02G338000 // TraesCS2B02G219300
GO:0010468	P	regulation of gene expression	15	19	13706	85761	2.3e-09	5.2e-08	// TraesCS6D02G318800 // TraesCS6A02G085800 // TraesCS3A02G139000 // TraesCS4D02G006100 // TraesCS2D02G199900 // TraesCS2A02G187800 // TraesCS7D02G368000 // TraesCS6B02G116400 // TraesCS3B02G156600 // TraesCS6B02G368700 // TraesCS3D02G139300 // TraesCS7B02G272900 // TraesCS7A02G354800 // TraesCS6A02G338000 // TraesCS2B02G219300
GO:0031326	P	regulation of cellular biosynthetic process	15	19	13821	85761	2.6e-09	5.6e-08	// TraesCS6D02G318800 // TraesCS6A02G085800 // TraesCS3A02G139000 // TraesCS4D02G006100 // TraesCS2D02G199900 // TraesCS2A02G187800 // TraesCS7D02G368000 // TraesCS6B02G116400 // TraesCS3B02G156600 // TraesCS6B02G368700 // TraesCS3D02G139300 // TraesCS7B02G272900 // TraesCS7A02G354800 // TraesCS6A02G338000 // TraesCS2B02G219300
GO:0014070	P	response to organic cyclic compound	12	19	7087	85761	3e-09	6.1e-08	// TraesCS2D02G199900 // TraesCS6D02G318800 // TraesCS3A02G139000 // TraesCS2A02G187800 // TraesCS7D02G368000 // TraesCS3B02G156600 // TraesCS6B02G368700 // TraesCS3D02G139300 // TraesCS7B02G272900 // TraesCS7A02G354800 // TraesCS6A02G338000 // TraesCS2B02G219300
GO:0009889	P	regulation of biosynthetic process	15	19	14389	85761	4.6e-09	9.1e-08	// TraesCS6D02G318800 // TraesCS6A02G085800 // TraesCS3A02G139000 // TraesCS4D02G006100 // TraesCS2D02G199900 // TraesCS2A02G187800 // TraesCS7D02G368000 // TraesCS6B02G116400 // TraesCS3B02G156600 // TraesCS6B02G368700 // TraesCS3D02G139300 // TraesCS7B02G272900 // TraesCS7A02G354800 // TraesCS6A02G338000 // TraesCS2B02G219300
GO:0034654	P	nucleobase-containing compound biosynthetic process	15	19	14983	85761	8.2e-09	1.6e-07	// TraesCS6D02G318800 // TraesCS6A02G085800 // TraesCS3A02G139000 // TraesCS4D02G006100 // TraesCS2D02G199900 // TraesCS2A02G187800 // TraesCS7D02G368000 // TraesCS6B02G116400 // TraesCS3B02G156600 // TraesCS6B02G368700 // TraesCS3D02G139300 // TraesCS7B02G272900 // TraesCS7A02G354800 // TraesCS6A02G338000 // TraesCS2B02G219300
GO:1901701	P	cellular response to oxygen-containing compound	12	19	8136	85761	1.4e-08	2.6e-07	// TraesCS2D02G199900 // TraesCS6D02G318800 // TraesCS3A02G139000 // TraesCS2A02G187800 // TraesCS7D02G368000 // TraesCS3B02G156600 // TraesCS6B02G368700 // TraesCS3D02G139300 // TraesCS7B02G272900 // TraesCS7A02G354800 // TraesCS6A02G338000 // TraesCS2B02G219300
GO:0009755	P	hormone-mediated signaling pathway	12	19	8230	85761	1.6e-08	2.9e-07	// TraesCS2D02G199900 // TraesCS6D02G318800 // TraesCS3A02G139000 // TraesCS2A02G187800 // TraesCS7D02G368000 // TraesCS3B02G156600 // TraesCS6B02G368700 // TraesCS3D02G139300 // TraesCS7B02G272900 // TraesCS7A02G354800 // TraesCS6A02G338000 // TraesCS2B02G219300
GO:0033993	P	response to lipid	12	19	8254	85761	1.7e-08	2.9e-07	// TraesCS2D02G199900 // TraesCS6D02G318800 // TraesCS3A02G139000 // TraesCS2A02G187800 // TraesCS7D02G368000 // TraesCS3B02G156600 // TraesCS6B02G368700 // TraesCS3D02G139300 // TraesCS7B02G272900 // TraesCS7A02G354800 // TraesCS6A02G338000 // TraesCS2B02G219300
GO:0060255	P	regulation of macromolecule metabolic process	15	19	15862	85761	1.8e-08	3e-07	// TraesCS6D02G318800 // TraesCS6A02G085800 // TraesCS3A02G139000 // TraesCS4D02G006100 // TraesCS2D02G199900 // TraesCS2A02G187800 // TraesCS7D02G368000 // TraesCS6B02G116400 // TraesCS3B02G156600 // TraesCS6B02G368700 // TraesCS3D02G139300 // TraesCS7B02G272900 // TraesCS7A02G354800 // TraesCS6A02G338000 // TraesCS2B02G219300
GO:0080090	P	regulation of primary metabolic process	15	19	16181	85761	2.4e-08	3.9e-07	// TraesCS6D02G318800 // TraesCS6A02G085800 // TraesCS3A02G139000 // TraesCS4D02G006100 // TraesCS2D02G199900 // TraesCS2A02G187800 // TraesCS7D02G368000 // TraesCS6B02G116400 // TraesCS3B02G156600 // TraesCS6B02G368700 // TraesCS3D02G139300 // TraesCS7B02G272900 // TraesCS7A02G354800 // TraesCS6A02G338000 // TraesCS2B02G219300
GO:0071495	P	cellular response to endogenous stimulus	12	19	8682	85761	3e-08	4.4e-07	// TraesCS2D02G199900 // TraesCS6D02G318800 // TraesCS3A02G139000 // TraesCS2A02G187800 // TraesCS7D02G368000 // TraesCS3B02G156600 // TraesCS6B02G368700 // TraesCS3D02G139300 // TraesCS7B02G272900 // TraesCS7A02G354800 // TraesCS6A02G338000 // TraesCS2B02G219300
GO:0032870	P	cellular response to hormone stimulus	12	19	8667	85761	2.9e-08	4.4e-07	// TraesCS2D02G199900 // TraesCS6D02G318800 // TraesCS3A02G139000 // TraesCS2A02G187800 // TraesCS7D02G368000 // TraesCS3B02G156600 // TraesCS6B02G368700 // TraesCS3D02G139300 // TraesCS7B02G272900 // TraesCS7A02G354800 // TraesCS6A02G338000 // TraesCS2B02G219300
GO:0031323	P	regulation of cellular metabolic process	15	19	16433	85761	3e-08	4.4e-07	// TraesCS6D02G318800 // TraesCS6A02G085800 // TraesCS3A02G139000 // TraesCS4D02G006100 // TraesCS2D02G199900 // TraesCS2A02G187800 // TraesCS7D02G368000 // TraesCS6B02G116400 // TraesCS3B02G156600 // TraesCS6B02G368700 // TraesCS3D02G139300 // TraesCS7B02G272900 // TraesCS7A02G354800 // TraesCS6A02G338000 // TraesCS2B02G219300
GO:0018130	P	heterocycle biosynthetic process	15	19	17011	85761	5e-08	7e-07	// TraesCS6D02G318800 // TraesCS6A02G085800 // TraesCS3A02G139000 // TraesCS4D02G006100 // TraesCS2D02G199900 // TraesCS2A02G187800 // TraesCS7D02G368000 // TraesCS6B02G116400 // TraesCS3B02G156600 // TraesCS6B02G368700 // TraesCS3D02G139300 // TraesCS7B02G272900 // TraesCS7A02G354800 // TraesCS6A02G338000 // TraesCS2B02G219300
GO:0019438	P	aromatic compound biosynthetic process	15	19	17826	85761	9.6e-08	1.3e-06	// TraesCS6D02G318800 // TraesCS6A02G085800 // TraesCS3A02G139000 // TraesCS4D02G006100 // TraesCS2D02G199900 // TraesCS2A02G187800 // TraesCS7D02G368000 // TraesCS6B02G116400 // TraesCS3B02G156600 // TraesCS6B02G368700 // TraesCS3D02G139300 // TraesCS7B02G272900 // TraesCS7A02G354800 // TraesCS6A02G338000 // TraesCS2B02G219300
GO:0016070	P	RNA metabolic process	15	19	17938	85761	1e-07	1.4e-06	// TraesCS6D02G318800 // TraesCS6A02G085800 // TraesCS3A02G139000 // TraesCS4D02G006100 // TraesCS2D02G199900 // TraesCS2A02G187800 // TraesCS7D02G368000 // TraesCS6B02G116400 // TraesCS3B02G156600 // TraesCS6B02G368700 // TraesCS3D02G139300 // TraesCS7B02G272900 // TraesCS7A02G354800 // TraesCS6A02G338000 // TraesCS2B02G219300
GO:0019222	P	regulation of metabolic process	15	19	18524	85761	1.6e-07	2.1e-06	// TraesCS6D02G318800 // TraesCS6A02G085800 // TraesCS3A02G139000 // TraesCS4D02G006100 // TraesCS2D02G199900 // TraesCS2A02G187800 // TraesCS7D02G368000 // TraesCS6B02G116400 // TraesCS3B02G156600 // TraesCS6B02G368700 // TraesCS3D02G139300 // TraesCS7B02G272900 // TraesCS7A02G354800 // TraesCS6A02G338000 // TraesCS2B02G219300
GO:1901362	P	organic cyclic compound biosynthetic process	15	19	18790	85761	2e-07	2.5e-06	// TraesCS6D02G318800 // TraesCS6A02G085800 // TraesCS3A02G139000 // TraesCS4D02G006100 // TraesCS2D02G199900 // TraesCS2A02G187800 // TraesCS7D02G368000 // TraesCS6B02G116400 // TraesCS3B02G156600 // TraesCS6B02G368700 // TraesCS3D02G139300 // TraesCS7B02G272900 // TraesCS7A02G354800 // TraesCS6A02G338000 // TraesCS2B02G219300
GO:0071310	P	cellular response to organic substance	12	19	10300	85761	2e-07	2.5e-06	// TraesCS2D02G199900 // TraesCS6D02G318800 // TraesCS3A02G139000 // TraesCS2A02G187800 // TraesCS7D02G368000 // TraesCS3B02G156600 // TraesCS6B02G368700 // TraesCS3D02G139300 // TraesCS7B02G272900 // TraesCS7A02G354800 // TraesCS6A02G338000 // TraesCS2B02G219300
GO:0044271	P	cellular nitrogen compound biosynthetic process	15	19	19482	85761	3.3e-07	4e-06	// TraesCS6D02G318800 // TraesCS6A02G085800 // TraesCS3A02G139000 // TraesCS4D02G006100 // TraesCS2D02G199900 // TraesCS2A02G187800 // TraesCS7D02G368000 // TraesCS6B02G116400 // TraesCS3B02G156600 // TraesCS6B02G368700 // TraesCS3D02G139300 // TraesCS7B02G272900 // TraesCS7A02G354800 // TraesCS6A02G338000 // TraesCS2B02G219300
GO:0090304	P	nucleic acid metabolic process	15	19	19905	85761	4.5e-07	5.2e-06	// TraesCS6D02G318800 // TraesCS6A02G085800 // TraesCS3A02G139000 // TraesCS4D02G006100 // TraesCS2D02G199900 // TraesCS2A02G187800 // TraesCS7D02G368000 // TraesCS6B02G116400 // TraesCS3B02G156600 // TraesCS6B02G368700 // TraesCS3D02G139300 // TraesCS7B02G272900 // TraesCS7A02G354800 // TraesCS6A02G338000 // TraesCS2B02G219300
GO:0010467	P	gene expression	15	19	19933	85761	4.6e-07	5.2e-06	// TraesCS6D02G318800 // TraesCS6A02G085800 // TraesCS3A02G139000 // TraesCS4D02G006100 // TraesCS2D02G199900 // TraesCS2A02G187800 // TraesCS7D02G368000 // TraesCS6B02G116400 // TraesCS3B02G156600 // TraesCS6B02G368700 // TraesCS3D02G139300 // TraesCS7B02G272900 // TraesCS7A02G354800 // TraesCS6A02G338000 // TraesCS2B02G219300
GO:0034645	P	cellular macromolecule biosynthetic process	15	19	20349	85761	6.1e-07	6.8e-06	// TraesCS6D02G318800 // TraesCS6A02G085800 // TraesCS3A02G139000 // TraesCS4D02G006100 // TraesCS2D02G199900 // TraesCS2A02G187800 // TraesCS7D02G368000 // TraesCS6B02G116400 // TraesCS3B02G156600 // TraesCS6B02G368700 // TraesCS3D02G139300 // TraesCS7B02G272900 // TraesCS7A02G354800 // TraesCS6A02G338000 // TraesCS2B02G219300
GO:0009059	P	macromolecule biosynthetic process	15	19	20720	85761	7.8e-07	8.5e-06	// TraesCS6D02G318800 // TraesCS6A02G085800 // TraesCS3A02G139000 // TraesCS4D02G006100 // TraesCS2D02G199900 // TraesCS2A02G187800 // TraesCS7D02G368000 // TraesCS6B02G116400 // TraesCS3B02G156600 // TraesCS6B02G368700 // TraesCS3D02G139300 // TraesCS7B02G272900 // TraesCS7A02G354800 // TraesCS6A02G338000 // TraesCS2B02G219300
GO:0070887	P	cellular response to chemical stimulus	12	19	11665	85761	8e-07	8.5e-06	// TraesCS2D02G199900 // TraesCS6D02G318800 // TraesCS3A02G139000 // TraesCS2A02G187800 // TraesCS7D02G368000 // TraesCS3B02G156600 // TraesCS6B02G368700 // TraesCS3D02G139300 // TraesCS7B02G272900 // TraesCS7A02G354800 // TraesCS6A02G338000 // TraesCS2B02G219300
GO:0009414	P	response to water deprivation	9	19	5861	85761	1.6e-06	1.7e-05	// TraesCS6D02G318800 // TraesCS3A02G139000 // TraesCS7D02G368000 // TraesCS3B02G156600 // TraesCS6B02G368700 // TraesCS3D02G139300 // TraesCS7B02G272900 // TraesCS7A02G354800 // TraesCS6A02G338000
GO:0009415	P	response to water	9	19	5912	85761	1.7e-06	1.8e-05	// TraesCS6D02G318800 // TraesCS3A02G139000 // TraesCS7D02G368000 // TraesCS3B02G156600 // TraesCS6B02G368700 // TraesCS3D02G139300 // TraesCS7B02G272900 // TraesCS7A02G354800 // TraesCS6A02G338000
GO:0006139	P	nucleobase-containing compound metabolic process	15	19	22725	85761	2.8e-06	2.8e-05	// TraesCS6D02G318800 // TraesCS6A02G085800 // TraesCS3A02G139000 // TraesCS4D02G006100 // TraesCS2D02G199900 // TraesCS2A02G187800 // TraesCS7D02G368000 // TraesCS6B02G116400 // TraesCS3B02G156600 // TraesCS6B02G368700 // TraesCS3D02G139300 // TraesCS7B02G272900 // TraesCS7A02G354800 // TraesCS6A02G338000 // TraesCS2B02G219300
GO:0007165	P	signal transduction	12	19	13882	85761	5.3e-06	5.2e-05	// TraesCS2D02G199900 // TraesCS6D02G318800 // TraesCS3A02G139000 // TraesCS2A02G187800 // TraesCS7D02G368000 // TraesCS3B02G156600 // TraesCS6B02G368700 // TraesCS3D02G139300 // TraesCS7B02G272900 // TraesCS7A02G354800 // TraesCS6A02G338000 // TraesCS2B02G219300
GO:0009651	P	response to salt stress	9	19	6845	85761	5.8e-06	5.5e-05	// TraesCS6D02G318800 // TraesCS3A02G139000 // TraesCS7D02G368000 // TraesCS3B02G156600 // TraesCS6B02G368700 // TraesCS3D02G139300 // TraesCS7B02G272900 // TraesCS7A02G354800 // TraesCS6A02G338000
GO:0009737	P	response to abscisic acid	9	19	6841	85761	5.8e-06	5.5e-05	// TraesCS6D02G318800 // TraesCS3A02G139000 // TraesCS7D02G368000 // TraesCS3B02G156600 // TraesCS6B02G368700 // TraesCS3D02G139300 // TraesCS7B02G272900 // TraesCS7A02G354800 // TraesCS6A02G338000
GO:0097305	P	response to alcohol	9	19	6873	85761	6e-06	5.6e-05	// TraesCS6D02G318800 // TraesCS3A02G139000 // TraesCS7D02G368000 // TraesCS3B02G156600 // TraesCS6B02G368700 // TraesCS3D02G139300 // TraesCS7B02G272900 // TraesCS7A02G354800 // TraesCS6A02G338000
GO:0044700	P	single organism signaling	12	19	14083	85761	6.2e-06	5.6e-05	// TraesCS2D02G199900 // TraesCS6D02G318800 // TraesCS3A02G139000 // TraesCS2A02G187800 // TraesCS7D02G368000 // TraesCS3B02G156600 // TraesCS6B02G368700 // TraesCS3D02G139300 // TraesCS7B02G272900 // TraesCS7A02G354800 // TraesCS6A02G338000 // TraesCS2B02G219300
GO:0023052	P	signaling	12	19	14095	85761	6.2e-06	5.6e-05	// TraesCS2D02G199900 // TraesCS6D02G318800 // TraesCS3A02G139000 // TraesCS2A02G187800 // TraesCS7D02G368000 // TraesCS3B02G156600 // TraesCS6B02G368700 // TraesCS3D02G139300 // TraesCS7B02G272900 // TraesCS7A02G354800 // TraesCS6A02G338000 // TraesCS2B02G219300
GO:0009725	P	response to hormone	12	19	14710	85761	9.9e-06	8.7e-05	// TraesCS2D02G199900 // TraesCS6D02G318800 // TraesCS3A02G139000 // TraesCS2A02G187800 // TraesCS7D02G368000 // TraesCS3B02G156600 // TraesCS6B02G368700 // TraesCS3D02G139300 // TraesCS7B02G272900 // TraesCS7A02G354800 // TraesCS6A02G338000 // TraesCS2B02G219300
GO:0006970	P	response to osmotic stress	9	19	7369	85761	1.1e-05	9.2e-05	// TraesCS6D02G318800 // TraesCS3A02G139000 // TraesCS7D02G368000 // TraesCS3B02G156600 // TraesCS6B02G368700 // TraesCS3D02G139300 // TraesCS7B02G272900 // TraesCS7A02G354800 // TraesCS6A02G338000
GO:0046483	P	heterocycle metabolic process	15	19	25227	85761	1.1e-05	9.8e-05	// TraesCS6D02G318800 // TraesCS6A02G085800 // TraesCS3A02G139000 // TraesCS4D02G006100 // TraesCS2D02G199900 // TraesCS2A02G187800 // TraesCS7D02G368000 // TraesCS6B02G116400 // TraesCS3B02G156600 // TraesCS6B02G368700 // TraesCS3D02G139300 // TraesCS7B02G272900 // TraesCS7A02G354800 // TraesCS6A02G338000 // TraesCS2B02G219300
GO:0009719	P	response to endogenous stimulus	12	19	15578	85761	1.8e-05	0.00015	// TraesCS2D02G199900 // TraesCS6D02G318800 // TraesCS3A02G139000 // TraesCS2A02G187800 // TraesCS7D02G368000 // TraesCS3B02G156600 // TraesCS6B02G368700 // TraesCS3D02G139300 // TraesCS7B02G272900 // TraesCS7A02G354800 // TraesCS6A02G338000 // TraesCS2B02G219300
GO:0007154	P	cell communication	12	19	15984	85761	2.4e-05	0.0002	// TraesCS2D02G199900 // TraesCS6D02G318800 // TraesCS3A02G139000 // TraesCS2A02G187800 // TraesCS7D02G368000 // TraesCS3B02G156600 // TraesCS6B02G368700 // TraesCS3D02G139300 // TraesCS7B02G272900 // TraesCS7A02G354800 // TraesCS6A02G338000 // TraesCS2B02G219300
GO:0006725	P	cellular aromatic compound metabolic process	15	19	26836	85761	2.6e-05	0.00021	// TraesCS6D02G318800 // TraesCS6A02G085800 // TraesCS3A02G139000 // TraesCS4D02G006100 // TraesCS2D02G199900 // TraesCS2A02G187800 // TraesCS7D02G368000 // TraesCS6B02G116400 // TraesCS3B02G156600 // TraesCS6B02G368700 // TraesCS3D02G139300 // TraesCS7B02G272900 // TraesCS7A02G354800 // TraesCS6A02G338000 // TraesCS2B02G219300
GO:0034641	P	cellular nitrogen compound metabolic process	15	19	27157	85761	3.1e-05	0.00025	// TraesCS6D02G318800 // TraesCS6A02G085800 // TraesCS3A02G139000 // TraesCS4D02G006100 // TraesCS2D02G199900 // TraesCS2A02G187800 // TraesCS7D02G368000 // TraesCS6B02G116400 // TraesCS3B02G156600 // TraesCS6B02G368700 // TraesCS3D02G139300 // TraesCS7B02G272900 // TraesCS7A02G354800 // TraesCS6A02G338000 // TraesCS2B02G219300
GO:1901360	P	organic cyclic compound metabolic process	15	19	27558	85761	3.7e-05	0.00029	// TraesCS6D02G318800 // TraesCS6A02G085800 // TraesCS3A02G139000 // TraesCS4D02G006100 // TraesCS2D02G199900 // TraesCS2A02G187800 // TraesCS7D02G368000 // TraesCS6B02G116400 // TraesCS3B02G156600 // TraesCS6B02G368700 // TraesCS3D02G139300 // TraesCS7B02G272900 // TraesCS7A02G354800 // TraesCS6A02G338000 // TraesCS2B02G219300
GO:0050794	P	regulation of cellular process	15	19	27690	85761	4e-05	0.00031	// TraesCS6D02G318800 // TraesCS6A02G085800 // TraesCS3A02G139000 // TraesCS4D02G006100 // TraesCS2D02G199900 // TraesCS2A02G187800 // TraesCS7D02G368000 // TraesCS6B02G116400 // TraesCS3B02G156600 // TraesCS6B02G368700 // TraesCS3D02G139300 // TraesCS7B02G272900 // TraesCS7A02G354800 // TraesCS6A02G338000 // TraesCS2B02G219300
GO:1901700	P	response to oxygen-containing compound	12	19	17327	85761	5.5e-05	0.00042	// TraesCS2D02G199900 // TraesCS6D02G318800 // TraesCS3A02G139000 // TraesCS2A02G187800 // TraesCS7D02G368000 // TraesCS3B02G156600 // TraesCS6B02G368700 // TraesCS3D02G139300 // TraesCS7B02G272900 // TraesCS7A02G354800 // TraesCS6A02G338000 // TraesCS2B02G219300
GO:0006807	P	nitrogen compound metabolic process	15	19	29364	85761	8.6e-05	0.00065	// TraesCS6D02G318800 // TraesCS6A02G085800 // TraesCS3A02G139000 // TraesCS4D02G006100 // TraesCS2D02G199900 // TraesCS2A02G187800 // TraesCS7D02G368000 // TraesCS6B02G116400 // TraesCS3B02G156600 // TraesCS6B02G368700 // TraesCS3D02G139300 // TraesCS7B02G272900 // TraesCS7A02G354800 // TraesCS6A02G338000 // TraesCS2B02G219300
GO:0010033	P	response to organic substance	12	19	18902	85761	0.00014	0.001	// TraesCS2D02G199900 // TraesCS6D02G318800 // TraesCS3A02G139000 // TraesCS2A02G187800 // TraesCS7D02G368000 // TraesCS3B02G156600 // TraesCS6B02G368700 // TraesCS3D02G139300 // TraesCS7B02G272900 // TraesCS7A02G354800 // TraesCS6A02G338000 // TraesCS2B02G219300
GO:0050789	P	regulation of biological process	15	19	30871	85761	0.00017	0.0012	// TraesCS6D02G318800 // TraesCS6A02G085800 // TraesCS3A02G139000 // TraesCS4D02G006100 // TraesCS2D02G199900 // TraesCS2A02G187800 // TraesCS7D02G368000 // TraesCS6B02G116400 // TraesCS3B02G156600 // TraesCS6B02G368700 // TraesCS3D02G139300 // TraesCS7B02G272900 // TraesCS7A02G354800 // TraesCS6A02G338000 // TraesCS2B02G219300
GO:0044249	P	cellular biosynthetic process	15	19	30853	85761	0.00016	0.0012	// TraesCS6D02G318800 // TraesCS6A02G085800 // TraesCS3A02G139000 // TraesCS4D02G006100 // TraesCS2D02G199900 // TraesCS2A02G187800 // TraesCS7D02G368000 // TraesCS6B02G116400 // TraesCS3B02G156600 // TraesCS6B02G368700 // TraesCS3D02G139300 // TraesCS7B02G272900 // TraesCS7A02G354800 // TraesCS6A02G338000 // TraesCS2B02G219300
GO:1901576	P	organic substance biosynthetic process	15	19	31446	85761	0.00021	0.0015	// TraesCS6D02G318800 // TraesCS6A02G085800 // TraesCS3A02G139000 // TraesCS4D02G006100 // TraesCS2D02G199900 // TraesCS2A02G187800 // TraesCS7D02G368000 // TraesCS6B02G116400 // TraesCS3B02G156600 // TraesCS6B02G368700 // TraesCS3D02G139300 // TraesCS7B02G272900 // TraesCS7A02G354800 // TraesCS6A02G338000 // TraesCS2B02G219300
GO:0010035	P	response to inorganic substance	9	19	10992	85761	0.00026	0.0018	// TraesCS6D02G318800 // TraesCS3A02G139000 // TraesCS7D02G368000 // TraesCS3B02G156600 // TraesCS6B02G368700 // TraesCS3D02G139300 // TraesCS7B02G272900 // TraesCS7A02G354800 // TraesCS6A02G338000
GO:0051716	P	cellular response to stimulus	12	19	20324	85761	0.00028	0.002	// TraesCS2D02G199900 // TraesCS6D02G318800 // TraesCS3A02G139000 // TraesCS2A02G187800 // TraesCS7D02G368000 // TraesCS3B02G156600 // TraesCS6B02G368700 // TraesCS3D02G139300 // TraesCS7B02G272900 // TraesCS7A02G354800 // TraesCS6A02G338000 // TraesCS2B02G219300
GO:0009058	P	biosynthetic process	15	19	32675	85761	0.00035	0.0023	// TraesCS6D02G318800 // TraesCS6A02G085800 // TraesCS3A02G139000 // TraesCS4D02G006100 // TraesCS2D02G199900 // TraesCS2A02G187800 // TraesCS7D02G368000 // TraesCS6B02G116400 // TraesCS3B02G156600 // TraesCS6B02G368700 // TraesCS3D02G139300 // TraesCS7B02G272900 // TraesCS7A02G354800 // TraesCS6A02G338000 // TraesCS2B02G219300
GO:0043170	P	macromolecule metabolic process	16	19	38931	85761	0.0006	0.004	// TraesCS6D02G318800 // TraesCS6A02G085800 // TraesCS3A02G139000 // TraesCS4D02G006100 // TraesCS2D02G199900 // TraesCS2A02G187800 // TraesCS7D02G368000 // TraesCS6B02G116400 // TraesCS3B02G156600 // TraesCS6B02G368700 // TraesCS3D02G139300 // TraesCS4B02G009900 // TraesCS7B02G272900 // TraesCS7A02G354800 // TraesCS6A02G338000 // TraesCS2B02G219300
GO:0065007	P	biological regulation	15	19	35465	85761	0.00097	0.0064	// TraesCS6D02G318800 // TraesCS6A02G085800 // TraesCS3A02G139000 // TraesCS4D02G006100 // TraesCS2D02G199900 // TraesCS2A02G187800 // TraesCS7D02G368000 // TraesCS6B02G116400 // TraesCS3B02G156600 // TraesCS6B02G368700 // TraesCS3D02G139300 // TraesCS7B02G272900 // TraesCS7A02G354800 // TraesCS6A02G338000 // TraesCS2B02G219300
GO:0001101	P	response to acid chemical	9	19	13354	85761	0.0011	0.0072	// TraesCS6D02G318800 // TraesCS3A02G139000 // TraesCS7D02G368000 // TraesCS3B02G156600 // TraesCS6B02G368700 // TraesCS3D02G139300 // TraesCS7B02G272900 // TraesCS7A02G354800 // TraesCS6A02G338000
GO:0042221	P	response to chemical	12	19	23546	85761	0.0012	0.0078	// TraesCS2D02G199900 // TraesCS6D02G318800 // TraesCS3A02G139000 // TraesCS2A02G187800 // TraesCS7D02G368000 // TraesCS3B02G156600 // TraesCS6B02G368700 // TraesCS3D02G139300 // TraesCS7B02G272900 // TraesCS7A02G354800 // TraesCS6A02G338000 // TraesCS2B02G219300
GO:0044260	P	cellular macromolecule metabolic process	15	19	36166	85761	0.0012	0.0079	// TraesCS6D02G318800 // TraesCS6A02G085800 // TraesCS3A02G139000 // TraesCS4D02G006100 // TraesCS2D02G199900 // TraesCS2A02G187800 // TraesCS7D02G368000 // TraesCS6B02G116400 // TraesCS3B02G156600 // TraesCS6B02G368700 // TraesCS3D02G139300 // TraesCS7B02G272900 // TraesCS7A02G354800 // TraesCS6A02G338000 // TraesCS2B02G219300
GO:0006950	P	response to stress	13	19	29274	85761	0.0024	0.015	// TraesCS2D02G199900 // TraesCS6D02G318800 // TraesCS3A02G139000 // TraesCS4D02G006100 // TraesCS2A02G187800 // TraesCS7D02G368000 // TraesCS3B02G156600 // TraesCS6B02G368700 // TraesCS3D02G139300 // TraesCS7B02G272900 // TraesCS7A02G354800 // TraesCS6A02G338000 // TraesCS2B02G219300
GO:0009628	P	response to abiotic stimulus	10	19	21261	85761	0.0084	0.052	// TraesCS6D02G318800 // TraesCS3A02G139000 // TraesCS4D02G006100 // TraesCS7D02G368000 // TraesCS3B02G156600 // TraesCS6B02G368700 // TraesCS3D02G139300 // TraesCS7B02G272900 // TraesCS7A02G354800 // TraesCS6A02G338000
GO:0044238	P	primary metabolic process	16	19	47561	85761	0.0086	0.052	// TraesCS6D02G318800 // TraesCS6A02G085800 // TraesCS3A02G139000 // TraesCS4D02G006100 // TraesCS2D02G199900 // TraesCS2A02G187800 // TraesCS7D02G368000 // TraesCS6B02G116400 // TraesCS3B02G156600 // TraesCS6B02G368700 // TraesCS3D02G139300 // TraesCS4B02G009900 // TraesCS7B02G272900 // TraesCS7A02G354800 // TraesCS6A02G338000 // TraesCS2B02G219300
GO:0048367	P	shoot system development	6	19	8919	85761	0.01	0.063	// TraesCS2D02G199900 // TraesCS6A02G085800 // TraesCS2A02G187800 // TraesCS6B02G116400 // TraesCS2B02G219300 // TraesCS4D02G006100
GO:0071704	P	organic substance metabolic process	16	19	51371	85761	0.023	0.13	// TraesCS6D02G318800 // TraesCS6A02G085800 // TraesCS3A02G139000 // TraesCS4D02G006100 // TraesCS2D02G199900 // TraesCS2A02G187800 // TraesCS7D02G368000 // TraesCS6B02G116400 // TraesCS3B02G156600 // TraesCS6B02G368700 // TraesCS3D02G139300 // TraesCS4B02G009900 // TraesCS7B02G272900 // TraesCS7A02G354800 // TraesCS6A02G338000 // TraesCS2B02G219300
GO:0050896	P	response to stimulus	13	19	39029	85761	0.038	0.22	// TraesCS2D02G199900 // TraesCS6D02G318800 // TraesCS3A02G139000 // TraesCS4D02G006100 // TraesCS2A02G187800 // TraesCS7D02G368000 // TraesCS3B02G156600 // TraesCS6B02G368700 // TraesCS3D02G139300 // TraesCS7B02G272900 // TraesCS7A02G354800 // TraesCS6A02G338000 // TraesCS2B02G219300
GO:0044237	P	cellular metabolic process	15	19	49214	85761	0.044	0.26	// TraesCS6D02G318800 // TraesCS6A02G085800 // TraesCS3A02G139000 // TraesCS4D02G006100 // TraesCS2D02G199900 // TraesCS2A02G187800 // TraesCS7D02G368000 // TraesCS6B02G116400 // TraesCS3B02G156600 // TraesCS6B02G368700 // TraesCS3D02G139300 // TraesCS7B02G272900 // TraesCS7A02G354800 // TraesCS6A02G338000 // TraesCS2B02G219300
GO:0044699	P	single-organism process	15	19	50975	85761	0.063	0.36	// TraesCS6D02G318800 // TraesCS6A02G085800 // TraesCS3A02G139000 // TraesCS4D02G006100 // TraesCS2D02G199900 // TraesCS2A02G187800 // TraesCS7D02G368000 // TraesCS6B02G116400 // TraesCS3B02G156600 // TraesCS6B02G368700 // TraesCS3D02G139300 // TraesCS7B02G272900 // TraesCS7A02G354800 // TraesCS6A02G338000 // TraesCS2B02G219300
GO:0008152	P	metabolic process	16	19	57664	85761	0.086	0.49	// TraesCS6D02G318800 // TraesCS6A02G085800 // TraesCS3A02G139000 // TraesCS4D02G006100 // TraesCS2D02G199900 // TraesCS2A02G187800 // TraesCS7D02G368000 // TraesCS6B02G116400 // TraesCS3B02G156600 // TraesCS6B02G368700 // TraesCS3D02G139300 // TraesCS4B02G009900 // TraesCS7B02G272900 // TraesCS7A02G354800 // TraesCS6A02G338000 // TraesCS2B02G219300
GO:0044763	P	single-organism cellular process	12	19	40376	85761	0.12	0.67	// TraesCS2D02G199900 // TraesCS6D02G318800 // TraesCS3A02G139000 // TraesCS2A02G187800 // TraesCS7D02G368000 // TraesCS3B02G156600 // TraesCS6B02G368700 // TraesCS3D02G139300 // TraesCS7B02G272900 // TraesCS7A02G354800 // TraesCS6A02G338000 // TraesCS2B02G219300
GO:0048731	P	system development	6	19	16520	85761	0.14	0.79	// TraesCS2D02G199900 // TraesCS6A02G085800 // TraesCS2A02G187800 // TraesCS6B02G116400 // TraesCS2B02G219300 // TraesCS4D02G006100
GO:0044707	P	single-multicellular organism process	6	19	23276	85761	0.41	1	// TraesCS2D02G199900 // TraesCS6A02G085800 // TraesCS2A02G187800 // TraesCS6B02G116400 // TraesCS2B02G219300 // TraesCS4D02G006100
GO:0032501	P	multicellular organismal process	6	19	24629	85761	0.48	1	// TraesCS2D02G199900 // TraesCS6A02G085800 // TraesCS2A02G187800 // TraesCS6B02G116400 // TraesCS2B02G219300 // TraesCS4D02G006100
GO:0009987	P	cellular process	15	19	58786	85761	0.24	1	// TraesCS6D02G318800 // TraesCS6A02G085800 // TraesCS3A02G139000 // TraesCS4D02G006100 // TraesCS2D02G199900 // TraesCS2A02G187800 // TraesCS7D02G368000 // TraesCS6B02G116400 // TraesCS3B02G156600 // TraesCS6B02G368700 // TraesCS3D02G139300 // TraesCS7B02G272900 // TraesCS7A02G354800 // TraesCS6A02G338000 // TraesCS2B02G219300
GO:0032502	P	developmental process	6	19	23141	85761	0.41	1	// TraesCS2D02G199900 // TraesCS6A02G085800 // TraesCS2A02G187800 // TraesCS6B02G116400 // TraesCS2B02G219300 // TraesCS4D02G006100
GO:0007275	P	multicellular organism development	6	19	20549	85761	0.29	1	// TraesCS2D02G199900 // TraesCS6A02G085800 // TraesCS2A02G187800 // TraesCS6B02G116400 // TraesCS2B02G219300 // TraesCS4D02G006100
GO:0044767	P	single-organism developmental process	6	19	22628	85761	0.39	1	// TraesCS2D02G199900 // TraesCS6A02G085800 // TraesCS2A02G187800 // TraesCS6B02G116400 // TraesCS2B02G219300 // TraesCS4D02G006100
GO:0048856	P	anatomical structure development	6	19	22911	85761	0.4	1	// TraesCS2D02G199900 // TraesCS6A02G085800 // TraesCS2A02G187800 // TraesCS6B02G116400 // TraesCS2B02G219300 // TraesCS4D02G006100
GO:0001071	F	nucleic acid binding transcription factor activity	15	19	6007	85761	1.4e-14	1.8e-13	// TraesCS6D02G318800 // TraesCS6A02G085800 // TraesCS3A02G139000 // TraesCS4D02G006100 // TraesCS2D02G199900 // TraesCS2A02G187800 // TraesCS7D02G368000 // TraesCS6B02G116400 // TraesCS3B02G156600 // TraesCS6B02G368700 // TraesCS3D02G139300 // TraesCS7B02G272900 // TraesCS7A02G354800 // TraesCS6A02G338000 // TraesCS2B02G219300
GO:0003700	F	transcription factor activity, sequence-specific DNA binding	15	19	6006	85761	1.4e-14	1.8e-13	// TraesCS6D02G318800 // TraesCS6A02G085800 // TraesCS3A02G139000 // TraesCS4D02G006100 // TraesCS2D02G199900 // TraesCS2A02G187800 // TraesCS7D02G368000 // TraesCS6B02G116400 // TraesCS3B02G156600 // TraesCS6B02G368700 // TraesCS3D02G139300 // TraesCS7B02G272900 // TraesCS7A02G354800 // TraesCS6A02G338000 // TraesCS2B02G219300
GO:0003677	F	DNA binding	12	19	10994	85761	4.1e-07	3.5e-06	// TraesCS2D02G199900 // TraesCS6D02G318800 // TraesCS3A02G139000 // TraesCS2A02G187800 // TraesCS7D02G368000 // TraesCS3B02G156600 // TraesCS6B02G368700 // TraesCS3D02G139300 // TraesCS7B02G272900 // TraesCS7A02G354800 // TraesCS6A02G338000 // TraesCS2B02G219300
GO:0003676	F	nucleic acid binding	12	19	16166	85761	2.7e-05	0.00017	// TraesCS2D02G199900 // TraesCS6D02G318800 // TraesCS3A02G139000 // TraesCS2A02G187800 // TraesCS7D02G368000 // TraesCS3B02G156600 // TraesCS6B02G368700 // TraesCS3D02G139300 // TraesCS7B02G272900 // TraesCS7A02G354800 // TraesCS6A02G338000 // TraesCS2B02G219300
GO:0004871	F	signal transducer activity	6	19	5132	85761	0.00063	0.0032	// TraesCS6D02G318800 // TraesCS3A02G139000 // TraesCS3B02G156600 // TraesCS6B02G368700 // TraesCS3D02G139300 // TraesCS6A02G338000
GO:1901363	F	heterocyclic compound binding	12	19	32889	85761	0.025	0.092	// TraesCS2D02G199900 // TraesCS6D02G318800 // TraesCS3A02G139000 // TraesCS2A02G187800 // TraesCS7D02G368000 // TraesCS3B02G156600 // TraesCS6B02G368700 // TraesCS3D02G139300 // TraesCS7B02G272900 // TraesCS7A02G354800 // TraesCS6A02G338000 // TraesCS2B02G219300
GO:0097159	F	organic cyclic compound binding	12	19	32929	85761	0.025	0.092	// TraesCS2D02G199900 // TraesCS6D02G318800 // TraesCS3A02G139000 // TraesCS2A02G187800 // TraesCS7D02G368000 // TraesCS3B02G156600 // TraesCS6B02G368700 // TraesCS3D02G139300 // TraesCS7B02G272900 // TraesCS7A02G354800 // TraesCS6A02G338000 // TraesCS2B02G219300
GO:0005488	F	binding	14	19	58931	85761	0.43	1	// TraesCS6D02G318800 // TraesCS6A02G085800 // TraesCS3A02G139000 // TraesCS2D02G199900 // TraesCS2A02G187800 // TraesCS7D02G368000 // TraesCS6B02G116400 // TraesCS3B02G156600 // TraesCS6B02G368700 // TraesCS3D02G139300 // TraesCS7B02G272900 // TraesCS7A02G354800 // TraesCS6A02G338000 // TraesCS2B02G219300
GO:0005515	F	protein binding	6	19	31444	85761	0.75	1	// TraesCS2D02G199900 // TraesCS3A02G139000 // TraesCS2A02G187800 // TraesCS3B02G156600 // TraesCS3D02G139300 // TraesCS2B02G219300
GO:0005634	C	nucleus	15	19	29056	85761	7.5e-05	0.0025	// TraesCS6D02G318800 // TraesCS6A02G085800 // TraesCS3A02G139000 // TraesCS4D02G006100 // TraesCS2D02G199900 // TraesCS2A02G187800 // TraesCS7D02G368000 // TraesCS6B02G116400 // TraesCS3B02G156600 // TraesCS6B02G368700 // TraesCS3D02G139300 // TraesCS7B02G272900 // TraesCS7A02G354800 // TraesCS6A02G338000 // TraesCS2B02G219300
GO:0043231	C	intracellular membrane-bounded organelle	18	19	54543	85761	0.0022	0.021	// TraesCS3A02G123500 // TraesCS3B02G142600 // TraesCS2D02G199900 // TraesCS6D02G318800 // TraesCS3A02G139000 // TraesCS4D02G006100 // TraesCS3D02G125100 // TraesCS2A02G187800 // TraesCS7D02G368000 // TraesCS6A02G085800 // TraesCS6B02G116400 // TraesCS3B02G156600 // TraesCS6B02G368700 // TraesCS3D02G139300 // TraesCS7B02G272900 // TraesCS7A02G354800 // TraesCS6A02G338000 // TraesCS2B02G219300
GO:0043229	C	intracellular organelle	18	19	55574	85761	0.003	0.021	// TraesCS3A02G123500 // TraesCS3B02G142600 // TraesCS2D02G199900 // TraesCS6D02G318800 // TraesCS3A02G139000 // TraesCS4D02G006100 // TraesCS3D02G125100 // TraesCS2A02G187800 // TraesCS7D02G368000 // TraesCS6A02G085800 // TraesCS6B02G116400 // TraesCS3B02G156600 // TraesCS6B02G368700 // TraesCS3D02G139300 // TraesCS7B02G272900 // TraesCS7A02G354800 // TraesCS6A02G338000 // TraesCS2B02G219300
GO:0043227	C	membrane-bounded organelle	18	19	54652	85761	0.0023	0.021	// TraesCS3A02G123500 // TraesCS3B02G142600 // TraesCS2D02G199900 // TraesCS6D02G318800 // TraesCS3A02G139000 // TraesCS4D02G006100 // TraesCS3D02G125100 // TraesCS2A02G187800 // TraesCS7D02G368000 // TraesCS6A02G085800 // TraesCS6B02G116400 // TraesCS3B02G156600 // TraesCS6B02G368700 // TraesCS3D02G139300 // TraesCS7B02G272900 // TraesCS7A02G354800 // TraesCS6A02G338000 // TraesCS2B02G219300
GO:0043226	C	organelle	18	19	55713	85761	0.0031	0.021	// TraesCS3A02G123500 // TraesCS3B02G142600 // TraesCS2D02G199900 // TraesCS6D02G318800 // TraesCS3A02G139000 // TraesCS4D02G006100 // TraesCS3D02G125100 // TraesCS2A02G187800 // TraesCS7D02G368000 // TraesCS6A02G085800 // TraesCS6B02G116400 // TraesCS3B02G156600 // TraesCS6B02G368700 // TraesCS3D02G139300 // TraesCS7B02G272900 // TraesCS7A02G354800 // TraesCS6A02G338000 // TraesCS2B02G219300
GO:0044424	C	intracellular part	18	19	60136	85761	0.011	0.056	// TraesCS3A02G123500 // TraesCS3B02G142600 // TraesCS2D02G199900 // TraesCS6D02G318800 // TraesCS3A02G139000 // TraesCS4D02G006100 // TraesCS3D02G125100 // TraesCS2A02G187800 // TraesCS7D02G368000 // TraesCS6A02G085800 // TraesCS6B02G116400 // TraesCS3B02G156600 // TraesCS6B02G368700 // TraesCS3D02G139300 // TraesCS7B02G272900 // TraesCS7A02G354800 // TraesCS6A02G338000 // TraesCS2B02G219300
GO:0005622	C	intracellular	18	19	60496	85761	0.012	0.056	// TraesCS3A02G123500 // TraesCS3B02G142600 // TraesCS2D02G199900 // TraesCS6D02G318800 // TraesCS3A02G139000 // TraesCS4D02G006100 // TraesCS3D02G125100 // TraesCS2A02G187800 // TraesCS7D02G368000 // TraesCS6A02G085800 // TraesCS6B02G116400 // TraesCS3B02G156600 // TraesCS6B02G368700 // TraesCS3D02G139300 // TraesCS7B02G272900 // TraesCS7A02G354800 // TraesCS6A02G338000 // TraesCS2B02G219300
GO:0044464	C	cell part	18	19	65148	85761	0.038	0.14	// TraesCS3A02G123500 // TraesCS3B02G142600 // TraesCS2D02G199900 // TraesCS6D02G318800 // TraesCS3A02G139000 // TraesCS4D02G006100 // TraesCS3D02G125100 // TraesCS2A02G187800 // TraesCS7D02G368000 // TraesCS6A02G085800 // TraesCS6B02G116400 // TraesCS3B02G156600 // TraesCS6B02G368700 // TraesCS3D02G139300 // TraesCS7B02G272900 // TraesCS7A02G354800 // TraesCS6A02G338000 // TraesCS2B02G219300
GO:0005623	C	cell	18	19	65175	85761	0.038	0.14	// TraesCS3A02G123500 // TraesCS3B02G142600 // TraesCS2D02G199900 // TraesCS6D02G318800 // TraesCS3A02G139000 // TraesCS4D02G006100 // TraesCS3D02G125100 // TraesCS2A02G187800 // TraesCS7D02G368000 // TraesCS6A02G085800 // TraesCS6B02G116400 // TraesCS3B02G156600 // TraesCS6B02G368700 // TraesCS3D02G139300 // TraesCS7B02G272900 // TraesCS7A02G354800 // TraesCS6A02G338000 // TraesCS2B02G219300
GO:0005737	C	cytoplasm	9	19	47682	85761	0.83	1	// TraesCS3A02G123500 // TraesCS3B02G142600 // TraesCS2D02G199900 // TraesCS6A02G085800 // TraesCS2A02G187800 // TraesCS3D02G125100 // TraesCS6B02G116400 // TraesCS4D02G006100 // TraesCS2B02G219300
GO:0044444	C	cytoplasmic part	7	19	40994	85761	0.88	1	// TraesCS3A02G123500 // TraesCS3B02G142600 // TraesCS2D02G199900 // TraesCS2A02G187800 // TraesCS3D02G125100 // TraesCS4D02G006100 // TraesCS2B02G219300
