# Supplementary material for: Genome-Wide Identification and Characterization of the Brassinazole-resistant (BZR) Gene Family and Its Expression in the Various Developmental Stage and Stress Conditions in Wheat (Triticum aestivum L.)
Source: Int J Mol Sci. 2021 Aug 14;22(16):8743. doi: 10.3390/ijms22168743 (PMC8395832; doi:10.3390/ijms22168743)
Supplement: Supplementary file 1 [file ijms-22-08743-s001.zip › Table S8.xls]

## Sheet: Sheet1
Table S8. TaBZR gene annotation using eggNOGmapper.
Gene Name	Seed ortholog	e-value	Score	GO terms	KEGG pathways	KEGG KO	eggNOG Ogs	Best OG	Description
TaBZR1.1	4565.Traes_2BS_31BB97552.1	2e-124	452.2	GO:0003674,GO:0003700,GO:0005575,GO:0005622,GO:0005623,GO:0005634,GO:0005737,GO:0005773,GO:0006355,GO:0008150,GO:0009719,GO:0009725,GO:0009741,GO:0009889,GO:0010033,GO:0010468,GO:0010556,GO:0014070,GO:0019219,GO:0019222,GO:0031323,GO:0031326,GO:0033993,GO:0042221,GO:0043226,GO:0043227,GO:0043229,GO:0043231,GO:0044424,GO:0044444,GO:0044464,GO:0050789,GO:0050794,GO:0050896,GO:0051171,GO:0051252,GO:…	ko04075,map04075	ko:K14503	2CMUQ@1,2QS1Z@2759,37JTJ@33090,3G984@35493,3I9SR@38820,3KY06@4447	NA|NA|NA	BES1/BZR1 plant transcription factor, N-terminal
TaBZR1.2	4565.Traes_2BS_31BB97552.1	3.9e-125	454.5	GO:0003674,GO:0003700,GO:0005575,GO:0005622,GO:0005623,GO:0005634,GO:0005737,GO:0005773,GO:0006355,GO:0008150,GO:0009719,GO:0009725,GO:0009741,GO:0009889,GO:0010033,GO:0010468,GO:0010556,GO:0014070,GO:0019219,GO:0019222,GO:0031323,GO:0031326,GO:0033993,GO:0042221,GO:0043226,GO:0043227,GO:0043229,GO:0043231,GO:0044424,GO:0044444,GO:0044464,GO:0050789,GO:0050794,GO:0050896,GO:0051171,GO:0051252,GO:…	ko04075,map04075	ko:K14503	2CMUQ@1,2QS1Z@2759,37JTJ@33090,3G984@35493,3I9SR@38820,3KY06@4447	NA|NA|NA	BES1/BZR1 plant transcription factor, N-terminal
TaBZR1.3	4565.Traes_2BS_31BB97552.1	6.7e-125	453.8	GO:0003674,GO:0003700,GO:0005575,GO:0005622,GO:0005623,GO:0005634,GO:0005737,GO:0005773,GO:0006355,GO:0008150,GO:0009719,GO:0009725,GO:0009741,GO:0009889,GO:0010033,GO:0010468,GO:0010556,GO:0014070,GO:0019219,GO:0019222,GO:0031323,GO:0031326,GO:0033993,GO:0042221,GO:0043226,GO:0043227,GO:0043229,GO:0043231,GO:0044424,GO:0044444,GO:0044464,GO:0050789,GO:0050794,GO:0050896,GO:0051171,GO:0051252,GO:…	ko04075,map04075	ko:K14503	2CMUQ@1,2QS1Z@2759,37JTJ@33090,3G984@35493,3I9SR@38820,3KY06@4447	NA|NA|NA	BES1/BZR1 plant transcription factor, N-terminal
TaBZR2.1	4572.TRIUR3_20244-P1	2.3e-48	198.7				2C5YY@1,2S4GR@2759,37WEA@33090,3GK53@35493,3IHQF@38820,3M0S1@4447	NA|NA|NA	BES1/BZR1 plant transcription factor, N-terminal
TaBZR2.2	15368.BRADI2G06400.1	1.1e-147	529.6	GO:0006355,GO:0008150,GO:0009889,GO:0010468,GO:0010556,GO:0019219,GO:0019222,GO:0031323,GO:0031326,GO:0050789,GO:0050794,GO:0051171,GO:0051252,GO:0060255,GO:0065007,GO:0080090,GO:1903506,GO:2000112,GO:2001141	ko04075,map04075	ko:K14503	2CMIA@1,2QQEG@2759,37R2U@33090,3G7XE@35493,3I8PI@38820,3KWI2@4447	NA|NA|NA	BES1/BZR1 plant transcription factor, N-terminal
TaBZR2.3	4565.Traes_3B_31C92ED65.2	7.1e-50	203.8				2C5YY@1,2S4GR@2759,37WEA@33090,3GK53@35493,3IHQF@38820,3M0S1@4447	NA|NA|NA	BES1/BZR1 plant transcription factor, N-terminal
TaBZR2.4	15368.BRADI2G06400.1	1.1e-147	529.6	GO:0006355,GO:0008150,GO:0009889,GO:0010468,GO:0010556,GO:0019219,GO:0019222,GO:0031323,GO:0031326,GO:0050789,GO:0050794,GO:0051171,GO:0051252,GO:0060255,GO:0065007,GO:0080090,GO:1903506,GO:2000112,GO:2001141	ko04075,map04075	ko:K14503	2CMIA@1,2QQEG@2759,37R2U@33090,3G7XE@35493,3I8PI@38820,3KWI2@4447	NA|NA|NA	BES1/BZR1 plant transcription factor, N-terminal
TaBZR2.5	4565.Traes_3B_31C92ED65.2	2.6e-41	175.3				2C5YY@1,2S4GR@2759,37WEA@33090,3GK53@35493,3IHQF@38820,3M0S1@4447	NA|NA|NA	BES1/BZR1 plant transcription factor, N-terminal
TaBZR2.6	15368.BRADI2G06400.1	1.1e-147	529.6	GO:0006355,GO:0008150,GO:0009889,GO:0010468,GO:0010556,GO:0019219,GO:0019222,GO:0031323,GO:0031326,GO:0050789,GO:0050794,GO:0051171,GO:0051252,GO:0060255,GO:0065007,GO:0080090,GO:1903506,GO:2000112,GO:2001141	ko04075,map04075	ko:K14503	2CMIA@1,2QQEG@2759,37R2U@33090,3G7XE@35493,3I8PI@38820,3KWI2@4447	NA|NA|NA	BES1/BZR1 plant transcription factor, N-terminal
TaBZR3.1	4572.TRIUR3_02569-P1	4.9e-264	916.8	GO:0003674,GO:0003700,GO:0003824,GO:0004553,GO:0005575,GO:0005622,GO:0005623,GO:0005634,GO:0006355,GO:0008150,GO:0009889,GO:0010468,GO:0010556,GO:0016160,GO:0016161,GO:0016787,GO:0016798,GO:0019219,GO:0019222,GO:0031323,GO:0031326,GO:0043226,GO:0043227,GO:0043229,GO:0043231,GO:0044424,GO:0044464,GO:0048831,GO:0050789,GO:0050793,GO:0050794,GO:0051171,GO:0051239,GO:0051252,GO:0060255,GO:0065007,GO:…	ko00500,map00500	ko:K01177	2CJU3@1,2QTBX@2759,37IZ0@33090,3G9FN@35493,3I3CP@38820,3KQSG@4447	NA|NA|NA	Glycosyl hydrolase family 14
TaBZR3.2	15368.BRADI4G38630.1	6.5e-290	1003	GO:0003674,GO:0003700,GO:0003824,GO:0004553,GO:0005575,GO:0005622,GO:0005623,GO:0005634,GO:0006355,GO:0008150,GO:0009889,GO:0010468,GO:0010556,GO:0016160,GO:0016161,GO:0016787,GO:0016798,GO:0019219,GO:0019222,GO:0031323,GO:0031326,GO:0043226,GO:0043227,GO:0043229,GO:0043231,GO:0044424,GO:0044464,GO:0048831,GO:0050789,GO:0050793,GO:0050794,GO:0051171,GO:0051239,GO:0051252,GO:0060255,GO:0065007,GO:…	ko00500,map00500	ko:K01177	2CJU3@1,2QTBX@2759,37IZ0@33090,3G9FN@35493,3I3CP@38820,3KQSG@4447	NA|NA|NA	Glycosyl hydrolase family 14
TaBZR4.1	4565.Traes_6AS_7B3C53009.2	0	1213	GO:0003674,GO:0003700,GO:0003824,GO:0004553,GO:0005575,GO:0005622,GO:0005623,GO:0005634,GO:0006355,GO:0008150,GO:0009889,GO:0010468,GO:0010556,GO:0016160,GO:0016161,GO:0016787,GO:0016798,GO:0019219,GO:0019222,GO:0031323,GO:0031326,GO:0043226,GO:0043227,GO:0043229,GO:0043231,GO:0044424,GO:0044464,GO:0048831,GO:0050789,GO:0050793,GO:0050794,GO:0051171,GO:0051239,GO:0051252,GO:0060255,GO:0065007,GO:…	ko00500,map00500	ko:K01177	2CJU3@1,2QW2E@2759,37MJB@33090,3G79J@35493,3I4JD@38820,3KU7I@4447	NA|NA|NA	Glycosyl hydrolase family 14
TaBZR4.2	4572.TRIUR3_06803-P1	6.2e-164	583.6				2CMIA@1,2QQEG@2759,37R2U@33090,3G7XE@35493,3IP4R@38820,3KUNQ@4447	NA|NA|NA	BES1 BZR1 homolog protein 4
TaBZR4.3	4565.Traes_6AS_7B3C53009.2	0	1184.5	GO:0003674,GO:0003700,GO:0003824,GO:0004553,GO:0005575,GO:0005622,GO:0005623,GO:0005634,GO:0006355,GO:0008150,GO:0009889,GO:0010468,GO:0010556,GO:0016160,GO:0016161,GO:0016787,GO:0016798,GO:0019219,GO:0019222,GO:0031323,GO:0031326,GO:0043226,GO:0043227,GO:0043229,GO:0043231,GO:0044424,GO:0044464,GO:0048831,GO:0050789,GO:0050793,GO:0050794,GO:0051171,GO:0051239,GO:0051252,GO:0060255,GO:0065007,GO:…	ko00500,map00500	ko:K01177	2CJU3@1,2QW2E@2759,37MJB@33090,3G79J@35493,3I4JD@38820,3KU7I@4447	NA|NA|NA	Glycosyl hydrolase family 14
TaBZR4.4	4572.TRIUR3_06803-P1	1.2e-141	509.6				2CMIA@1,2QQEG@2759,37R2U@33090,3G7XE@35493,3IP4R@38820,3KUNQ@4447	NA|NA|NA	BES1 BZR1 homolog protein 4
TaBZR4.5	4572.TRIUR3_06803-P1	1.1e-141	509.6				2CMIA@1,2QQEG@2759,37R2U@33090,3G7XE@35493,3IP4R@38820,3KUNQ@4447	NA|NA|NA	BES1 BZR1 homolog protein 4
TaBZR5.1	4572.TRIUR3_11319-P1	4.1e-158	564.3				2CMIA@1,2QQEG@2759,37R2U@33090,3G7XE@35493,3I62Q@38820,3KUNQ@4447	NA|NA|NA	cellular response to steroid hormone stimulus
TaBZR5.2	4572.TRIUR3_11319-P1	1.9e-155	555.4				2CMIA@1,2QQEG@2759,37R2U@33090,3G7XE@35493,3I62Q@38820,3KUNQ@4447	NA|NA|NA	cellular response to steroid hormone stimulus
TaBZR5.3	37682.EMT29878	1.7e-156	558.9				2CMIA@1,2QQEG@2759,37R2U@33090,3G7XE@35493,3I62Q@38820,3KUNQ@4447	NA|NA|NA	cellular response to steroid hormone stimulus
TaBZR6	4565.Traes_6AS_7B3C53009.2	0	1195.6	GO:0003674,GO:0003700,GO:0003824,GO:0004553,GO:0005575,GO:0005622,GO:0005623,GO:0005634,GO:0006355,GO:0008150,GO:0009889,GO:0010468,GO:0010556,GO:0016160,GO:0016161,GO:0016787,GO:0016798,GO:0019219,GO:0019222,GO:0031323,GO:0031326,GO:0043226,GO:0043227,GO:0043229,GO:0043231,GO:0044424,GO:0044464,GO:0048831,GO:0050789,GO:0050793,GO:0050794,GO:0051171,GO:0051239,GO:0051252,GO:0060255,GO:0065007,GO:…	ko00500,map00500	ko:K01177	2CJU3@1,2QW2E@2759,37MJB@33090,3G79J@35493,3I4JD@38820,3KU7I@4447	NA|NA|NA	Glycosyl hydrolase family 14
