# Supplementary material for: Genome-Wide Identification and Characterization of the Brassinazole-resistant (BZR) Gene Family and Its Expression in the Various Developmental Stage and Stress Conditions in Wheat (Triticum aestivum L.)
Source: Int J Mol Sci. 2021 Aug 14;22(16):8743. doi: 10.3390/ijms22168743 (PMC8395832; doi:10.3390/ijms22168743)
Supplement: Supplementary file 1 [file ijms-22-08743-s001.zip › Table S9.xls]

## Sheet: Sheet1
Table S9: The protein-protein interaction network between TaBZR and other plant species BZRs protein.
Node1	Node2	Neighborhood_on_chromosome	Gene_fusion	Phylogenetic_cooccurrence	Homology	Coexpression	Experimentally_determined_interaction	Database_annotated	Automated_textmining	Combined_score
TaBZR3.2	Traes_2AL_62160B4F7.2	0	0	0	0	0	0	0.872	0.696	0.959
TaBZR3.2	Traes_2BL_91F9836DC.2	0	0	0	0	0	0	0.872	0.696	0.959
TaBZR3.2	Traes_2DL_BCFBE0E93.2	0	0	0	0	0	0	0.872	0.696	0.959
TaBZR3.2	Traes_3AL_7160E6873.1	0	0	0	0	0	0	0.871	0.559	0.94
TaBZR3.2	Traes_3AL_D26C8906B.1	0	0	0	0	0	0	0.871	0.559	0.94
TaBZR3.2	Traes_5BL_CA33BB947.1	0	0	0	0	0.049	0	0.873	0.557	0.941
TaBZR3.2	Traes_5DL_64F27292C.1	0	0	0	0	0.049	0	0.873	0.557	0.941
TaBZR3.2	Traes_5AL_ED21C722B.1	0	0	0	0	0.049	0	0.873	0.557	0.941
TaBZR3.2	Traes_5AL_5D542B354.2	0	0	0	0	0	0	0.872	0.631	0.95
TaBZR3.2	Traes_5BL_1E6720B2B.1	0	0	0	0	0	0	0.872	0.631	0.95
TaBZR6	Traes_2AL_62160B4F7.2	0	0	0	0	0	0	0.495	0.723	0.854
TaBZR6	Traes_2BL_91F9836DC.2	0	0	0	0	0	0	0.495	0.723	0.854
TaBZR6	Traes_2DL_BCFBE0E93.2	0	0	0	0	0	0	0.495	0.723	0.854
TaBZR6	Traes_3AL_7160E6873.1	0	0	0	0	0	0	0.425	0.662	0.797
TaBZR6	Traes_3AL_D26C8906B.1	0	0	0	0	0	0	0.425	0.662	0.797
TaBZR6	Traes_5AL_ED21C722B.1	0	0	0	0	0	0	0.495	0.557	0.766
TaBZR6	Traes_5BL_CA33BB947.1	0	0	0	0	0	0	0.495	0.557	0.766
TaBZR6	Traes_5DL_64F27292C.1	0	0	0	0	0	0	0.495	0.557	0.766
Traes_2AL_62160B4F7.2	Traes_5AL_5D542B354.2	0.215	0	0	0	0.11	0	0.872	0.68	0.967
Traes_2AL_62160B4F7.2	Traes_5BL_1E6720B2B.1	0.215	0	0	0	0.11	0	0.872	0.68	0.967
Traes_2AL_62160B4F7.2	Traes_5BL_CA33BB947.1	0.217	0	0	0	0.572	0.077	0.872	0.608	0.981
Traes_2AL_62160B4F7.2	Traes_5DL_64F27292C.1	0.217	0	0	0	0.572	0.077	0.872	0.608	0.981
Traes_2AL_62160B4F7.2	Traes_5AL_ED21C722B.1	0.217	0	0	0	0.572	0.077	0.872	0.608	0.981
Traes_2BL_91F9836DC.2	Traes_5AL_5D542B354.2	0.215	0	0	0	0.11	0	0.872	0.68	0.967
Traes_2BL_91F9836DC.2	Traes_5BL_1E6720B2B.1	0.215	0	0	0	0.11	0	0.872	0.68	0.967
Traes_2BL_91F9836DC.2	Traes_5BL_CA33BB947.1	0.217	0	0	0	0.572	0.077	0.872	0.608	0.981
Traes_2BL_91F9836DC.2	Traes_5DL_64F27292C.1	0.217	0	0	0	0.572	0.077	0.872	0.608	0.981
Traes_2BL_91F9836DC.2	Traes_5AL_ED21C722B.1	0.217	0	0	0	0.572	0.077	0.872	0.608	0.981
Traes_2DL_BCFBE0E93.2	Traes_5AL_5D542B354.2	0.215	0	0	0	0.11	0	0.872	0.68	0.967
Traes_2DL_BCFBE0E93.2	Traes_5BL_1E6720B2B.1	0.215	0	0	0	0.11	0	0.872	0.68	0.967
Traes_2DL_BCFBE0E93.2	Traes_5BL_CA33BB947.1	0.217	0	0	0	0.572	0.077	0.872	0.608	0.981
Traes_2DL_BCFBE0E93.2	Traes_5DL_64F27292C.1	0.217	0	0	0	0.572	0.077	0.872	0.608	0.981
Traes_2DL_BCFBE0E93.2	Traes_5AL_ED21C722B.1	0.217	0	0	0	0.572	0.077	0.872	0.608	0.981
Traes_3AL_7160E6873.1	Traes_5BL_CA33BB947.1	0.217	0	0	0	0.851	0.077	0.871	0.752	0.995
Traes_3AL_7160E6873.1	Traes_5DL_64F27292C.1	0.217	0	0	0	0.851	0.077	0.871	0.752	0.995
Traes_3AL_7160E6873.1	Traes_5AL_5D542B354.2	0.215	0	0	0	0.758	0	0.871	0.822	0.995
Traes_3AL_7160E6873.1	Traes_5BL_1E6720B2B.1	0.215	0	0	0	0.758	0	0.871	0.822	0.995
Traes_3AL_7160E6873.1	Traes_5AL_ED21C722B.1	0.217	0	0	0	0.851	0.077	0.871	0.752	0.995
Traes_3AL_D26C8906B.1	Traes_5BL_CA33BB947.1	0.217	0	0	0	0.851	0.077	0.871	0.752	0.995
Traes_3AL_D26C8906B.1	Traes_5DL_64F27292C.1	0.217	0	0	0	0.851	0.077	0.871	0.752	0.995
Traes_3AL_D26C8906B.1	Traes_5AL_5D542B354.2	0.215	0	0	0	0.758	0	0.871	0.822	0.995
Traes_3AL_D26C8906B.1	Traes_5BL_1E6720B2B.1	0.215	0	0	0	0.758	0	0.871	0.822	0.995
Traes_3AL_D26C8906B.1	Traes_5AL_ED21C722B.1	0.217	0	0	0	0.851	0.077	0.871	0.752	0.995
Traes_5AL_5D542B354.2	Traes_5BL_CA33BB947.1	0.216	0	0.326	0	0.851	0.1	0.874	0.77	0.997
Traes_5AL_5D542B354.2	Traes_5DL_64F27292C.1	0.216	0	0.326	0	0.851	0.1	0.874	0.77	0.997
Traes_5AL_5D542B354.2	Traes_5AL_ED21C722B.1	0.216	0	0.327	0	0.851	0.1	0.874	0.77	0.997
Traes_5AL_ED21C722B.1	Traes_5BL_1E6720B2B.1	0.216	0	0.328	0	0.851	0.1	0.874	0.77	0.997
Traes_5BL_1E6720B2B.1	Traes_5BL_CA33BB947.1	0.216	0	0.327	0	0.851	0.1	0.874	0.77	0.997
Traes_5BL_1E6720B2B.1	Traes_5DL_64F27292C.1	0.216	0	0.328	0	0.851	0.1	0.874	0.77	0.997
