# Supplementary material for: Genome-Wide Identification and Characterization of the Brassinazole-resistant (BZR) Gene Family and Its Expression in the Various Developmental Stage and Stress Conditions in Wheat (Triticum aestivum L.)
Source: Int J Mol Sci. 2021 Aug 14;22(16):8743. doi: 10.3390/ijms22168743 (PMC8395832; doi:10.3390/ijms22168743)
Supplement: Supplementary file 1 [file ijms-22-08743-s001.zip › Table S10.xls]

## Sheet: Sheet1
Table S10. qRT-PCR primers of TaBZR genes.
Gene name	Primer name	Sequence (5'-3')
TaBZR1.2	qPTaBZR1.2-F	GGTGGATCAGCTTCCAGATG
	qPTaBZR1.2-R	GCCATTCCATCCAACTCCA
TaBZR1.3	qPTaBZR1.3-F	GCACCCGGACACGATAC
	qPTaBZR1.3-R	CTAGGTTGACGAGGTTGTACG
TaBZR2.2	qPTaBZR2.2-F	TGTTCCTCATATCAGCCAAGTC
	qPTaBZR2.2-R	TTGTTAGAATGCGGGAGGAAG
TaBZR2.5	qPTaBZR2.5-F	GTGGCCACCAGGATCTAC
	qPTaBZR2.5-R	ACGTTGCCTTCGTCGTC
TaBZR2.6	qPTaBZR2.6-F	CAAGCACTGCGACAACAAC
	qPTaBZR2.6-R	TGACACTGAGCACCCAATC
TaBZR3.1	qPTaBZR3.1-F	TTCGAGGATGGGATCATTTCAG
	qPTaBZR3.1-R	TCTCCAATGCCAGGGTATTTC
TaBZR4.2	qPTaBZR4.2-F	CTCATCCCTTGGCTCAAGAAC
	qPTaBZR4.2-R	AGCCACCGCTGAAGTAGTA
TaBZR4.5	qPTaBZR4.5-F	GCAGCGGCAGCTACTATG
	qPTaBZR4.5-R	ACTTGGAAGAGGACGGGAA
TaBZR5.2	qPTaBZR5.2-F	TCACTCTTGGTGGTGGAAAC
	qPTaBZR5.2-R	TTGGAGGAGGAGGCAAATG
TaBZR6	qPTaBZR6-F	TCACCGTCGTCATTGGATTC
	qPTaBZR6-R	CTCTCAATAGCTGGTCACTTCC
TaActin	TaActin-F	CTCCCTCACAACAACCGC
	TaActin-R	TACCAGGAACTTCCATACCAAC
